# Supplementary material
Source: PubMed Central journal article supplement (PMC4581996)

# Design of CID-Cleavable Protein Cross-linkers: Identical Mass Modifications for Simpler Sequence Analysis

Wynne V. Kandur<sup>a</sup>, Athit Kao<sup>b</sup>, Danielle Vellucci<sup>a</sup>, Lan Huang<sup>b</sup>, and Scott D.  
Rychnovsky<sup>a\*</sup>

<sup>a</sup>Department of Chemistry, University of California, Irvine, CA 92697

<sup>b</sup>Departments of Physiology & Biophysics, University of California, Irvine, CA 92697

## *Supporting Information*

### Contents:

|      |                              |    |
|------|------------------------------|----|
| I.   | General Methods.....         | 2  |
| II.  | Synthesis of Substrates..... | 4  |
| III. | IML 2 MS Data.....           | 9  |
| IV.  | References.....              | 10 |
| V.   | Spectral Data.....           | 11 |

## General Methods

$^1\text{H}$  NMR and  $^{13}\text{C}$  NMR spectra were recorded at ambient temperature at 500 MHz and 125 MHz, respectively, on a Bruker DRX500 NMR instrument.  $^1\text{H}$  and  $^{13}\text{C}$  NMR data is reported as follows: chemical shifts are reported in ppm on a  $\delta$  scale and referenced to internal tetramethylsilane or residual solvent (TMS:  $\delta$  0.00;  $\text{CHCl}_3$ :  $\delta$  7.27( $^1\text{H}$ ), 77.23 ( $^{13}\text{C}$ )), multiplicity (s = singlet, d = doublet, t = triplet, q = quartet, qu = quintet, m = multiplet), coupling constants (Hz), and integration. Infrared (IR) spectra were obtained using a FT-IR spectrometer. Accurate mass spectra were acquired on a Waters LCT Premier quadrupole time-of-flight spectrometer and were obtained by peak matching. Gas chromatography/mass spectrometry (GC/MS) was performed with a Thermo-Finnigan Trace Mass Spectrometer Plus quadrupole system with a fused silica capillary column (30 m x 0.32 mm x 0.25 mm) wall-coated with DB-5 (J & W Scientific) using electron ionization (70 eV) or a Waters GCT Premier orthogonal acceleration time-of-flight spectrometer using chemical ionization. Melting points are uncorrected and were obtained using a Büchi 510 melting point apparatus. Analytical thin layer chromatography was performed on EMD Chemicals Inc. silica gel 60 F<sub>254</sub> plates. Liquid chromatography was performed using forced flow (flash chromatography) of the indicated solvent system on Sorbent Technologies silica gel ( $\text{SiO}_2$ ) 60 (230–400 mesh). Unless otherwise noted, all reactions were carried out under an atmosphere of argon in flame-dried glassware. Solvents were distilled from  $\text{CaH}_2$  or filtered through alumina before use.<sup>1</sup>

### General procedure 1: Ester Hydrolysis

Starting ester was dissolved in 2:1 or 4:1 THF:H<sub>2</sub>O, depending on solubility. The mixture was cooled to 0 °C and lithium hydroxide (98%, 5 equiv.) dissolved in minimal

H<sub>2</sub>O was added slowly. The reaction was monitored by thin layer chromatography, while stirring vigorously. Upon completion, the mixture was diluted with diethyl ether and water before the layers were separated. Diethyl ether was added to the resulting aqueous layer, followed by addition of HCl to pH 1. The layers were separated and the aqueous layer was extracted with diethyl ether (2x). Organics were combined, washed with brine, dried over Na<sub>2</sub>SO<sub>4</sub>, filtered and evaporated *in vacuo*.

### **General procedure 2: TBAF-Promoted Michael Additions**

Acrylic acid (0.28 mmol), thiophenol (0.51 mmol), and THF (1 mL) were combined in a round bottom flask to which TBAF•3H<sub>2</sub>O (0.06 mmol) was added at rt. The flask was fitted with a cold-water condenser and the mixture was heated to 50° C for 16 h. The mixture was cooled to rt, evaporated *in vacuo*, diluted with EtOAc and washed with 1N HCl (2x). The organic layer was washed with brine, dried over Na<sub>2</sub>SO<sub>4</sub>, filtered, and evaporated *in vacuo* to yield the crude product. In some cases, this reaction was run neat.<sup>2</sup>

### **General procedure 3: NHS Ester Preparation**

Crude diacid (0.08 mmol) was dissolved in dry dichloromethane (0.62 mL) in a flame dried round bottom flask under argon. NHS•TFA (0.41 mmol) was added before a slow addition of triethylamine (0.49 mmol) at 0° C. The mixture was left to warm slowly overnight while stirring under argon. After 16 h, the mixture was diluted with dichloromethane and washed with water (2x). The organic layer was dried with Na<sub>2</sub>SO<sub>4</sub>, filtered, and evaporated *in vacuo*.

**General procedure 4: *m*-CPBA-Oxidation to Sulfoxide**

Di-NHS ester (0.026 mmol) was dissolved in CDCl<sub>3</sub> (1 mL) and *m*-CPBA (77% w/w, 0.026 mmol) was added slowly while monitoring by LRMS ESI + and <sup>1</sup>H NMR. When this reaction was run on larger scale than 30 mg starting material, the solution was cooled in an ice bath prior to *m*-CPBA addition. Once the reaction was complete, the solution was diluted with dichloromethane (2 mL) and washed with 10% sodium bicarbonate solution (3 x 2 mL). The organic layer was dried over Na<sub>2</sub>SO<sub>4</sub>, filtered, and evaporated *in vacuo* to afford the product.

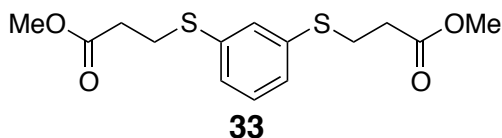

**Dimethyl 3,3'-(1,3-phenylenebis(sulfanediyl))dipropanoate (33):** 1,3-benzenedithiol (0.500 g, 3.52 mmol) and methyl acrylate (0.632 mL, 7.02 mmol) were dissolved in THF (6 mL), and Et<sub>3</sub>N (0.980 mL, 7.03 mmol) was added to the solution. After 5 h, the reaction mixture was partitioned between H<sub>2</sub>O (10 mL) and EtOAc (10 mL). The EtOAc layer was collected, washed with brine (10 mL), dried over MgSO<sub>4</sub>, filtered, and concentrated under reduced pressure. The crude oil was purified by silica gel chromatography (5:1 hexanes:EtOAc) to afford 0.550 g (50%) of the sulfide as a clear, colorless oil: <sup>1</sup>H (500 MHz, CDCl<sub>3</sub>) δ 7.38 (s, 1H), 7.29–7.22 (m, 3H), 3.73 (s, 6H), 3.22 (t, *J* = 7.5 Hz, 4H), 2.69 (t, *J* = 7.5 Hz, 4H); <sup>13</sup>C (125 MHz, CDCl<sub>3</sub>) δ 172.2, 136.6, 130.5, 129.6, 127.0, 52.0, 34.2, 28.8; IR (neat) 2997, 2951, 2846, 1739, 1570 cm<sup>-1</sup>; Accurate Mass (ES<sup>+</sup>/MeOH) *m/z* calcd for C<sub>14</sub>H<sub>18</sub>O<sub>4</sub>S<sub>2</sub>Na [M+Na]<sup>+</sup> 337.0544, found 337.0547.

**Bis(2,5-dioxopyrrolidin-1-yl) 3,3'-(1,3-phenylenedisulfinyl)dipropanoate (2).** Bis(2,5-dioxopyrrolidin-1-yl) 3,3'-(1,3-phenylenebis(sulfanediyl))dipropanoate (0.110 g, 0.229 mmol) was dissolved in CHCl<sub>3</sub> (7 mL), and the reaction mixture was cooled to 0°C.

A solution of *m*-CPBA (0.105 g, 0.457 mmol) in CHCl<sub>3</sub> (2 mL) was added drop-wise, and the reaction mixture was stirred for 10 min. The reaction mixture was then partitioned between CHCl<sub>3</sub> (10 mL) and saturated aqueous NaHCO<sub>3</sub> (10 mL). The CHCl<sub>3</sub> layer was collected, dried over MgSO<sub>4</sub>, filtered, and concentrated to afford 0.080 g (75%) of sulfoxide **2** as a white solid: <sup>1</sup>H (500 MHz, CDCl<sub>3</sub>) δ 7.93–7.90 (m, 1H), 7.80–7.78 (m, 3H), 3.46–3.38 (m, 2H), 3.17–3.10 (m, 4H), 2.82 (brs, 10H); <sup>13</sup>C (125 MHz, CDCl<sub>3</sub>) δ 169.0, 167.0, 144.6, 144.5, 131.0, 127.1, 120.3, 49.7, 49.5, 25.7, 22.9, 22.7; IR (KBr) 2943, 2935, 1786, 1736, 1427 cm<sup>-1</sup>; Accurate Mass (ES+/MeOH) *m/z* calcd for C<sub>20</sub>H<sub>20</sub>N<sub>20</sub>O<sub>10</sub>S<sub>2</sub>Na [M+Na]<sup>+</sup> 535.0457, found 535.0457.

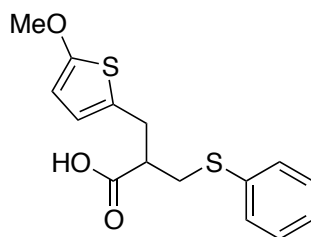**31**

**3-(5-methoxythiophen-2-yl)-2-((phenylthio)methyl)propanoic acid (31).** Acrylic acid **29** (0.073 g, 0.25 mmol) and thiophenol (0.039 mL, 0.38 mmol) were subjected to general procedure 2 without solvent. The crude product was purified by flash column chromatography (30% EtOAc/hexanes) to yield desired product (0.018 g, 23%). <sup>1</sup>H NMR (500 MHz, CDCl<sub>3</sub>) δ 7.36 (d, *J* = 7.9, 2H), 7.29 (t, *J* = 7.6, 2H), 7.22 (t, *J* = 7.6, 1H), 6.42 (d, *J* = 3.6, 1H), 5.99 (d, *J* = 3.8, 1H), 3.84 (s, 3H), 3.23 (dd, *J* = 7.7, 13.7, 1H), 3.16–3.04 (m, 3H), 2.88 (quintet, *J* = 6.8, 1H); <sup>13</sup>C NMR (125 MHz, CDCl<sub>3</sub>) δ 179.2, 165.3, 135.2, 130.5, 129.3, 127.0, 126.0, 123.8, 103.4, 60.4, 47.0, 34.6, 31.6; cm<sup>-1</sup>; Accurate Mass ES- *m/z* calcd for C<sub>15</sub>H<sub>15</sub>O<sub>3</sub>S<sub>2</sub> (M-H)<sup>-</sup> 307.0463, found 307.0466.

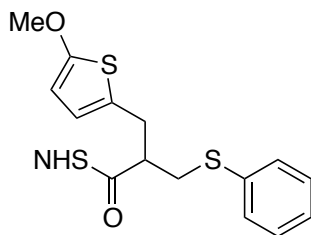**40**

**NHS ester 40.** Carboxylic acid **31** (0.018 g, 0.058 mmol) was combined with dry DMF (0.3 mL), NHS (0.013 g, 0.12 mmol), pyridine (0.019 mL, 0.23 mmol), and, lastly, trifluoroacetic anhydride (0.016 mL, 0.12 mmol). After 2.5 h stirring at rt, the mixture was diluted with dichloromethane and 1M HCl. After the layers were separated, the organic layer was washed with 1 M HCl (2x) and dilute NaHCO<sub>3</sub> solution (2x). The organic layer was dried with Na<sub>2</sub>SO<sub>4</sub>, filtered, and evaporated *in vacuo*. This procedure is adapted from a published procedure.<sup>3</sup> The crude product was purified by flash column chromatography (2% EtOAc/CH<sub>2</sub>Cl<sub>2</sub>) to yield desired product (0.015 g, 63%). <sup>1</sup>H NMR (500 MHz, CDCl<sub>3</sub>) δ 7.26-7.20 (m, 3H), 7.07 (d, *J* = 6.5, 1H), 4.15 (q, *J* = 7.2, 2H), 3.17 (t, *J* = 7.4, 2H), 3.04 (t, *J* = 7.5, 2H), 2.92 (t, *J* = 7.7, 2H), 2.85 (s, 4H), 2.62 (t, *J* = 7.4, 2H), 1.26 (t, *J* = 7.1, 3H); <sup>13</sup>C NMR (125 MHz, CDCl<sub>3</sub>) δ 172.0, 169.3, 168.0, 140.2, 136.0, 129.9, 129.5, 128.4, 126.7, 60.9, 34.6, 32.7, 30.5, 29.1, 25.8, 14.4; IR (liquid) 2928, 1814, 1784, 1737, 1591 cm<sup>-1</sup>; Accurate Mass ES+ *m/z* calcd for C<sub>19</sub>H<sub>19</sub>O<sub>5</sub>S<sub>2</sub>NNa (M+Na)<sup>+</sup> 428.0602, found 428.0591.

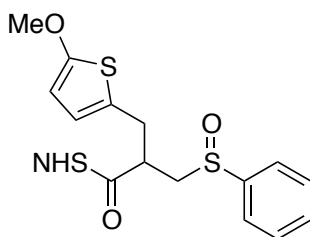**10**

**Sulfoxide 10.** NHS ester **40** (0.012 g, 0.03 mmol) was subjected to general procedure 4. The crude product was purified by flash column chromatography (10–20% EtOAc/CH<sub>2</sub>Cl<sub>2</sub>) to yield desired product as a mixture of diastereomers (0.003 g, 26%). <sup>1</sup>H NMR (500 MHz, CDCl<sub>3</sub>) δ 7.68–7.63 (m, 2H), 7.53 (m, 3H), 6.61 (d, *J* = 3.8, 0.6H), 6.49 (d, *J* = 3.7, 0.5H), 6.04 (d, *J* = 3.8, 0.6H), 5.98 (d, *J* = 3.8, 0.5H), 3.86 (s, 1.8H), 3.84 (s, 1.3H), 3.60–3.53 (m, 0.5H), 3.47–3.40 (m, 0.6H), 3.39 (s, 0.6H), 3.38 (s, 0.5H), 3.30–3.24 (m, 1.5H), 3.10 (dd, *J* = 7.2, 15.3, 0.5H), 3.03 (dd, *J* = 8.0, 13.2, 0.6H), 2.96 (dd, *J* = 4.0, 13.4, 0.5H), 2.87 (s, 2.1H), 2.84 (s, 2.3H); <sup>13</sup>C NMR (125 MHz, CDCl<sub>3</sub>) δ 168.7, 168.6, 168.3, 165.7, 165.6, 143.5, 143.0, 131.6, 131.4, 129.6, 129.5, 125.3, 124.8, 124.2, 124.0, 123.5, 123.2, 103.6, 103.5, 60.2, 60.2, 57.8, 56.6, 39.5, 39.0, 32.5, 31.0, 29.8, 25.7, 25.6; IR (thin film) 2924, 1810, 1782, 1739, 1507, cm<sup>-1</sup>; Accurate Mass ES+ *m/z* calcd for C<sub>19</sub>H<sub>19</sub>NO<sub>6</sub>S<sub>2</sub>Na (M+Na)<sup>+</sup> 444.0551, found 444.0548.

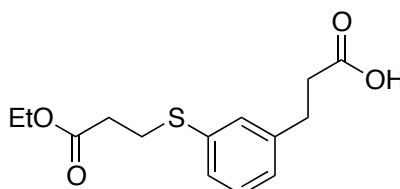**32**

**3-(3-((3-Ethoxy-3-oxopropyl)thio)phenyl)propanoic acid (32).** Carboxylic acid **15** (0.10 g, 0.55 mmol) was combined with ethyl acrylate (0.088 mL, 0.82 mmol) in ethanol (5.5 mL) in a scintillation vial. Triethylamine (0.15 mL, 1.1 mmol) was added and the mixture was capped and stirred 14 days. The solvent was removed and the crude product was purified by flash column chromatography (50% EtOAc/hexanes) to yield desired product (0.022 g, 14%). <sup>1</sup>H NMR (500 MHz, CDCl<sub>3</sub>) δ 7.23 (br s, 3H), 7.07 (d, *J* = 6.7, 1H), 4.16 (q, *J* = 7.2, 2H), 3.17 (t, *J* = 7.3, 2H), 2.95 (t, *J* = 7.6, 2H), 2.68 (t, *J* = 7.6, 2H), 2.61 (t, *J* = 7.5, 2H), 1.25 (t, *J* = 7.2, 3H); <sup>13</sup>C NMR (125 MHz, CDCl<sub>3</sub>) δ 177.7, 172.2, 141.3, 135.6, 130.0, 129.4, 128.2, 126.8, 61.1, 35.5, 34.7, 30.7, 29.2, 14.4; IR

(thin film) 3200, 2982, 2661, 2361, 1732  $\text{cm}^{-1}$ ; Accurate Mass ES-  $m/z$  calcd for  $\text{C}_{14}\text{H}_{17}\text{O}_4\text{S}$  (M-H)<sup>-</sup> 281.0847, found 281.0844.

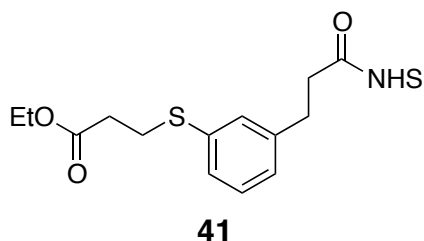

**NHS ester 41.** Carboxylic acid **32** (0.022 g, 0.078 mmol) was combined with dry DMF (0.4 mL), NHS (0.018 g, 0.16 mmol), pyridine (0.025 mL, 0.31 mmol), and, lastly, trifluoroacetic anhydride (0.022 mL, 0.16 mmol). After 2.5 h stirring at rt, the mixture was diluted with dichloromethane and 1M HCl. After the layers were separated, the organic layer was washed with 1 M HCl (2x) and dilute  $\text{NaHCO}_3$  solution (2x). The organic layer was dried with  $\text{Na}_2\text{SO}_4$ , filtered, and evaporated *in vacuo*. This procedure is adapted from a published procedure.<sup>3</sup> The crude product was purified by flash column chromatography (10% EtOAc/ $\text{CH}_2\text{Cl}_2$ ) to yield desired product (0.009 g, 30%). <sup>1</sup>H NMR (500 MHz,  $\text{CDCl}_3$ )  $\delta$  7.40 (d,  $J = 7.4$ , 2H), 7.31 (t,  $J = 7.5$ , 2H), 7.26 (t,  $J = 7.3$ , 1H), 6.50 (d,  $J = 3.7$ , 1H), 6.00 (d,  $J = 3.7$ , 1H), 3.85 (s, 3H), 3.33–3.05 (m, 5H), 2.84 (s, 4H); <sup>13</sup>C NMR (125 MHz,  $\text{CDCl}_3$ )  $\delta$  169.1, 169.0, 165.5, 134.6, 131.1, 129.4, 127.3, 124.7, 124.6, 103.6, 60.4, 44.9, 34.7, 31.4, 25.8; IR (liquid) 3057, 2944, 1810, 1737, 1562  $\text{cm}^{-1}$ ; Accurate Mass ES+  $m/z$  calcd for  $\text{C}_{18}\text{H}_{21}\text{O}_6\text{SNa}$  (M+Na)<sup>+</sup> 402.0987, found 402.0979.

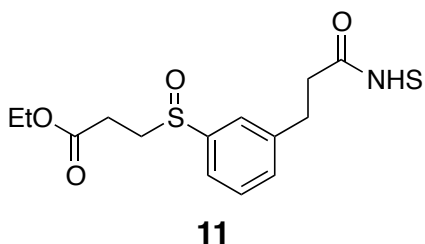

**Sulfoxide 11.** NHS ester **41** (0.007 g, 0.02 mmol) was subjected to general procedure 4 to yield desired product (0.005 g, 60%). <sup>1</sup>H NMR (500 MHz,  $\text{CDCl}_3$ )  $\delta$  7.54–7.46 (m,



3H), 7.39 (d,  $J = 3.8$ , 1H), 4.18–4.07 (m, 2H), 3.28–3.20 (m, 1H), 3.15 (t,  $J = 7.5$ , 2H), 3.00–2.93 (m, 3H), 2.90–2.79 (m, 5H), 2.56–2.45 (m, 1H), 1.25 (t,  $J = 7.0$ , 3H);  $^{13}\text{C}$  NMR (125 MHz,  $\text{CDCl}_3$ )  $\delta$  171.5, 169.2, 167.8, 143.7, 140.8, 131.4, 129.9, 124.0, 122.8, 61.3, 51.3, 32.6, 30.6, 26.4, 25.8, 14.4; IR (thin film) 2930, 2360, 1813, 1783, 1737  $\text{cm}^{-1}$ ; Accurate Mass ES+  $m/z$  calcd for  $\text{C}_{18}\text{H}_{21}\text{NO}_7\text{SNa}$  ( $\text{M}+\text{Na}$ ) $^+$  418.0937, found 418.0917.

### IML 2 MS Data:

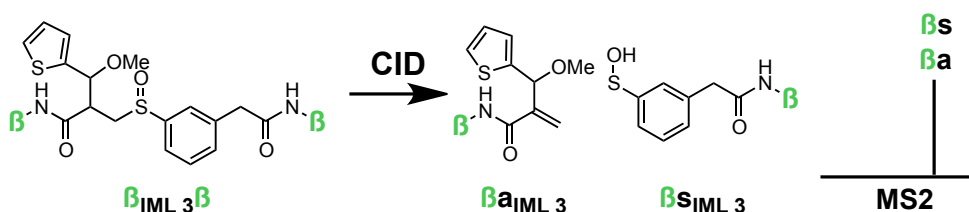

Figure 1. Expected fragmentation of IML 3 in single peptide crosslinking

Initial testing of IML 3 with synthetic peptide Ac-IR7 in the MS instrument showed significant loss of the methoxy group during CID (Figure 2). The  $\text{MS}^2$  spectrum shows three peaks representing the IML 3-modified peptides. The first peak,  $m/z$  496.73, represents a doubly charged IML 3-modified peptide that has lost a methoxy substituent during CID fragmentation (Figure 2, top left). This peak could only represent the alkene half of the linker, since it contains a labile methoxy in the benzylic position. When this peak was subjected to further CID, sequence data was acquired (Figure 2, top right). Similarly, the  $\text{MS}^2$  peak with  $m/z$  1024.48 represents a singly charged ion with the expected half IML modification. This peak could represent either the sulfenic acid-modified or the alkene-modified peptide, or it could represent a mixture of the two. Further CID of the  $m/z$  1024.48 peak results in sequence data acquisition as well (Figure 2, lower right). The third peak in  $\text{MS}^2$ , with  $m/z$  595.75, represents a dead end-modified peptide that has lost the methoxy substituent during the first CID and has not undergone sulfoxide elimination. This dead end could be linked to the peptide on either end, so it is assumed the peak represents a mixture of both possible peptide linkages. When the  $m/z$

595.75 peak is subjected to CID, the result is the expected products of sulfoxide fragmentation of the two differently-linked dead ends: one peak is the sulfenic acid modified peptide ( $1^+$  with  $m/z$  1024.48), and one is the alkene-modified peptide without a methoxy substituent ( $2^+$  with  $m/z$  496.73) (Figure 2, lower left). This data strongly supports the notion that the  $m/z$  595.75 peak represents a mixture of both dead ends. With sulfoxide fragmentation occurring between  $MS^2$  and  $MS^3$ , sequence data could not be gathered for the  $m/z$  595.75 peptides.

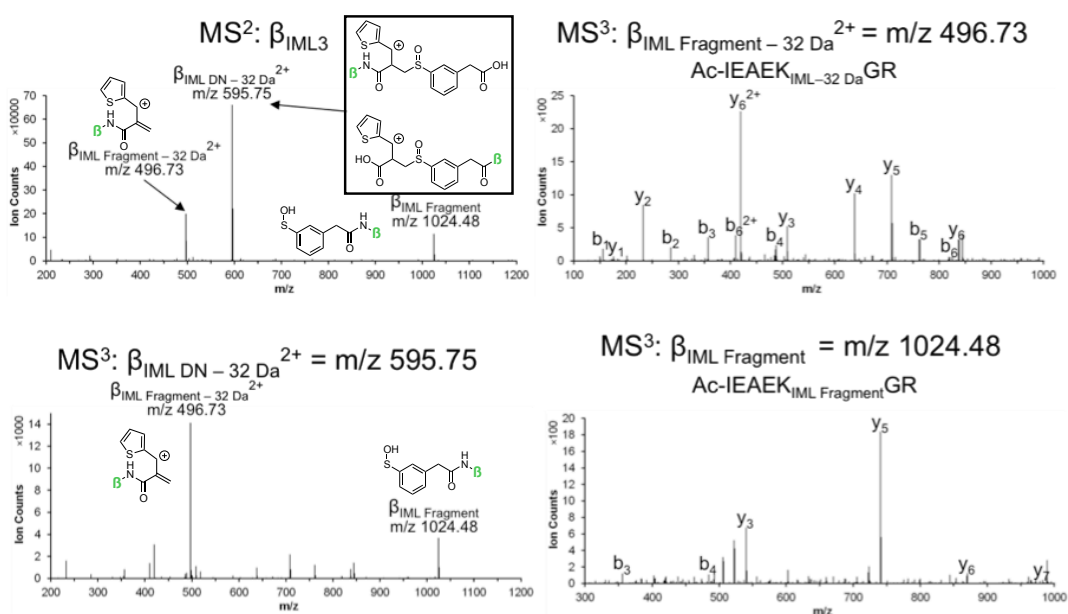

Figure 2. IML 2 Methoxy-loss in MS

## References:

1. A. B. Pangborn, M. A. Giardello, R. H. Grubbs, R. K. Rosen, and F. J. Timmers, *Organometallics*, 1996, **15**, 1518–1520.
2. S. Gao, C. Tseng, C. H. Tsai, and C.-F. Yao, *Tetrahedron*, 2008, **64**, 1955–1961.
3. N. M. Leonard and J. Brunckova, *J. Org. Chem.*, 2011, **76**, 9169–9174.







Z-restored spin-echo 13C spectrum with 1H decoupling

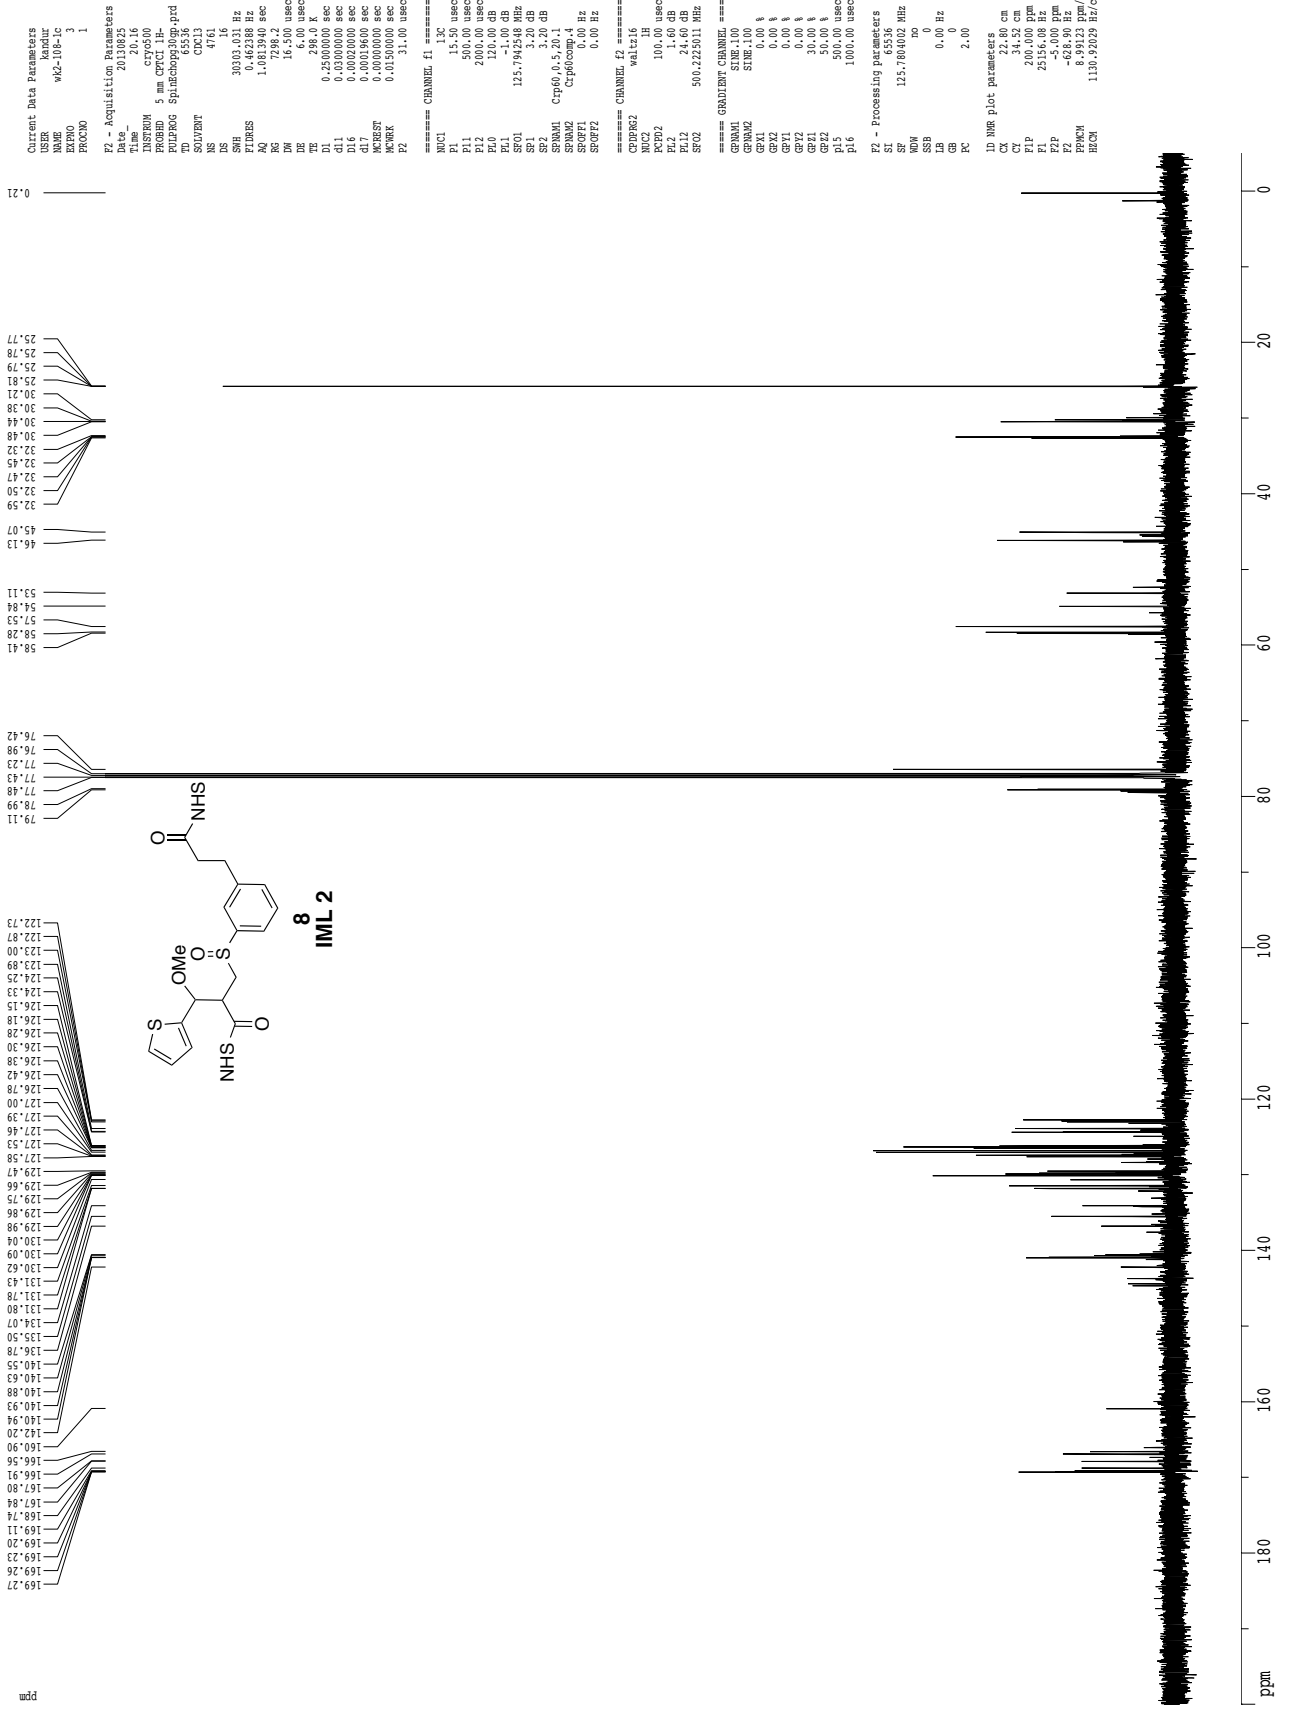

<sup>1</sup>H spectrum

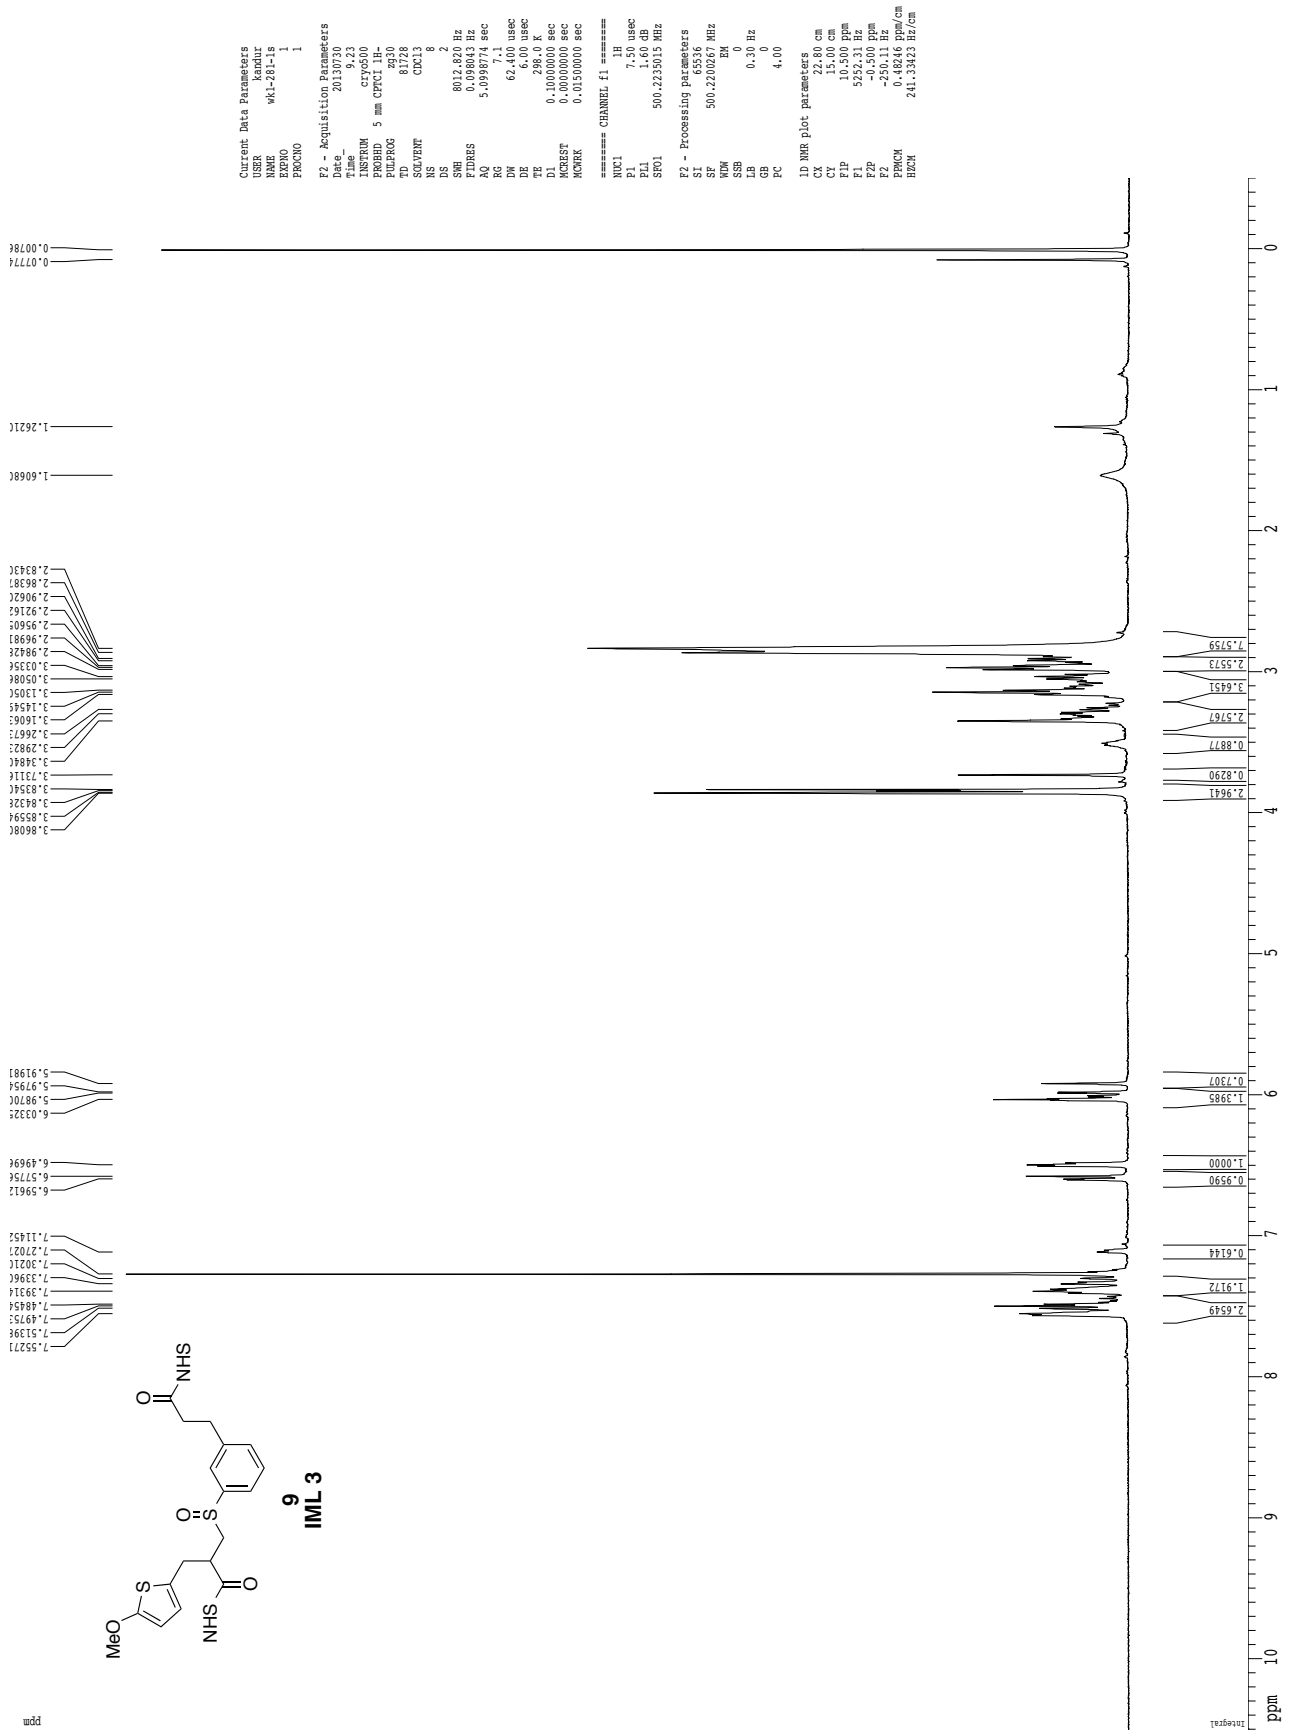

Z-restored spin-echo 13C spectrum with 1H decoupling

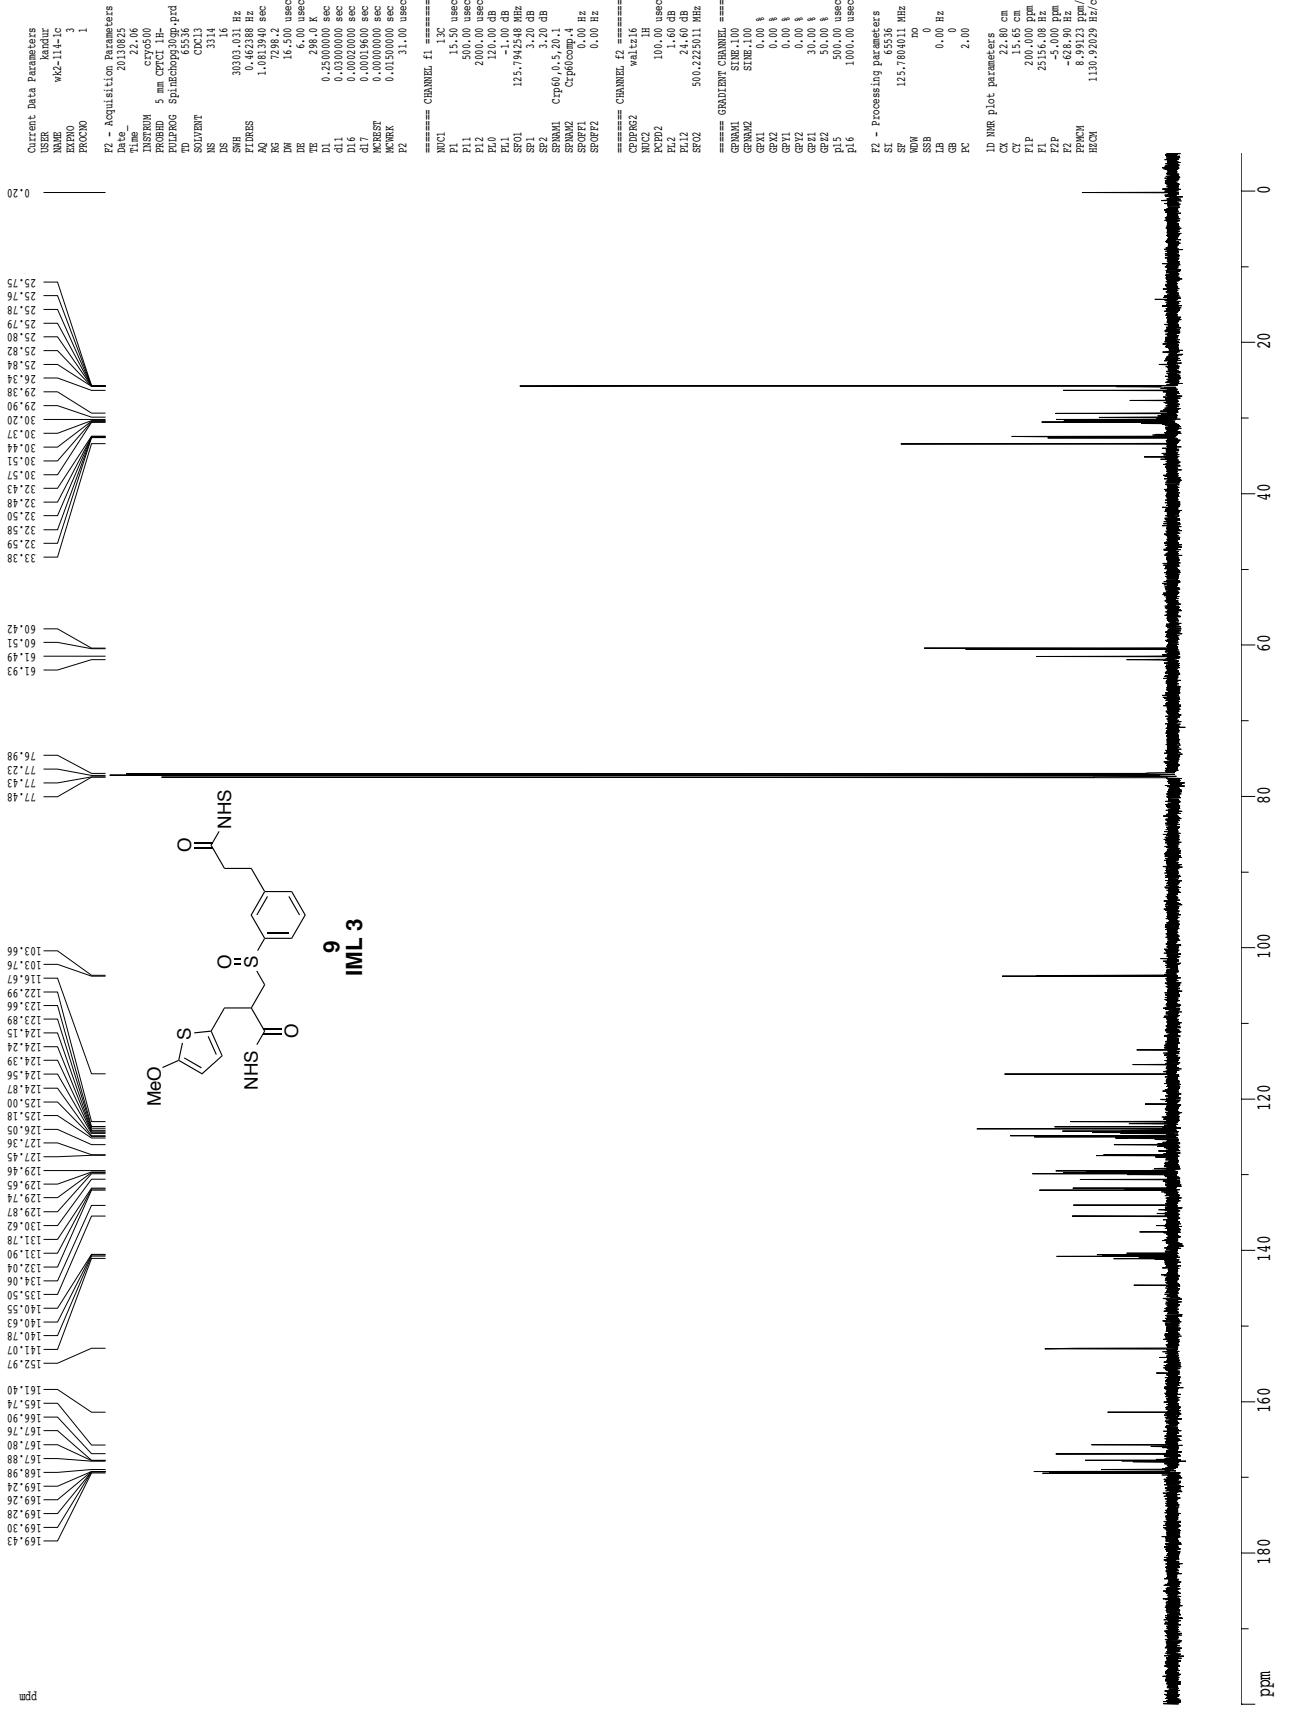



<sup>1</sup>H spectrum

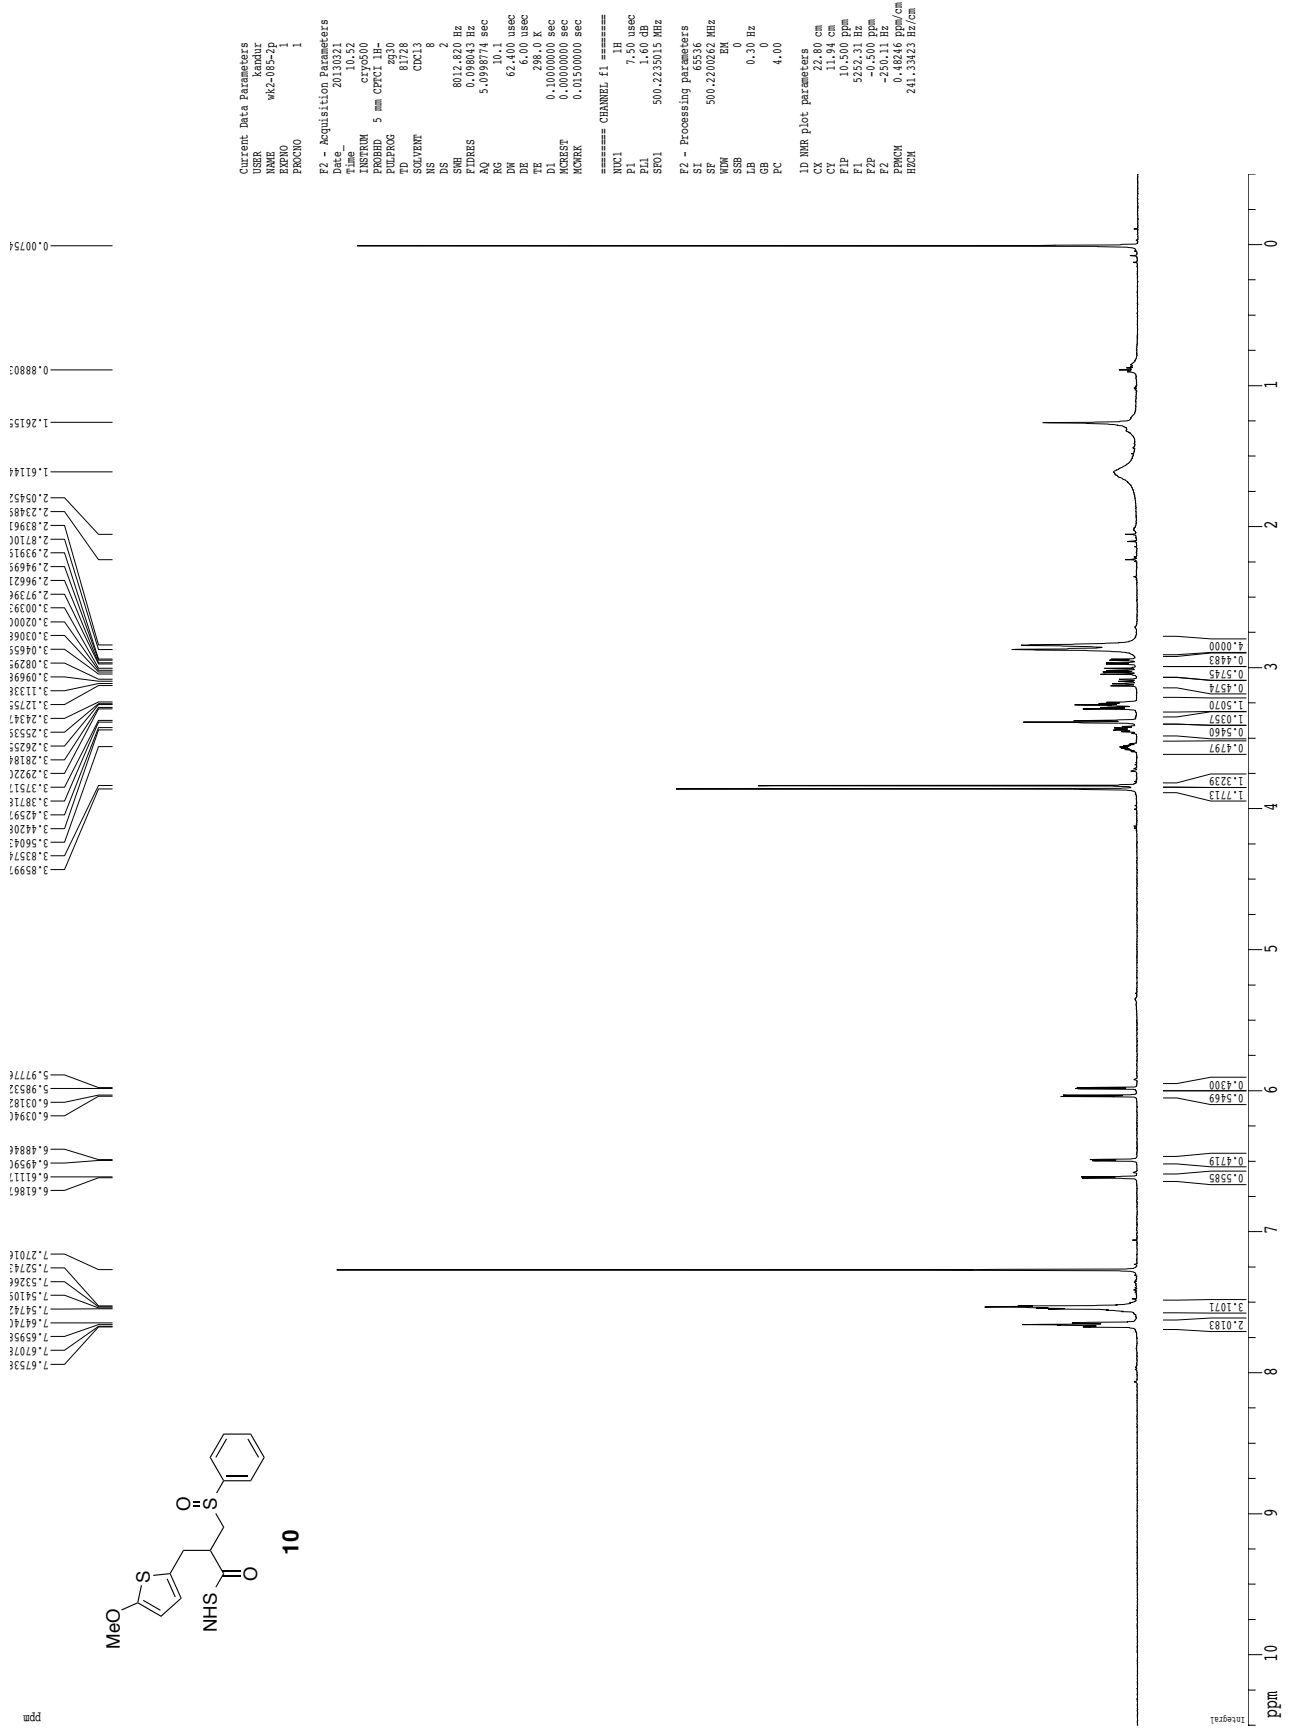

Current Data Parameters  
 USER Kandur  
 INSTR W2-005-10  
 EXPTNO 1  
 PROCNO 1

F2 - Acquisition Parameters  
 Date\_ 20130611  
 Time\_ 12:52  
 INSTRUM crys600  
 PROCNO 5  
 PULPROG zgpg30  
 TD 81728  
 SFO1 500.223015 MHz  
 SOLVENT CDCl3  
 NS 2  
 DS 2  
 SWH 8012.820 Hz  
 FIDRES 0.098043 Hz  
 AQ 5.0998774 sec  
 RG 10.4  
 DE 62.00 usec  
 TE 298.4 K  
 D1 0.10000000 sec  
 ACQST 0.00000000 sec  
 MONK 0.01500000 sec

===== CHANNEL f1 =====  
 NUC1 1H  
 P1 7.50 usec  
 PL1 1.60 dB  
 SFO1 500.223015 MHz

F2 - Processing parameters  
 SI 65536  
 SF 500.220062 MHz  
 WDW EM  
 SSB 0  
 GB 6  
 PC 4.00

ID NMR plot parameters  
 CX 27.80 cm  
 CY 0.00 cm  
 F1 10.500 ppm  
 F2 5252.31 Hz  
 F3 -0.500 ppm  
 F4 -250.11 Hz  
 FWHM 0.46246 ppm/cm  
 ROCK 241.38423 Hz/cm

Z-restored spin-echo 13C spectrum with 1H decoupling

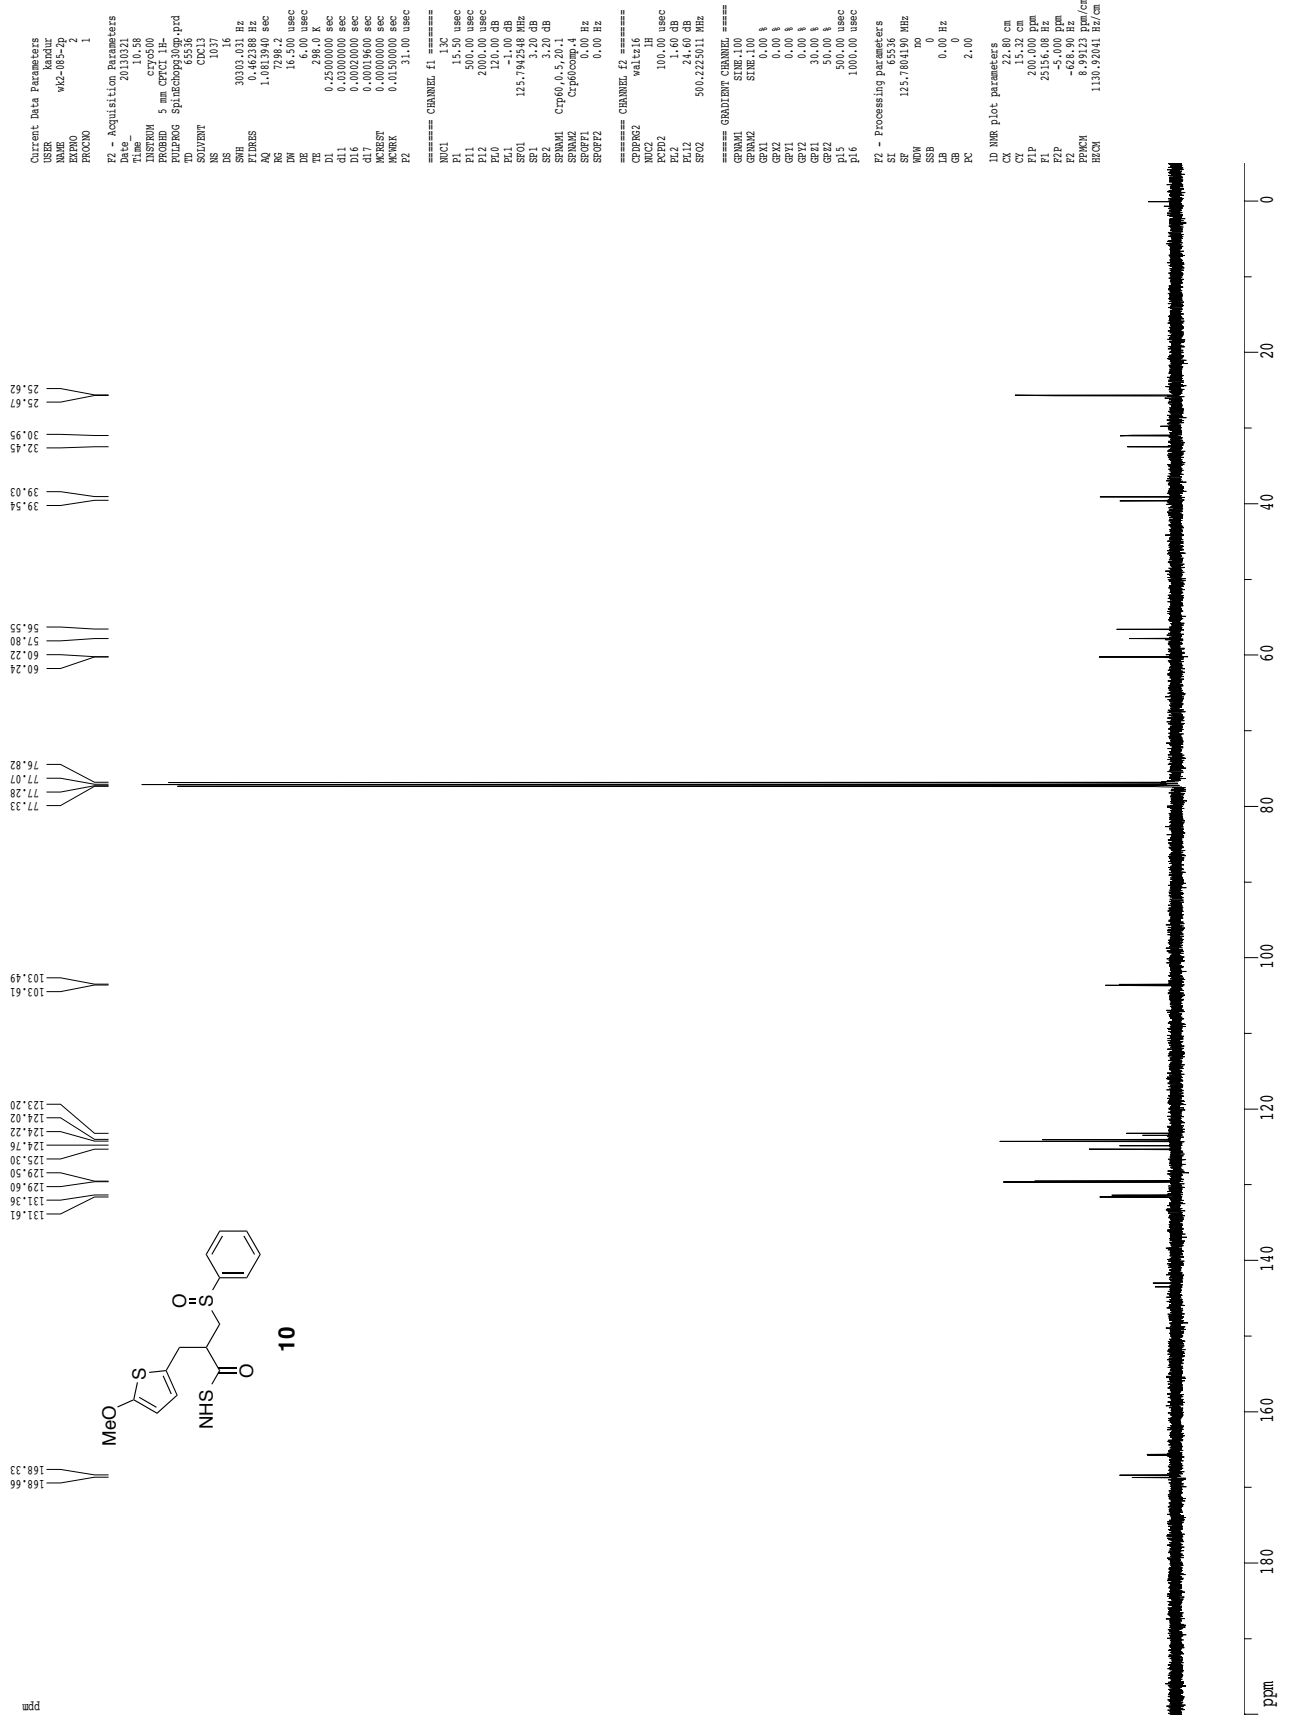

<sup>1</sup>H spectrum

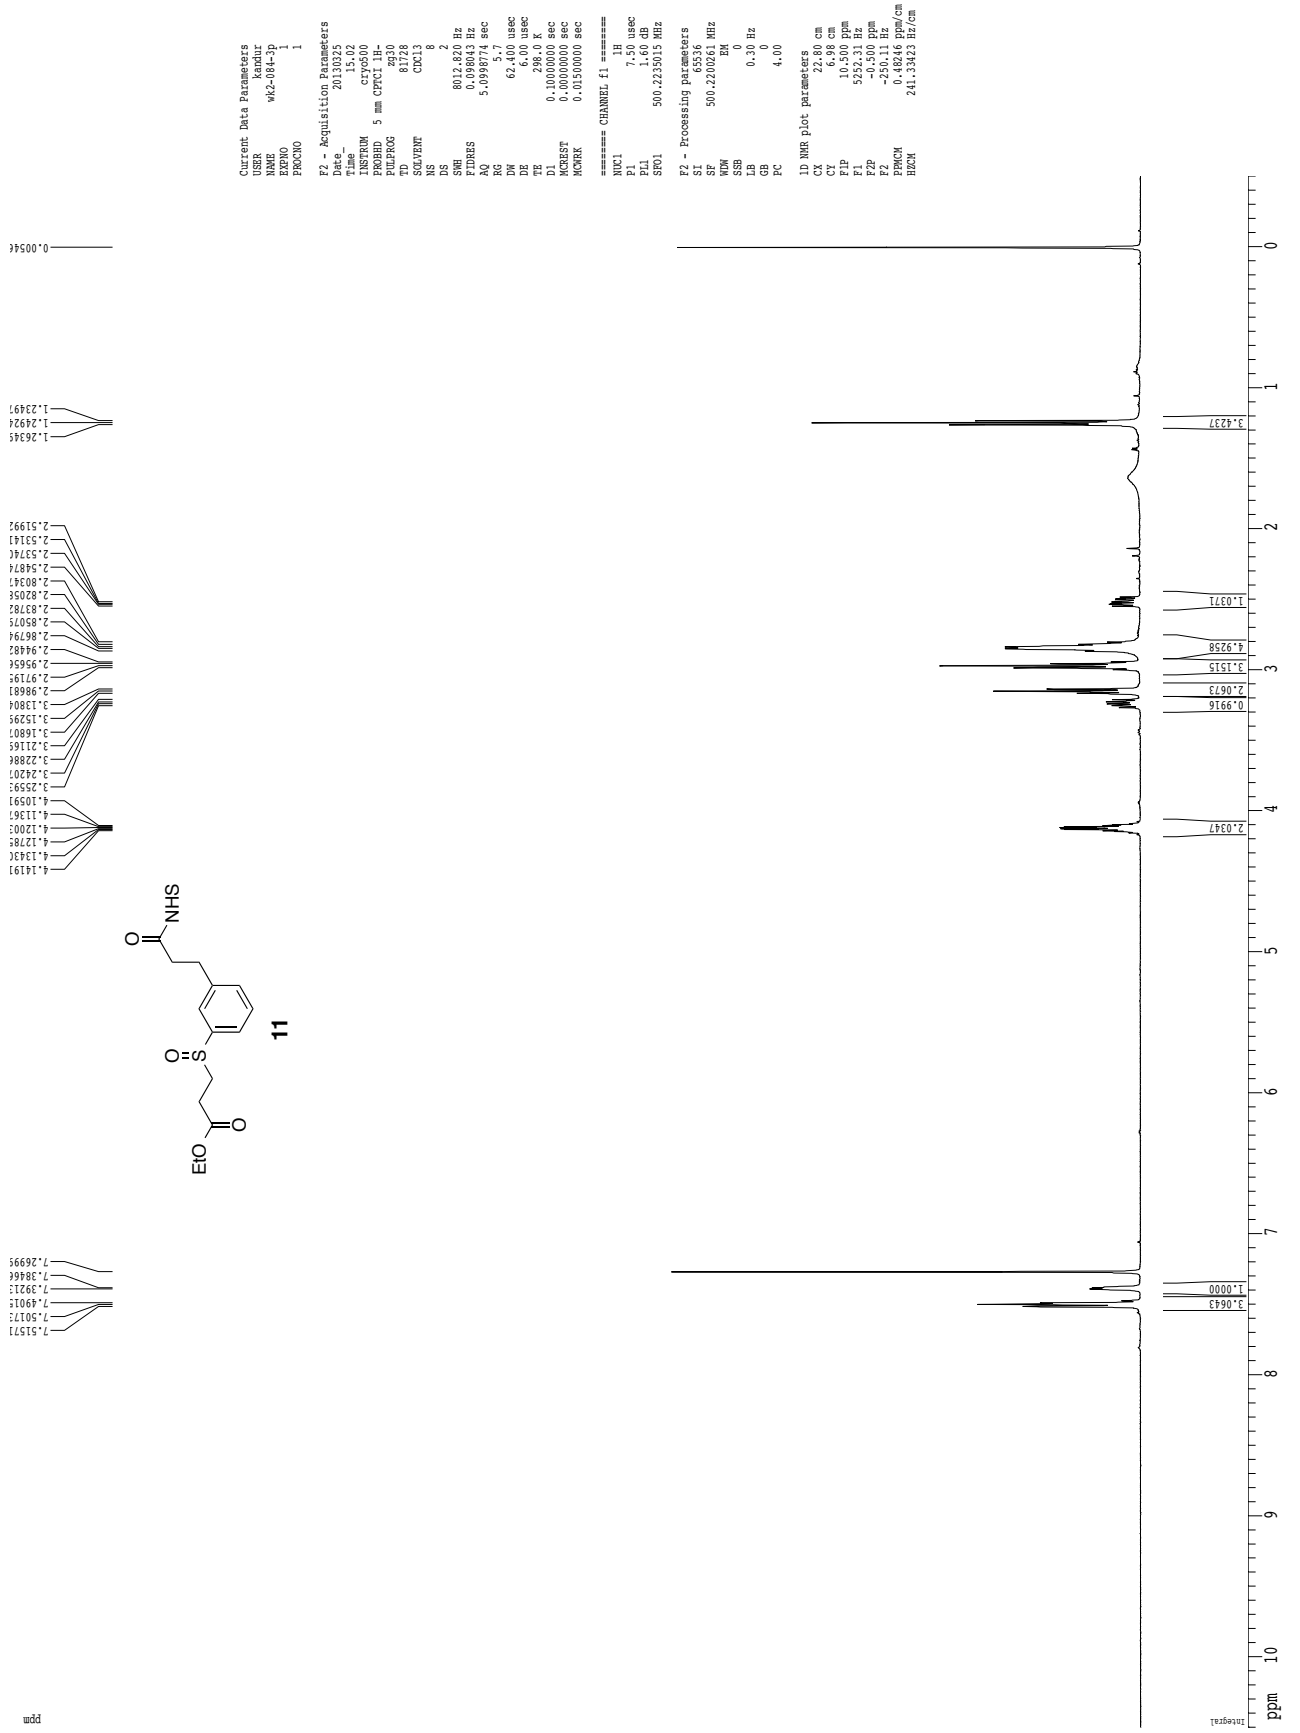



<sup>1</sup>H spectrum

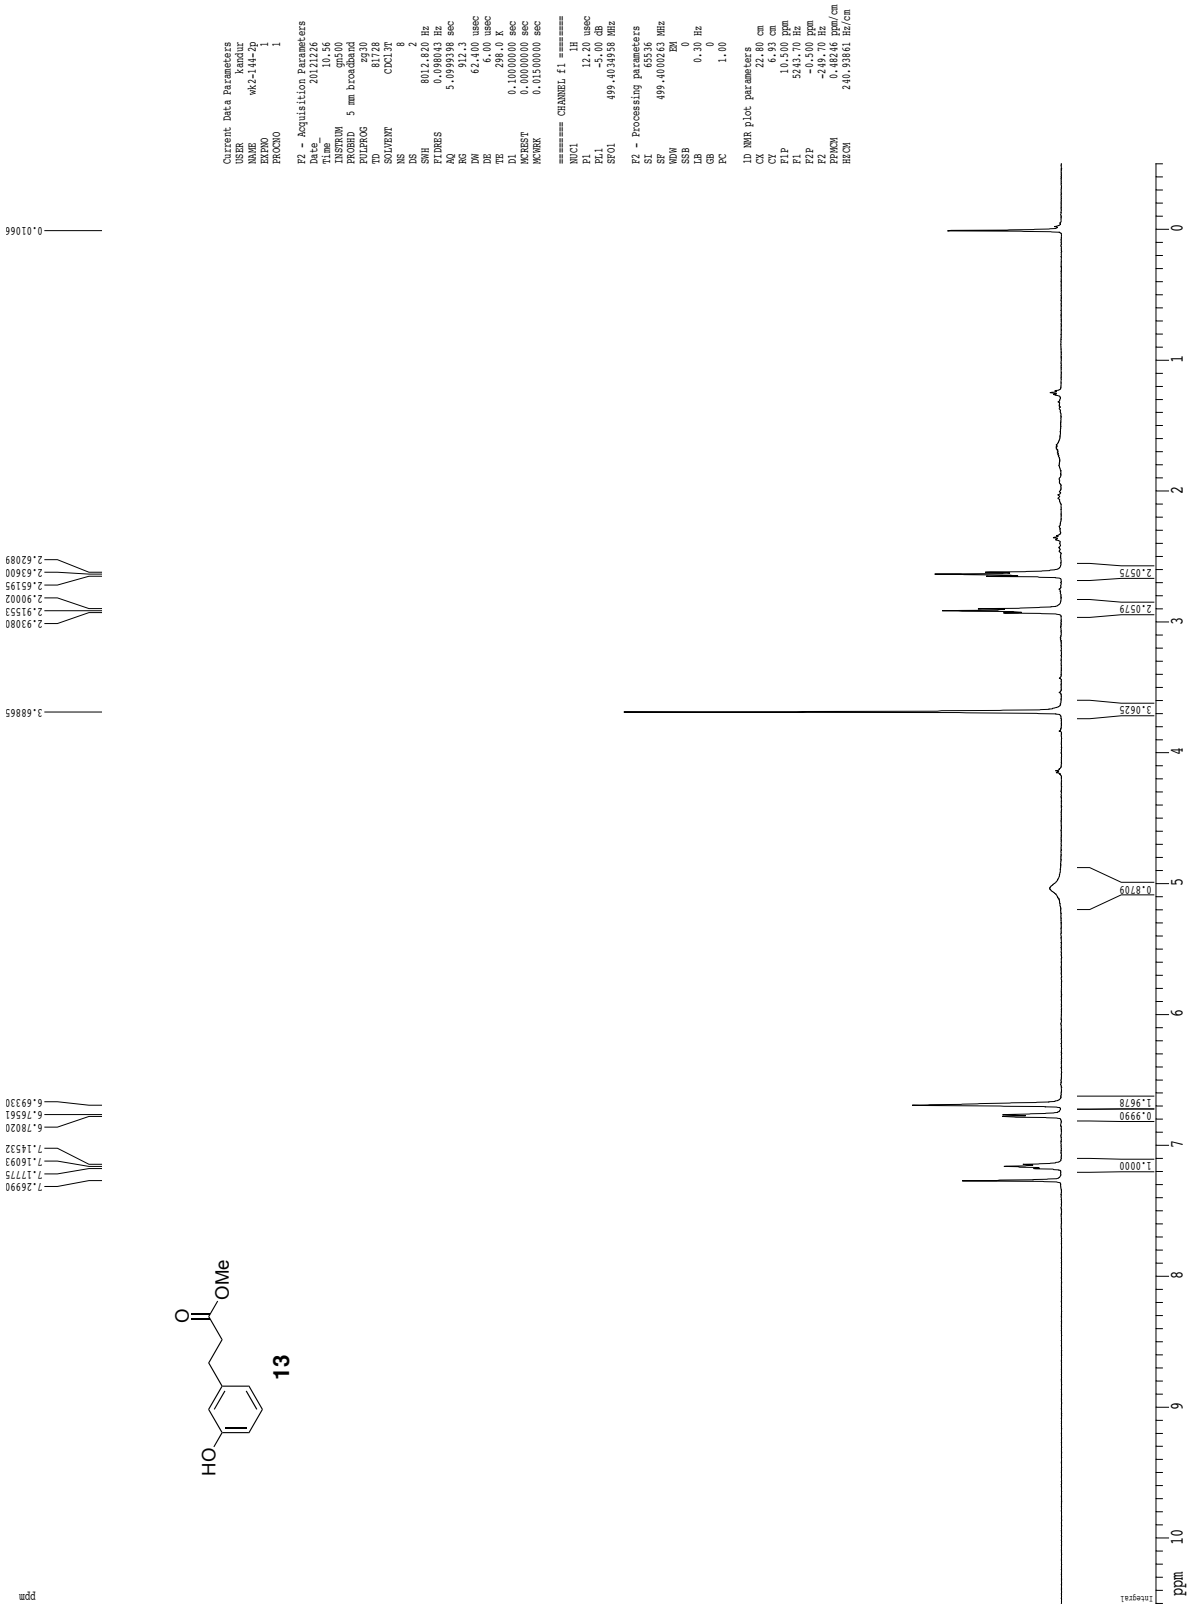

13C spectrum with 1H decoupling

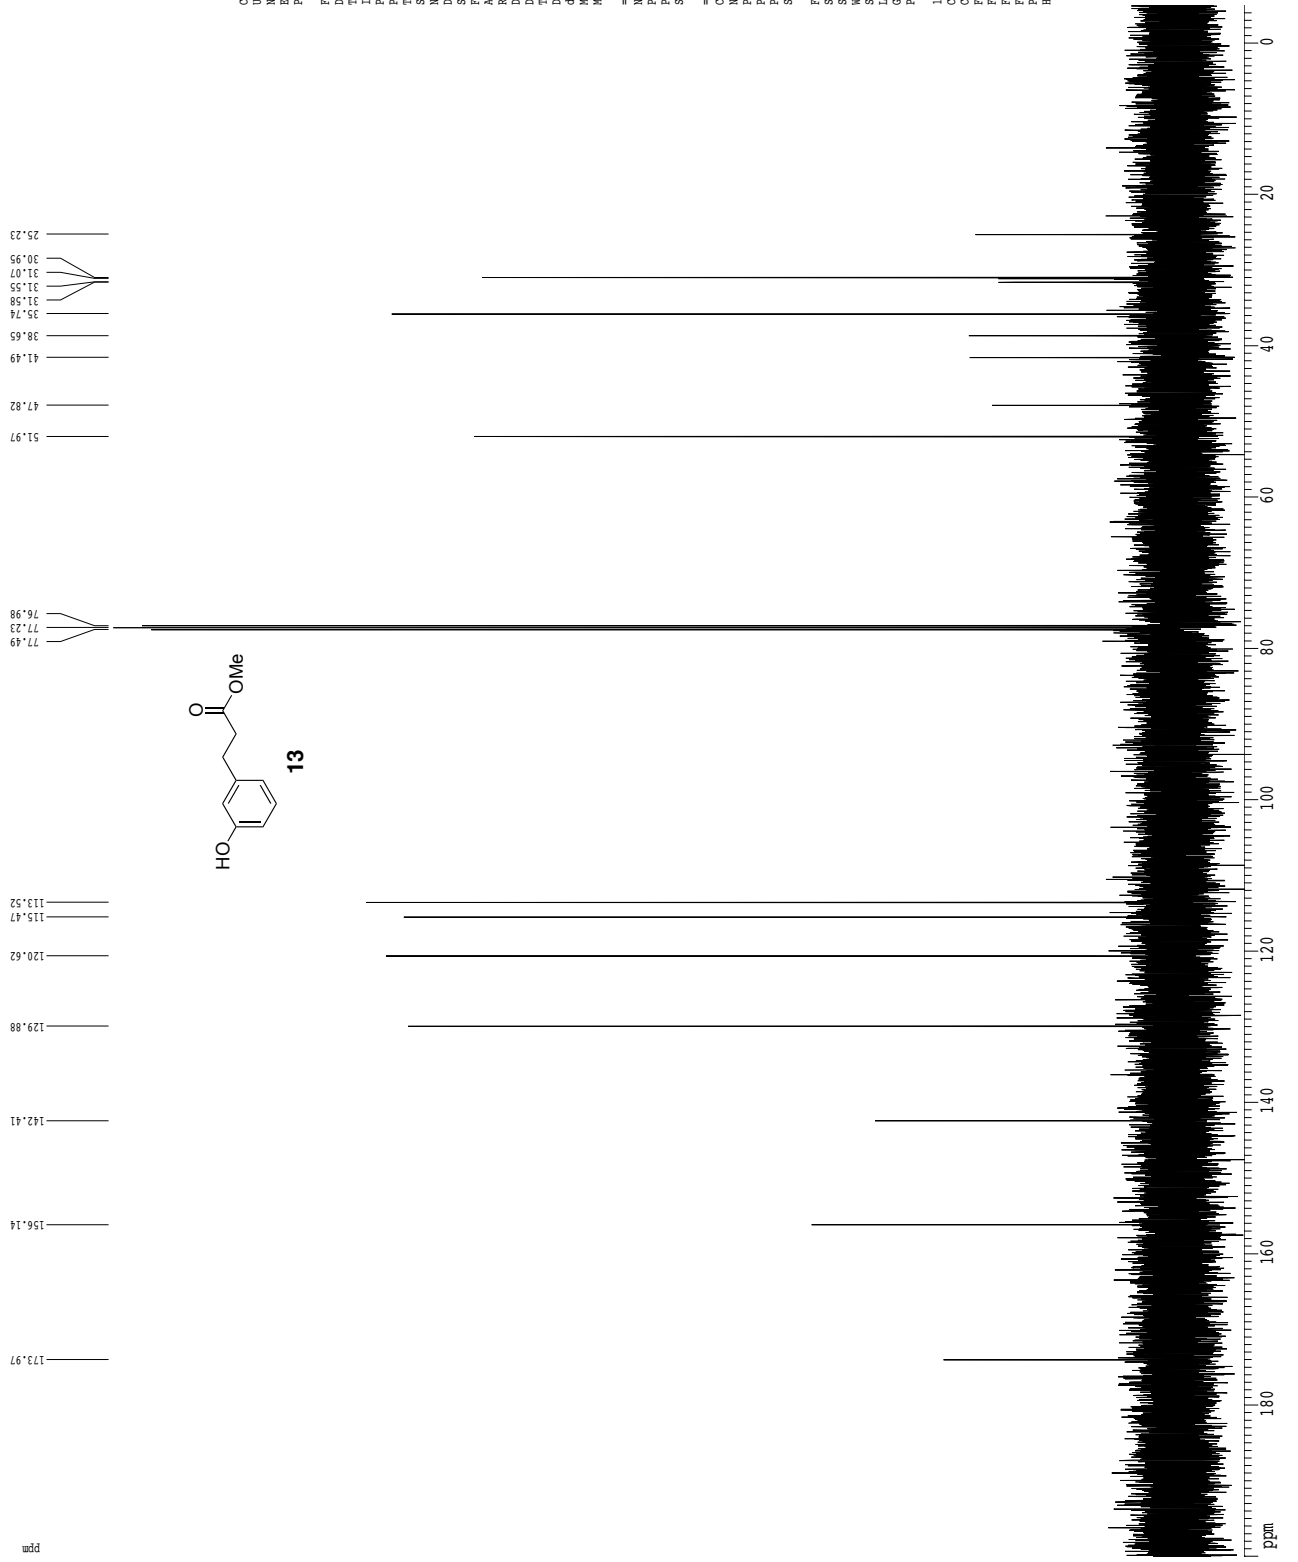

```

Current Data Parameters
USER      kandur
NAME      WD-144-1c
PROCNO    3
PROBNO    1

F2 - Acquisition Parameters
Date_     20121219
Time      17.45
INSTRUM   spect
PROBHD    5 mm Inve
PULPROG   zgpg30
TD         65536
SOLVENT   CDCl3
NS         81
DS         4
SFO1      30303.031 Hz
FIDRES    1.0813940 sec
AQ         1.0813940 sec
RG         4597.6
DM         16.500 usec
DE         4.50 usec
TE         298.0 K
NUC1       13
NUC2       13
PC         0.25000000 sec
d11        0.05000000 sec
MCHRGST   0.00000000 sec
MCHRGK    0.01500000 sec

***** CHANNEL f1 *****
NUC1      13C
P1         12.00 usec
PL1        0.00 dB
SFO1      125.5880432 MHz

***** CHANNEL f2 *****
CPDPRG2   waltz16
NUC2      1H
P2         80.00 usec
PL2        -3.00 dB
SFO2      499.4024970 MHz

F2 - Processing parameters
SI         32768
SF         125.5743229 MHz
WDW        EM
SSB        0
LB         0.00 Hz
GB         0
PC         2.00

ID_NMR plot parameters
CX         22.80 cm
CY         15.65 cm
F1P        200.000 kHz
F2P        25114.84 Hz
ZGPGM      -5.000 ppm
ZGPGP      0.000 ppm
ZGPGK      8.94023 Hz/cm
ZGPGH      1129.06641 Hz/cm
    
```



Z-restored spin-echo 13C spectrum with 1H decoupling

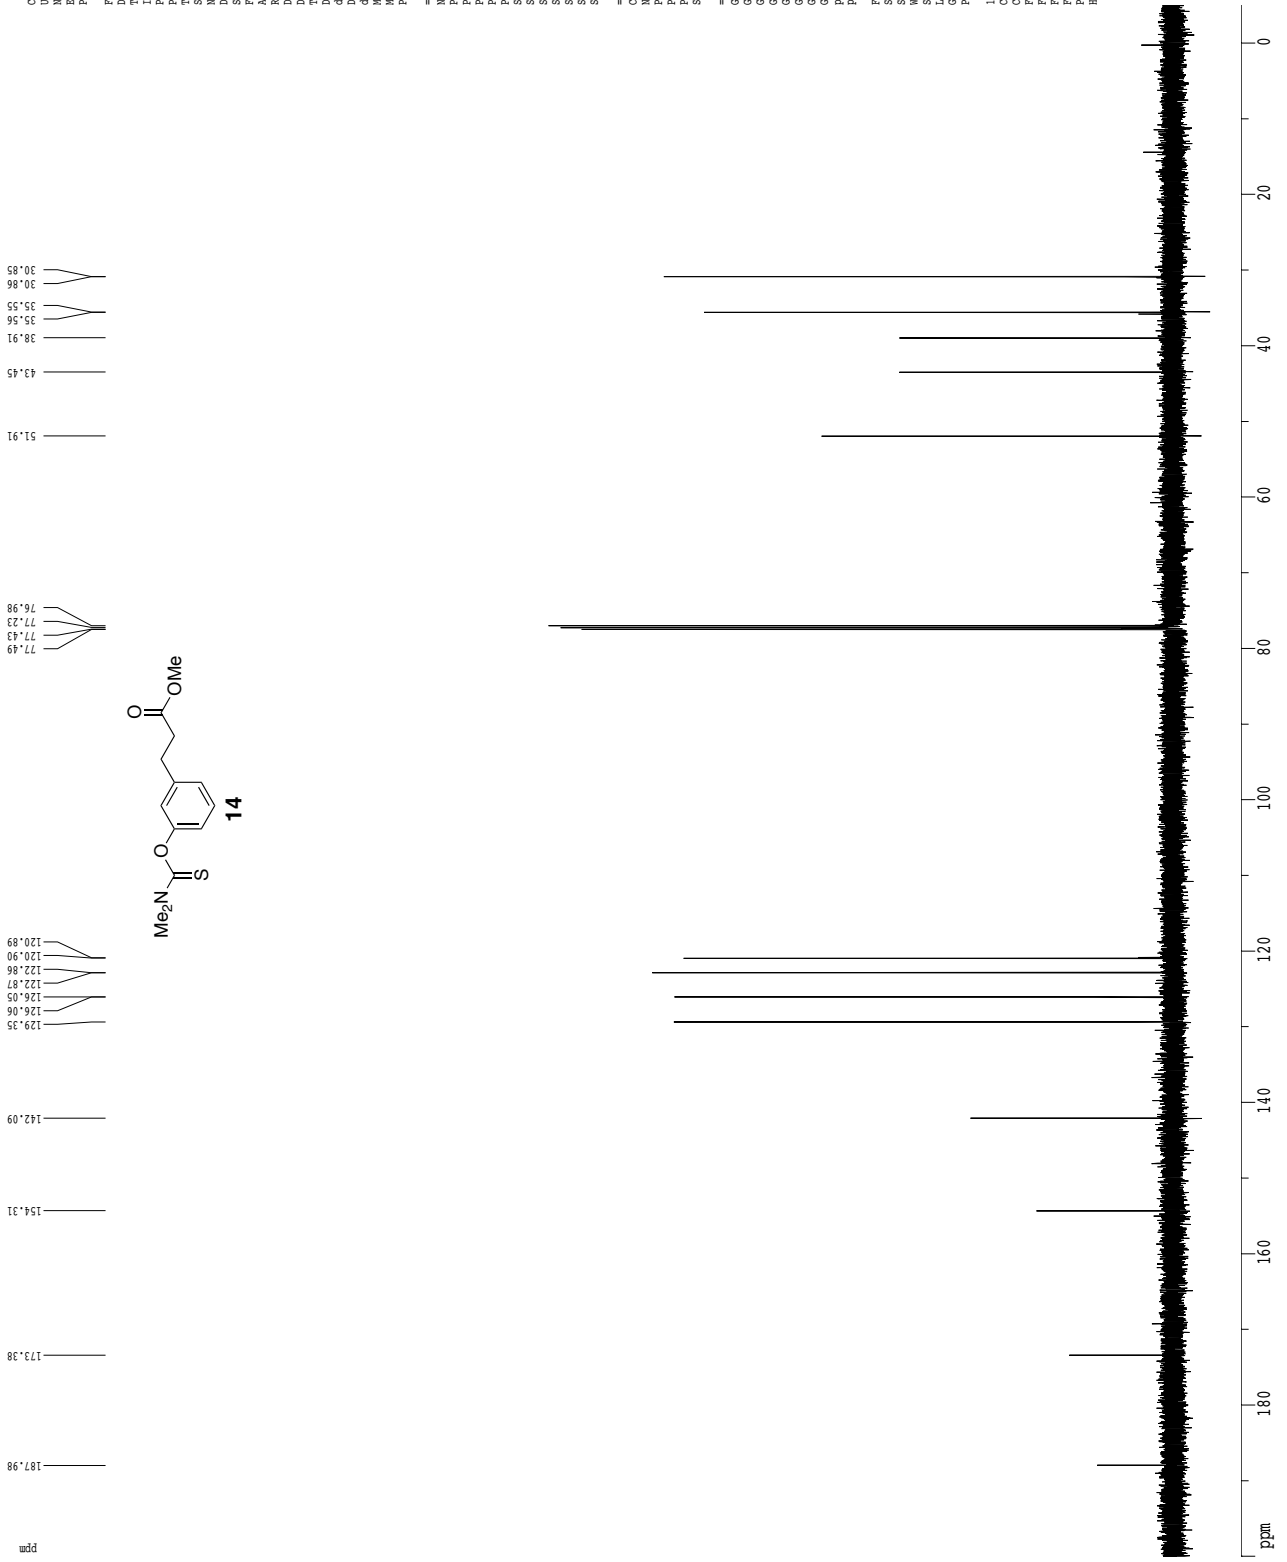

```

Current Data Parameters
=====
USER          Kandur
EXPNO         2
PROCNO       1
F2 - Acquisition Parameters
=====
Date_         20180726
Time         18.35
INSTRUM      crys000
PROBHD       5 mm QNP1H-
PULPROG      zgpg30
SOLVENT      CDCl3
NS           321
DS           16
SHE         30001.031 Bz
FIDRES      0.000185
AQ          1.081340 sec
RG          13004
DE         6.00 usec
TE         300.2 K
NUC1        13C
NUC2        1H
PC          15.50 usec
P1          500.00 usec
P2          2000.00 usec
PCPD        120.00 dB
SFO1        125.764548 MHz
SF2         3.20 dB
SF3         3.20 dB
SFO4        CpPd0.5.20.1
SFO5        CpPd0.5.20.1
SFO6        CpPd0.5.20.1
SFO7        0.00 Bz
SFO8        0.00 Bz
SFO9        0.00 Bz
===== CHANNEL F1 =====
NUC1        13C
P1          15.50 usec
P2          500.00 usec
PCPD        120.00 dB
SFO1        125.764548 MHz
===== CHANNEL F2 =====
CPDPRG2     waltz16
MPC         1H
PCPD2       100.00 usec
P2.2        1.60 dB
P1.2        24.60 dB
SFO2        500.225011 MHz
===== GRADIENT CHANNEL =====
GPM1H       STINE.1.00
GPM1Z       STINE.1.00
GPM2H       0.00 %
GPM2Z       0.00 %
GPM3H       0.00 %
GPM3Z       0.00 %
GPM4H       0.00 %
GPM4Z       0.00 %
GPM5H       0.00 %
GPM5Z       0.00 %
GPM6H       0.00 %
GPM6Z       0.00 %
GPM7H       0.00 %
GPM7Z       0.00 %
GPM8H       0.00 %
GPM8Z       0.00 %
===== Processing parameters =====
SI          125.764602 MHz
WDW         no
SSB         0
GB          0
PC          2.00
ID NMR plot parameters
=====
CX          22.80 cm
PIF         200.000 PPM
F1          25156.08 Bz
F2          -5.000 PPM
F3          -6284.91 Bz
F4          6284.91 Bz/cm
HSCON      1130.82029 Bz/cm
    
```



<sup>1</sup>H spectrum

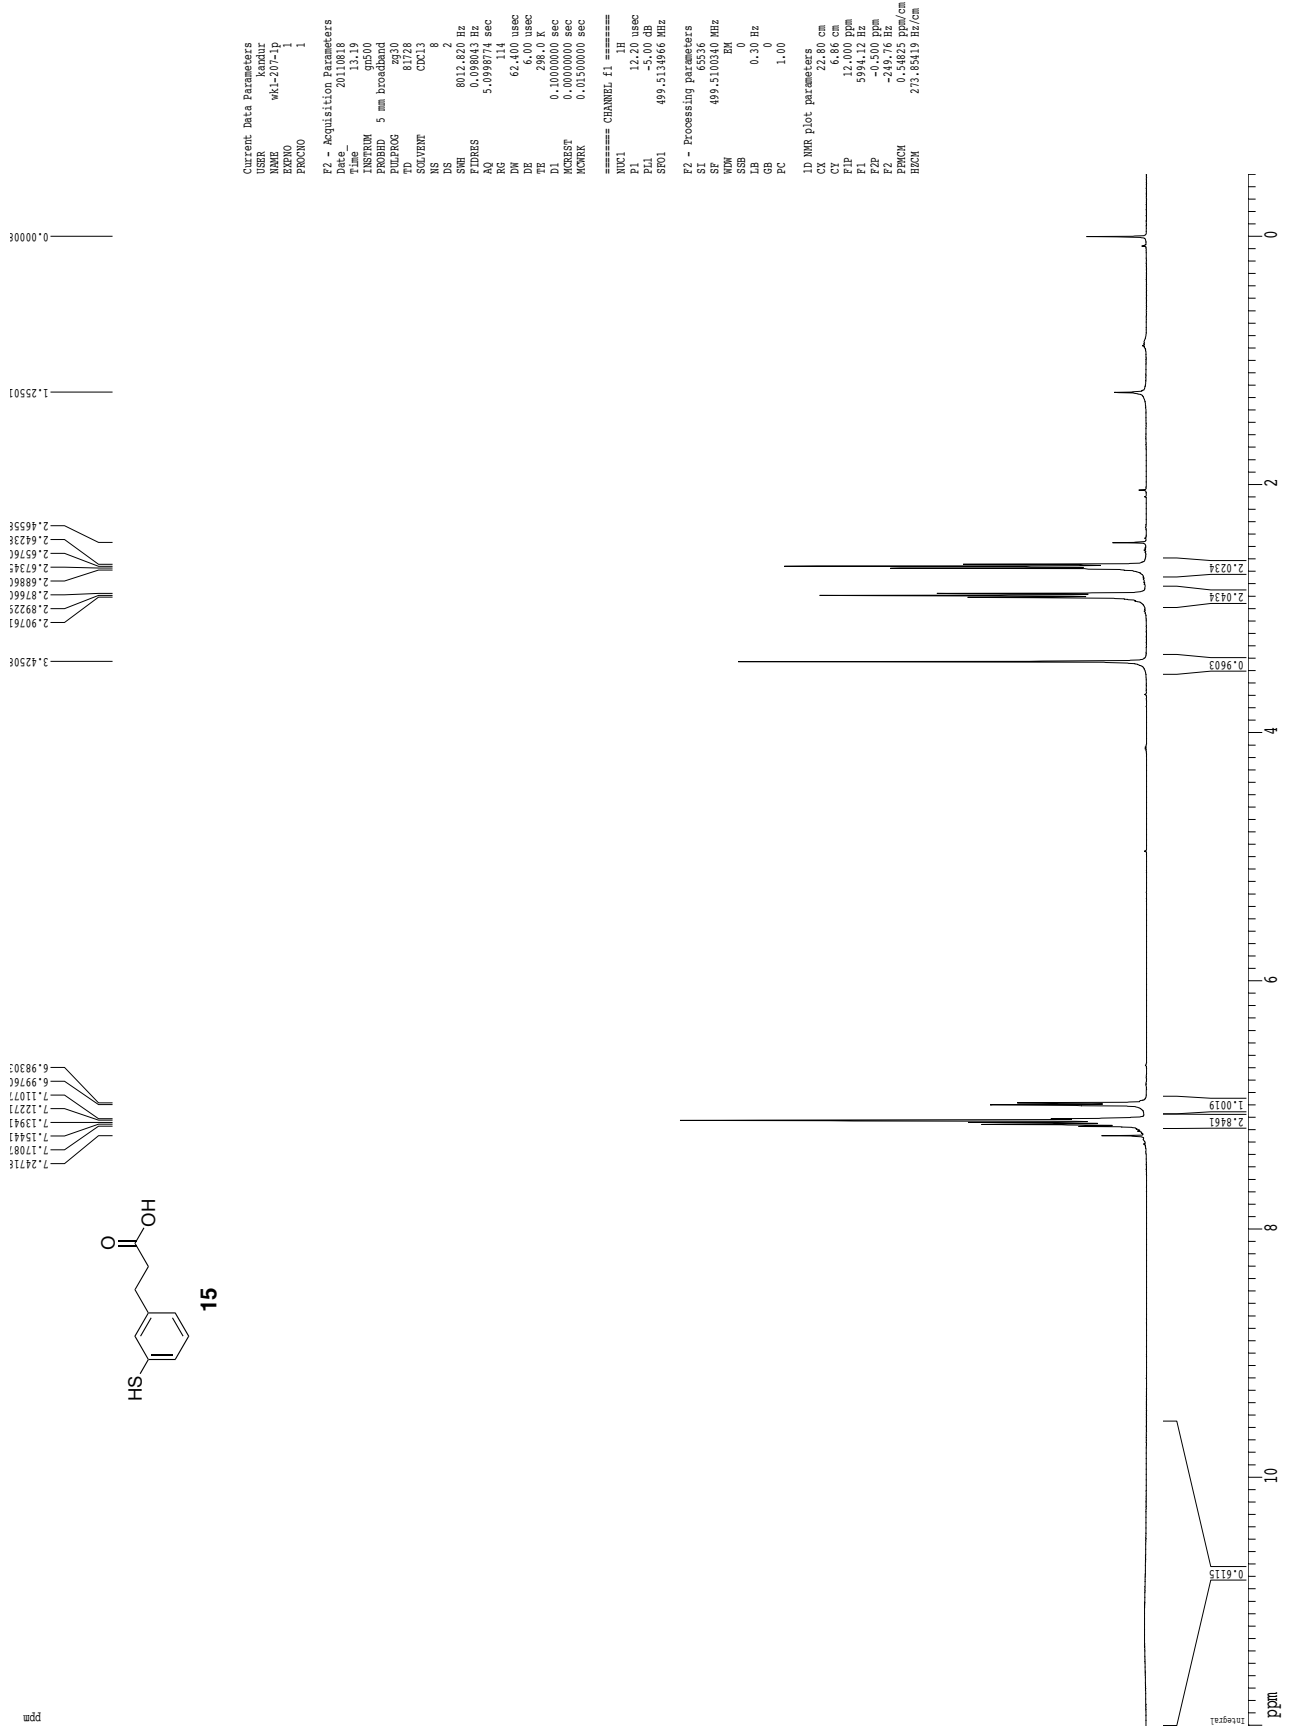



<sup>1</sup>H spectrum

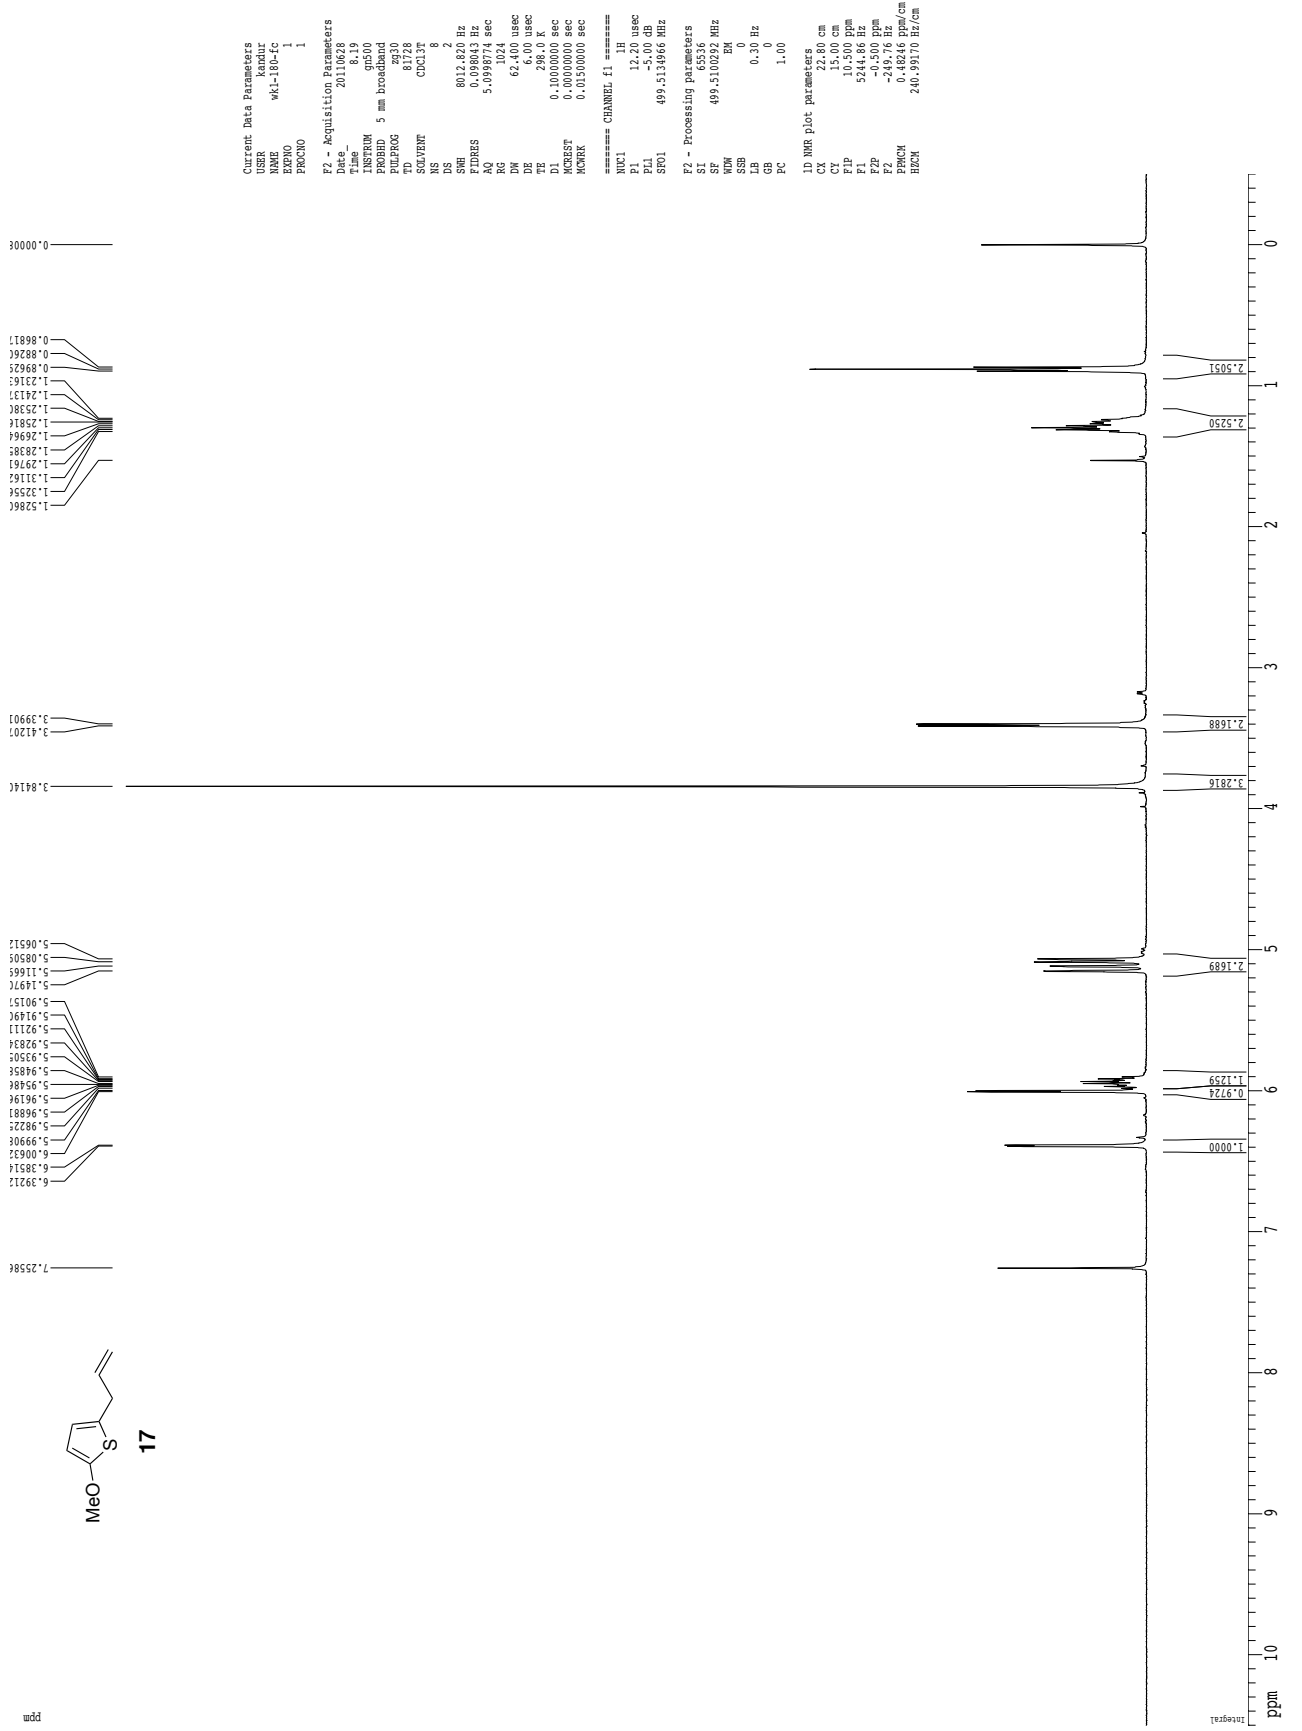

Z-restored spin-echo 13C spectrum with 1H decoupling

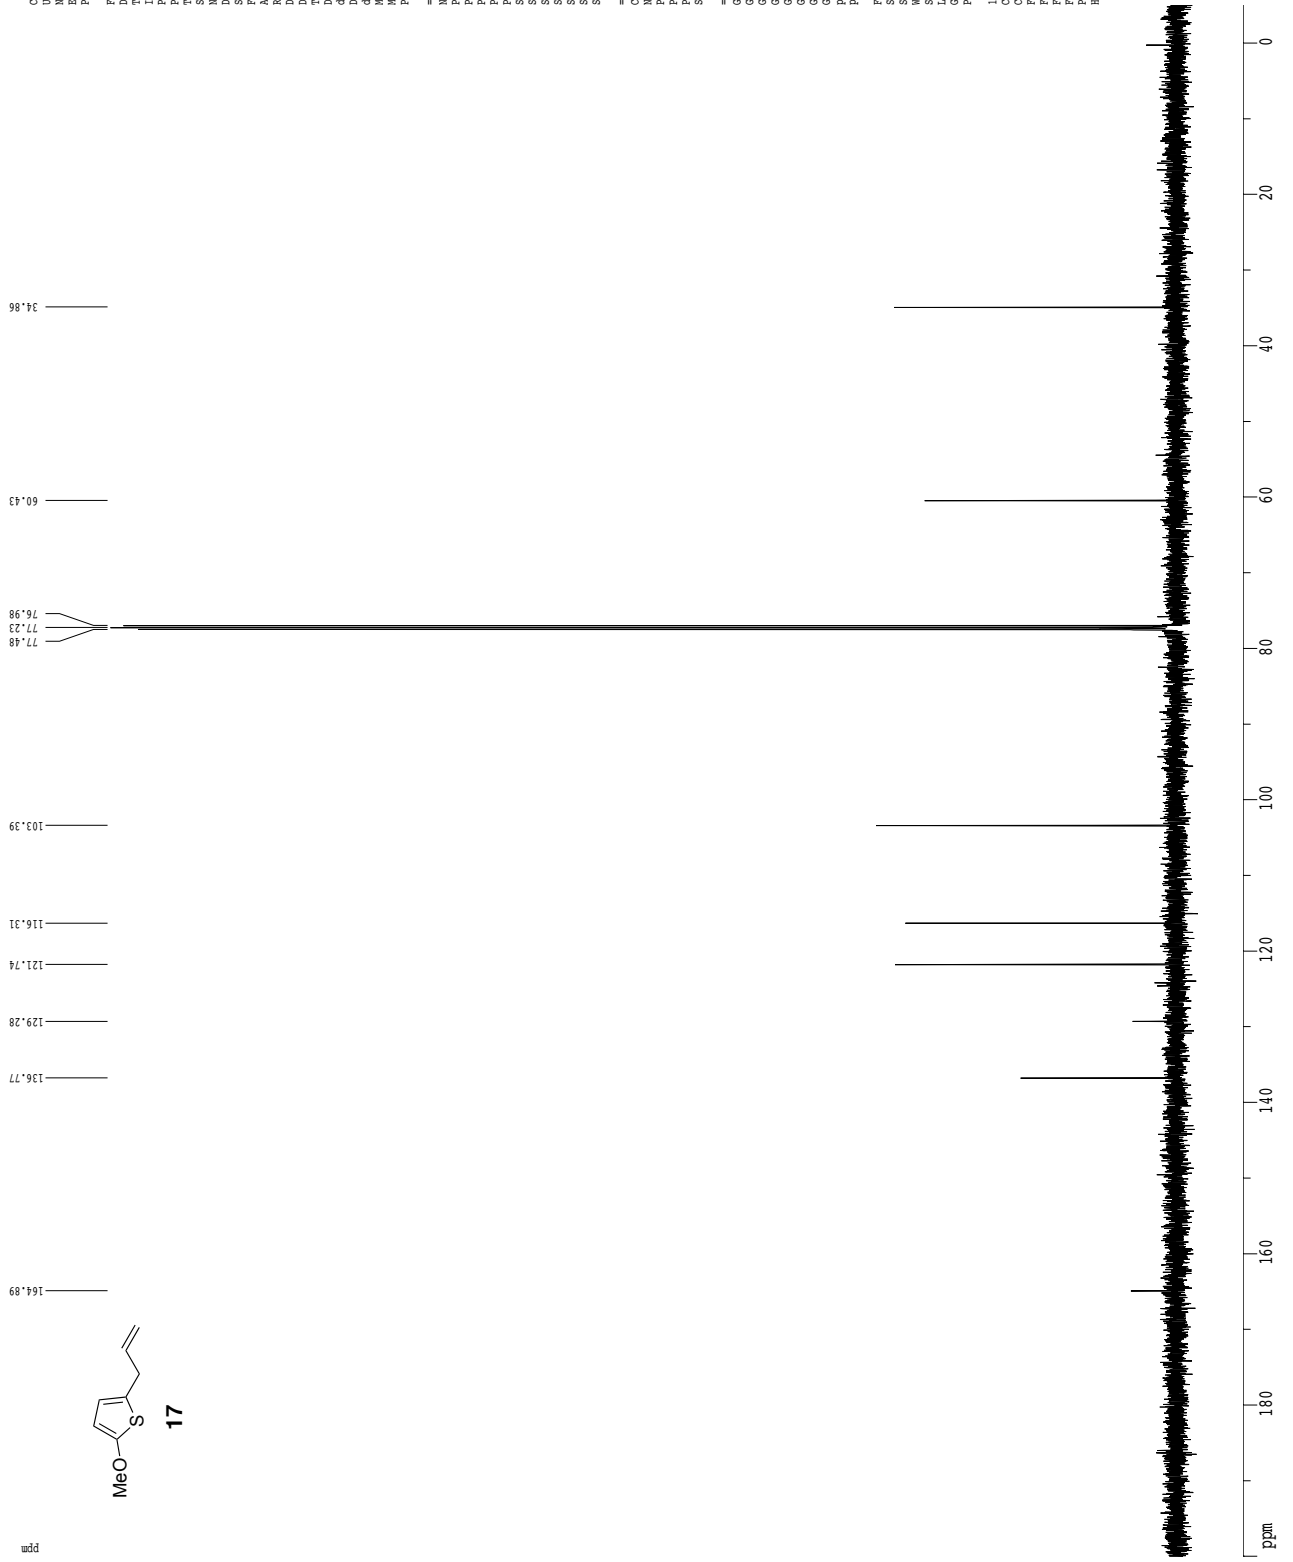

```

Current Data Parameters
=====
USER          Kandur
EXPNO         3
PROCNO       1
F2 - Acquisition Parameters
=====
Date_         20160808
Time         12:26
INSTRUM      cryo500
PROBHD       5 mm CPYCI 1H-
PULPROG      zgpg30
SOLVENT      CDCl3
NS           216
DS           16
SHF          300.0101 Bz
NUC1         13
NUC2         13
AQ           1.041340 sec
RG           298.2
AQ           16.200 usec
DE           6.00 usec
DI           0.2500000 sec
DL1          0.0300000 sec
DL2          0.0002000 sec
DL3          0.0003000 sec
DL4          0.0003000 sec
DL5          0.0003000 sec
DL6          0.0003000 sec
DL7          0.0003000 sec
DL8          0.0003000 sec
DL9          0.0003000 sec
DL10         0.0003000 sec
DL11         0.0003000 sec
DL12         0.0003000 sec
DL13         0.0003000 sec
DL14         0.0003000 sec
DL15         0.0003000 sec
DL16         0.0003000 sec
DL17         0.0003000 sec
DL18         0.0003000 sec
DL19         0.0003000 sec
DL20         0.0003000 sec
DL21         0.0003000 sec
DL22         0.0003000 sec
DL23         0.0003000 sec
DL24         0.0003000 sec
DL25         0.0003000 sec
DL26         0.0003000 sec
DL27         0.0003000 sec
DL28         0.0003000 sec
DL29         0.0003000 sec
DL30         0.0003000 sec
DL31         0.0003000 sec
DL32         0.0003000 sec
DL33         0.0003000 sec
DL34         0.0003000 sec
DL35         0.0003000 sec
DL36         0.0003000 sec
DL37         0.0003000 sec
DL38         0.0003000 sec
DL39         0.0003000 sec
DL40         0.0003000 sec
DL41         0.0003000 sec
DL42         0.0003000 sec
DL43         0.0003000 sec
DL44         0.0003000 sec
DL45         0.0003000 sec
DL46         0.0003000 sec
DL47         0.0003000 sec
DL48         0.0003000 sec
DL49         0.0003000 sec
DL50         0.0003000 sec
=====
===== CHANNEL F1 =====
NUC1         13
NUC2         13
P1           15.50 usec
P11          500.00 usec
P12          2000.00 usec
P13          120.00 dB
P14          120.00 dB
SFO1         125.762548 MHz
SF1          3.20 dB
SF2          3.20 dB
SFO2         125.762548 MHz
SF1          3.20 dB
SFO1         125.762548 MHz
SF2          3.20 dB
SFO2         125.762548 MHz
=====
===== CHANNEL F2 =====
=====
===== GRADIENT CHANNEL =====
CPDPRG2      waltz16
MPCO         1H
PCPD2        100.00 usec
PL1          1.60 dB
PL2          24.60 dB
SFO2         500.222811 MHz
=====
===== GRADIENT CHANNEL =====
CPDPRG1      STINE.100
CPDPRG2      STINE.100
CPDPRG3      STINE.100
CPDPRG4      STINE.100
CPDPRG5      STINE.100
CPDPRG6      STINE.100
CPDPRG7      STINE.100
CPDPRG8      STINE.100
CPDPRG9      STINE.100
CPDPRG10     STINE.100
CPDPRG11     STINE.100
CPDPRG12     STINE.100
CPDPRG13     STINE.100
CPDPRG14     STINE.100
CPDPRG15     STINE.100
CPDPRG16     STINE.100
CPDPRG17     STINE.100
CPDPRG18     STINE.100
CPDPRG19     STINE.100
CPDPRG20     STINE.100
CPDPRG21     STINE.100
CPDPRG22     STINE.100
CPDPRG23     STINE.100
CPDPRG24     STINE.100
CPDPRG25     STINE.100
CPDPRG26     STINE.100
CPDPRG27     STINE.100
CPDPRG28     STINE.100
CPDPRG29     STINE.100
CPDPRG30     STINE.100
CPDPRG31     STINE.100
CPDPRG32     STINE.100
CPDPRG33     STINE.100
CPDPRG34     STINE.100
CPDPRG35     STINE.100
CPDPRG36     STINE.100
CPDPRG37     STINE.100
CPDPRG38     STINE.100
CPDPRG39     STINE.100
CPDPRG40     STINE.100
CPDPRG41     STINE.100
CPDPRG42     STINE.100
CPDPRG43     STINE.100
CPDPRG44     STINE.100
CPDPRG45     STINE.100
CPDPRG46     STINE.100
CPDPRG47     STINE.100
CPDPRG48     STINE.100
CPDPRG49     STINE.100
CPDPRG50     STINE.100
=====
F2 - Processing parameters
=====
SI           125.763688 MHz
SF           125.763688 MHz
WDW          EM
SSB          0
LB           1.00 Bz
GB           0
PC           2.00
=====
ID NMR plot parameters
=====
CX           22.80 cm
CY           22.80 cm
CZ           22.80 cm
FIDP         200.000 ppm
F1           25156.08 Bz
F2           -5.000 ppm
F3           -6284.91 Bz
F4           1130.82029 Hz/cm
F5           1130.82029 Hz/cm
=====

```

<sup>1</sup>H spectrum

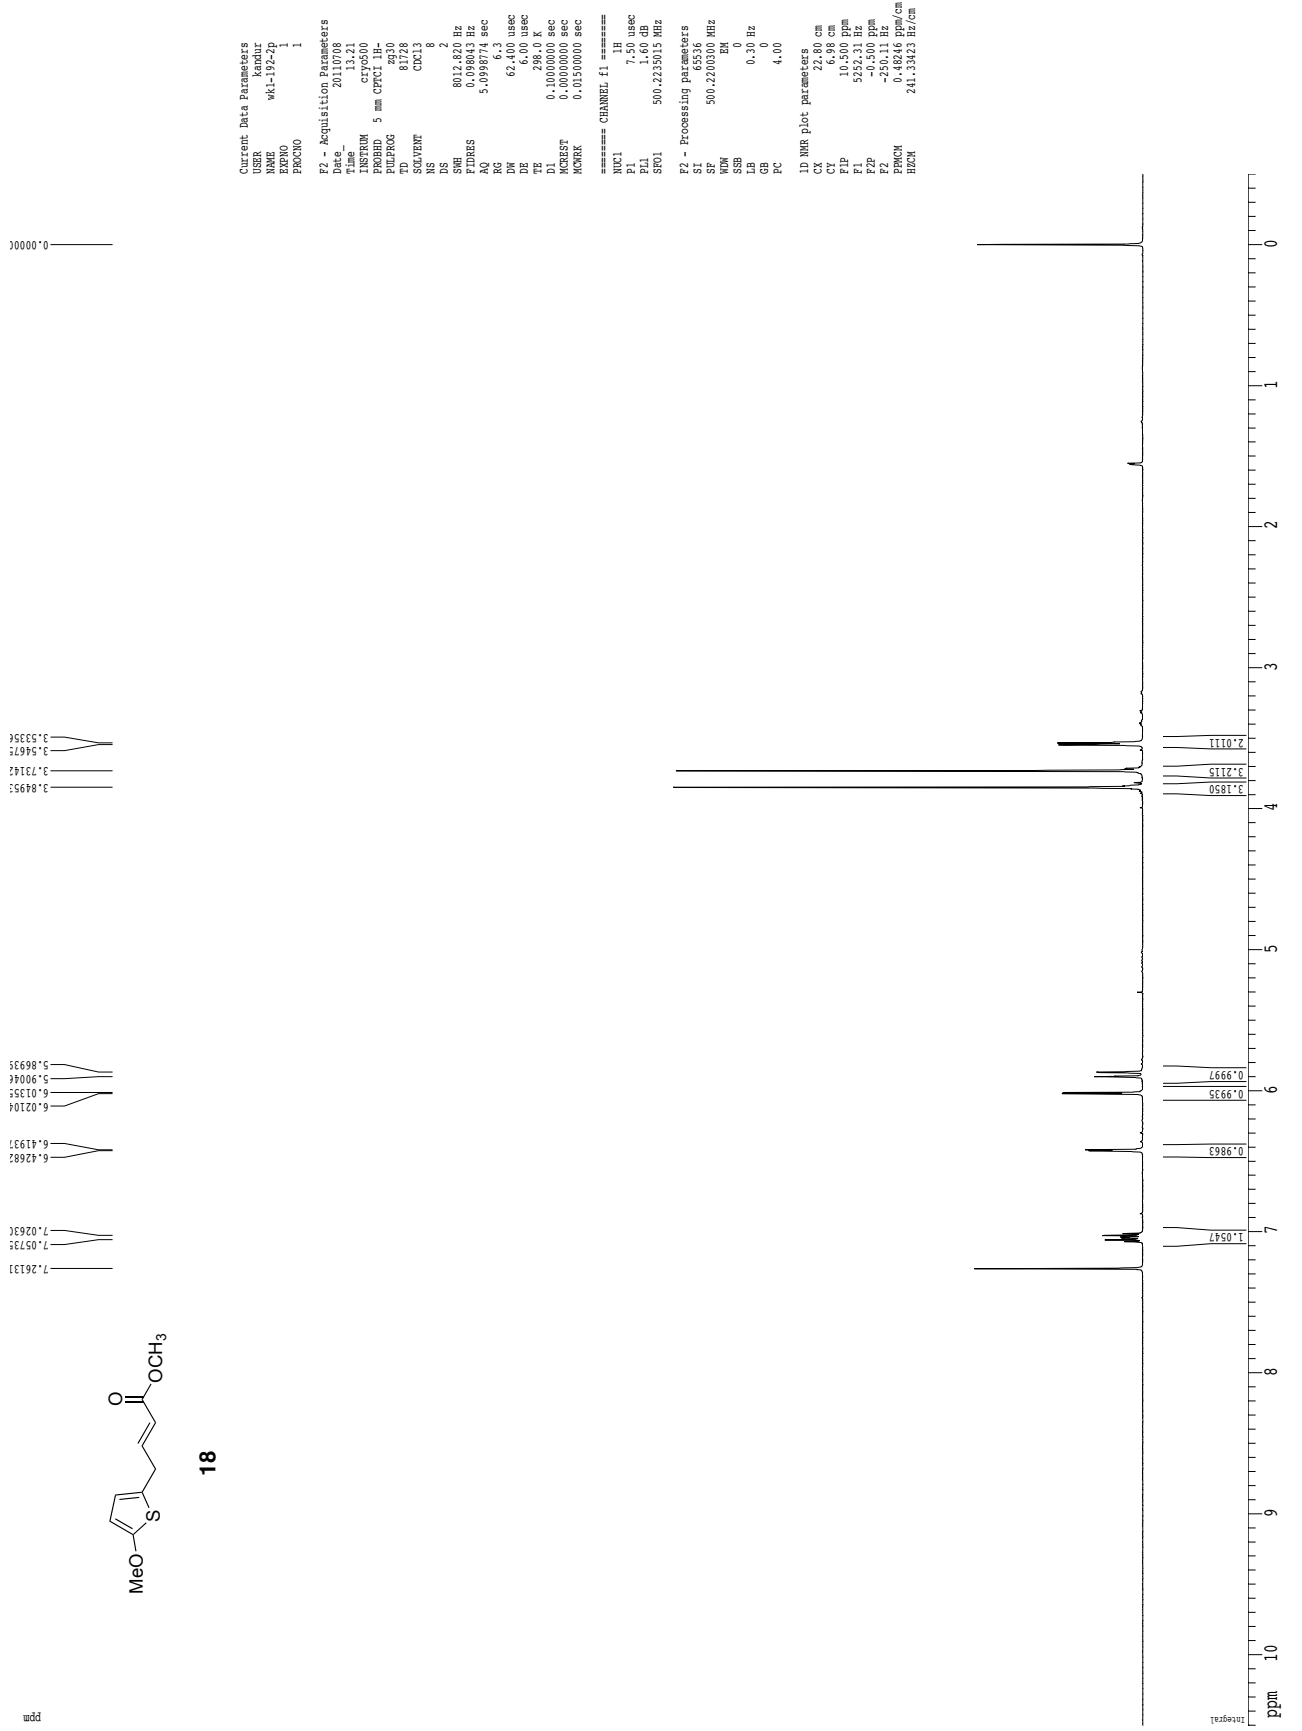

18

Z-restored spin-echo 13C spectrum with 1H decoupling

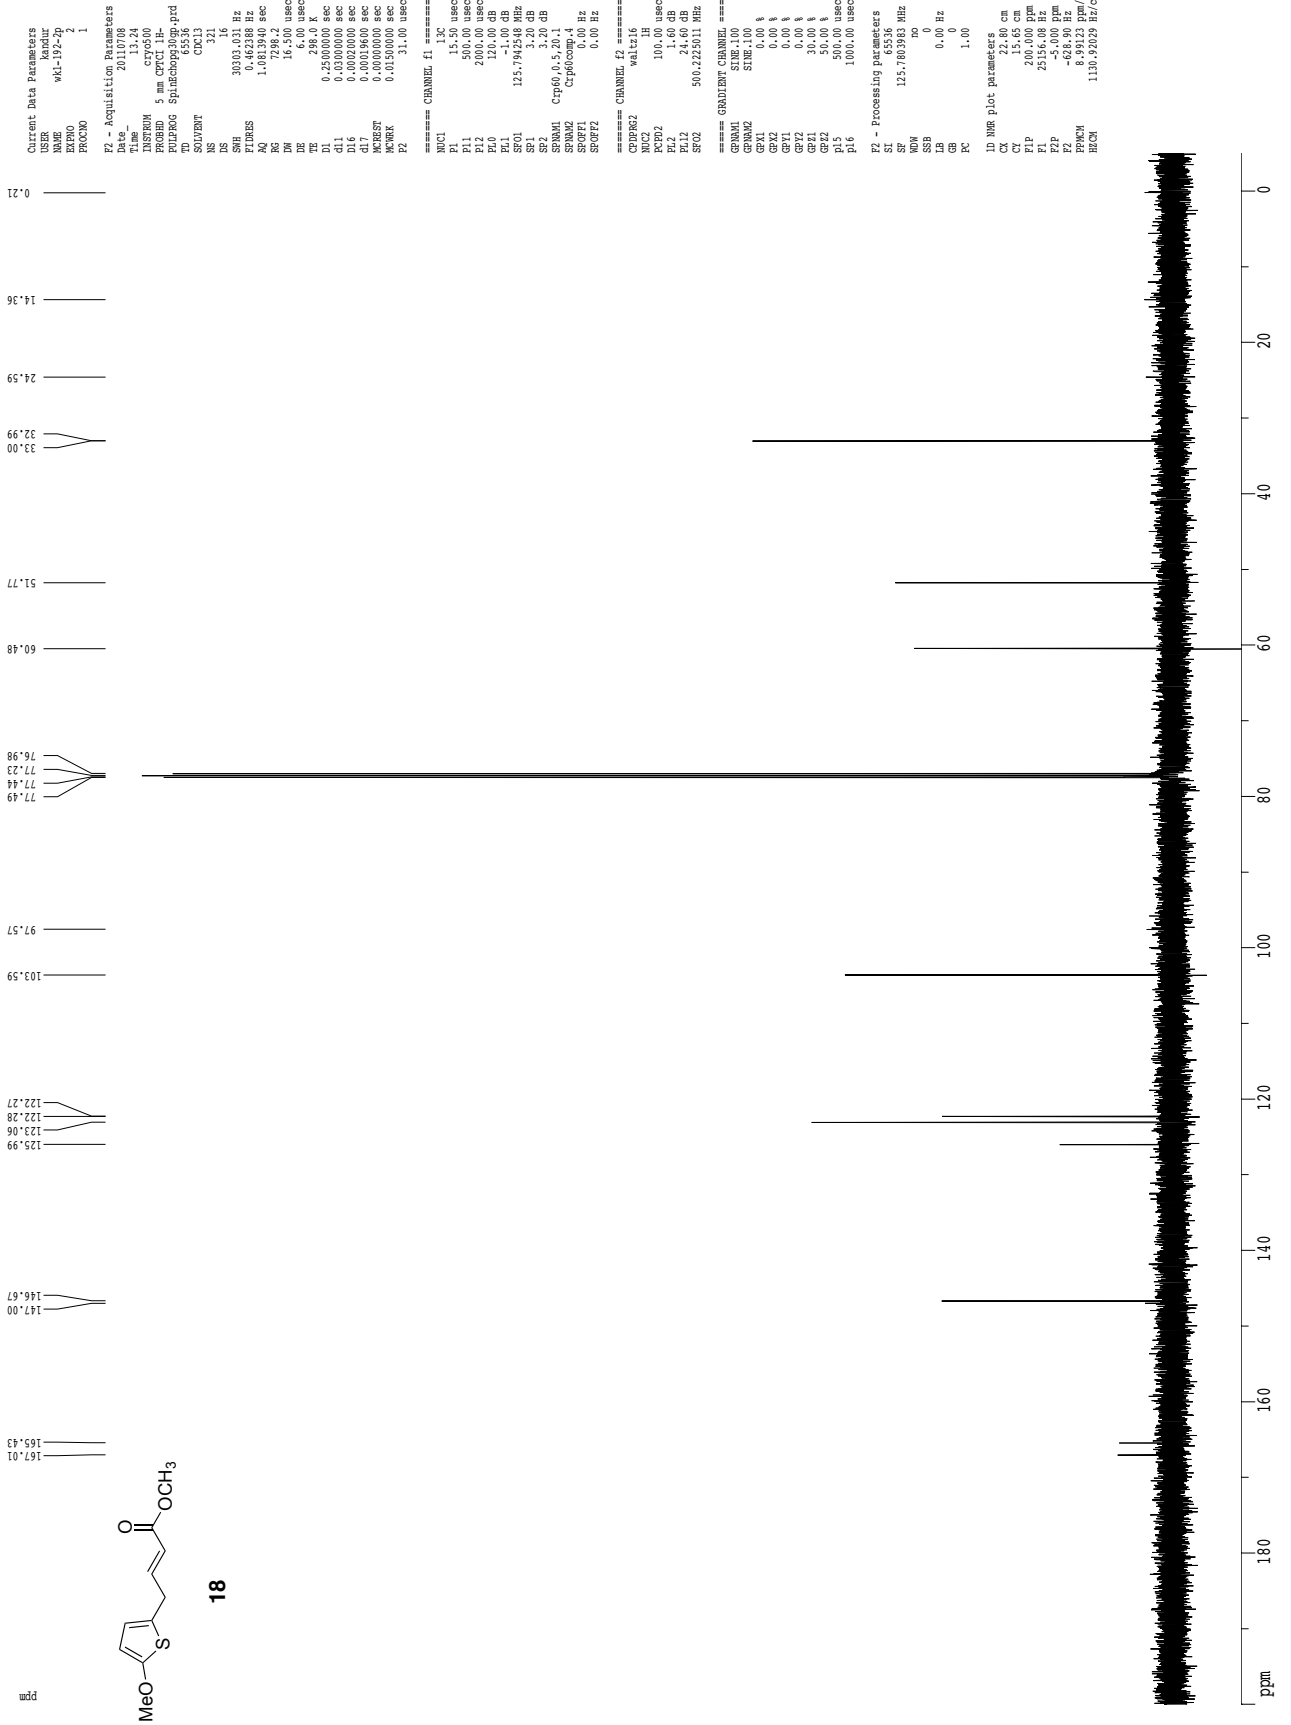

18

<sup>1</sup>H spectrum

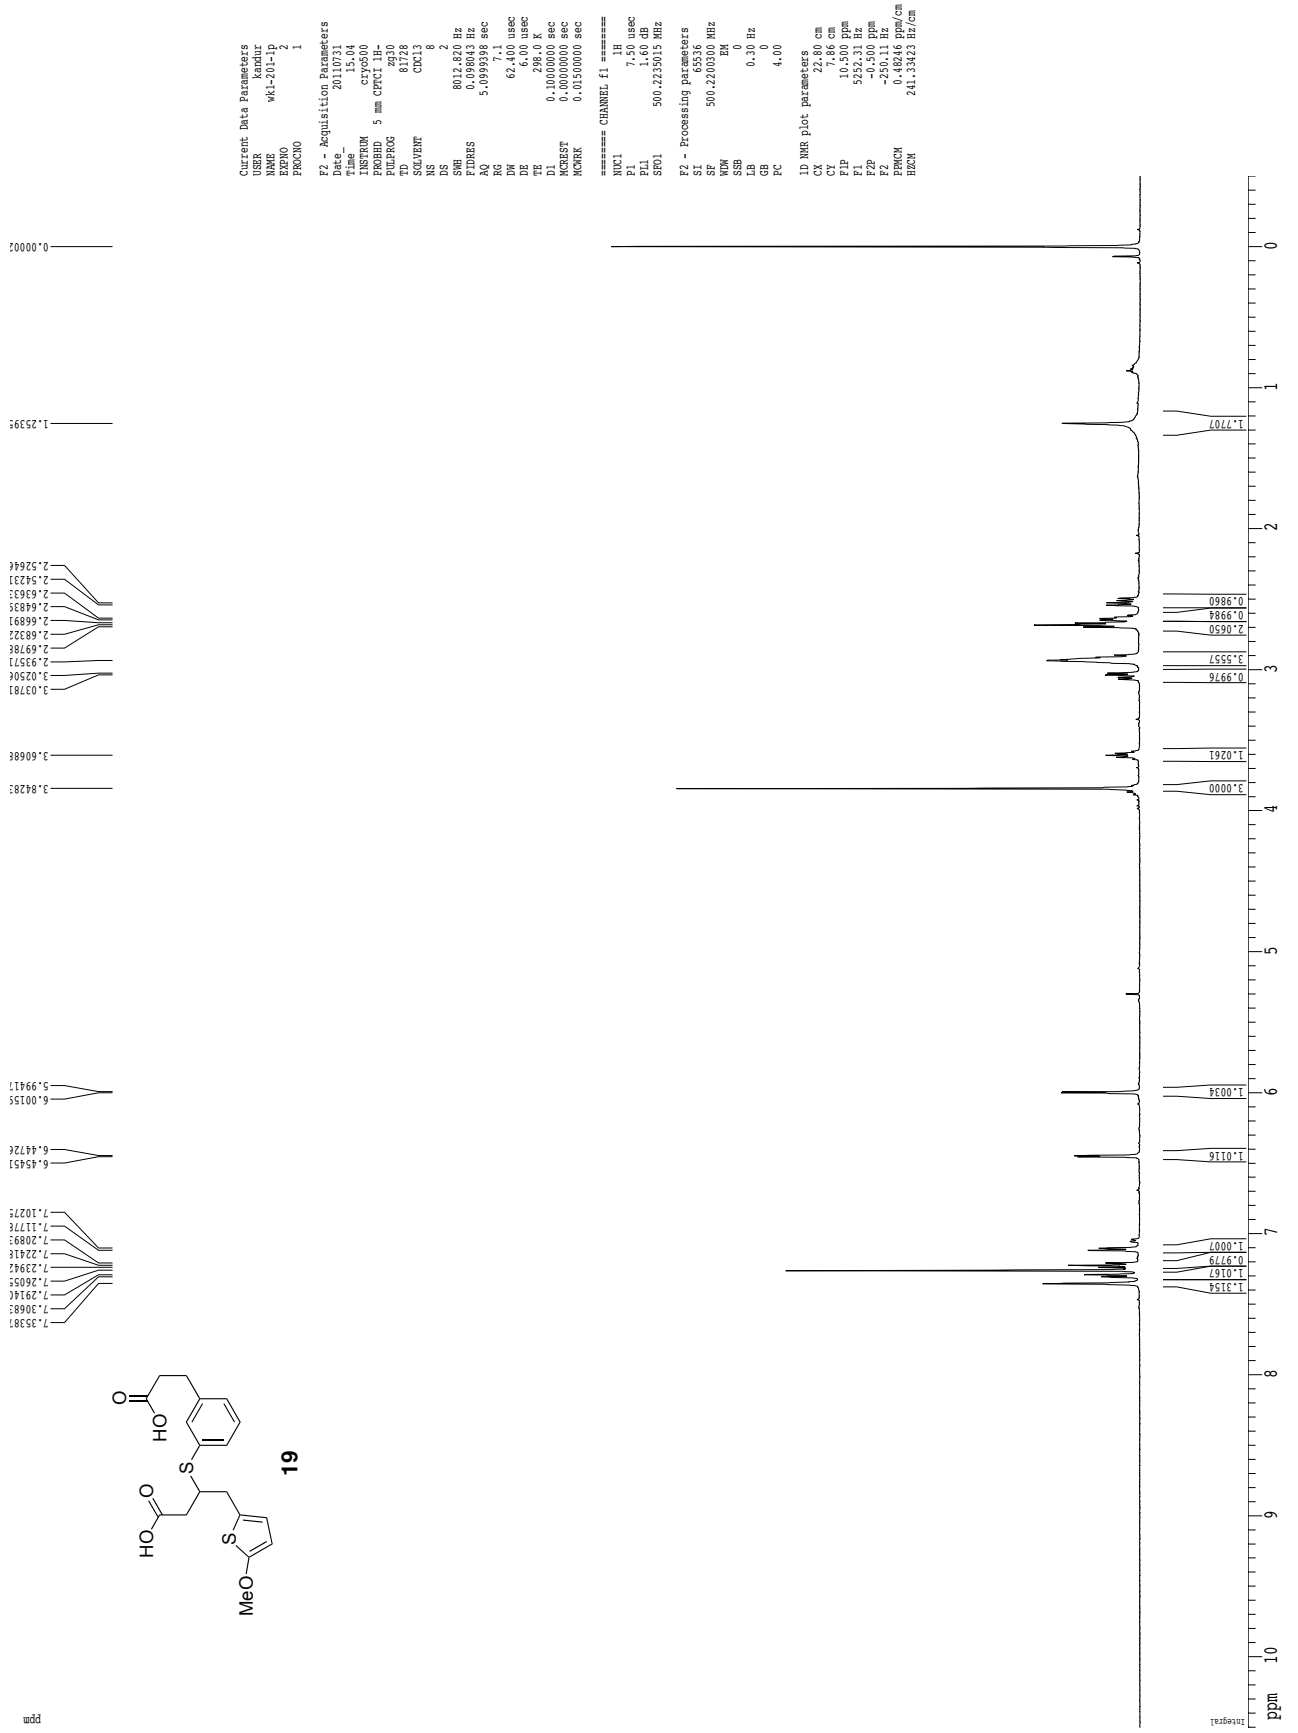

Z-restored spin-echo 13C spectrum with 1H decoupling

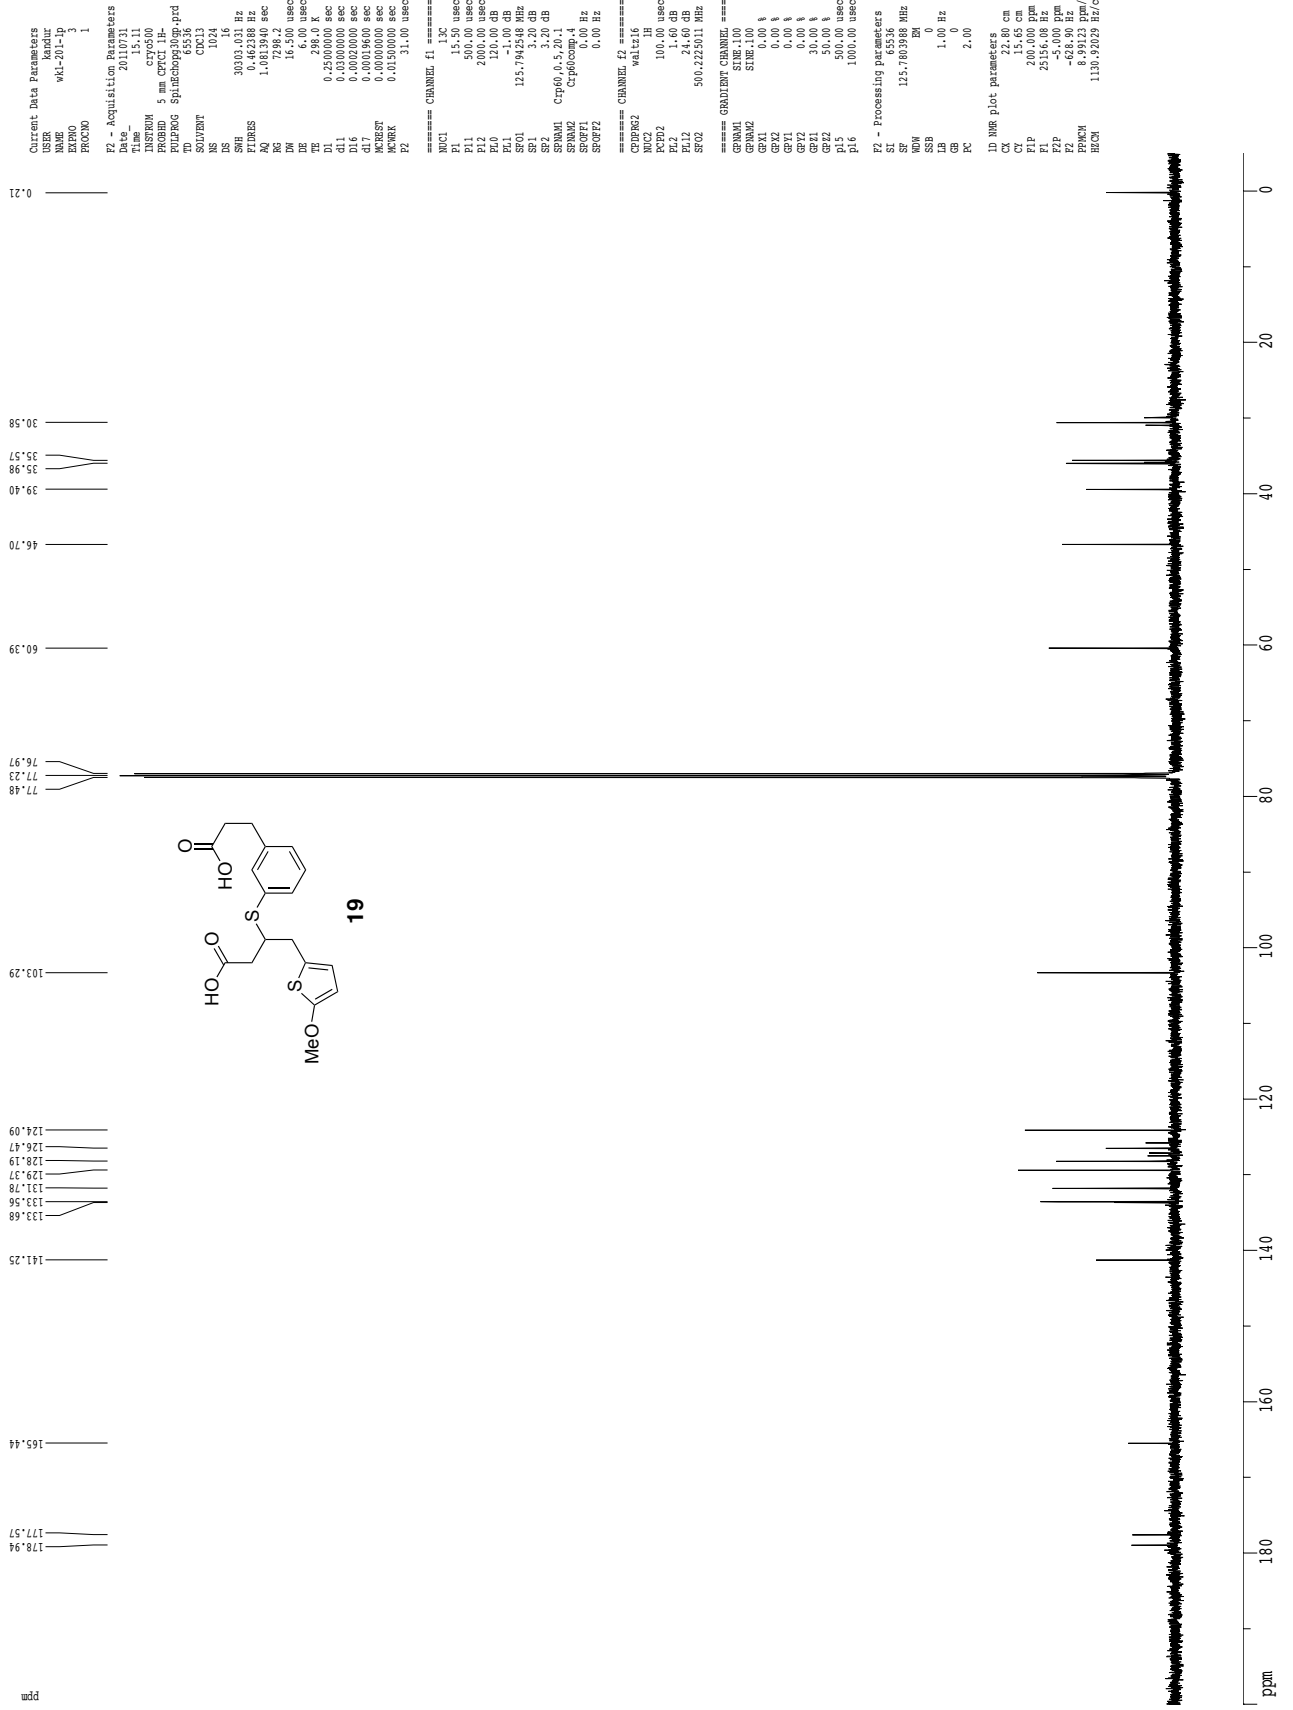



<sup>1</sup>H spectrum

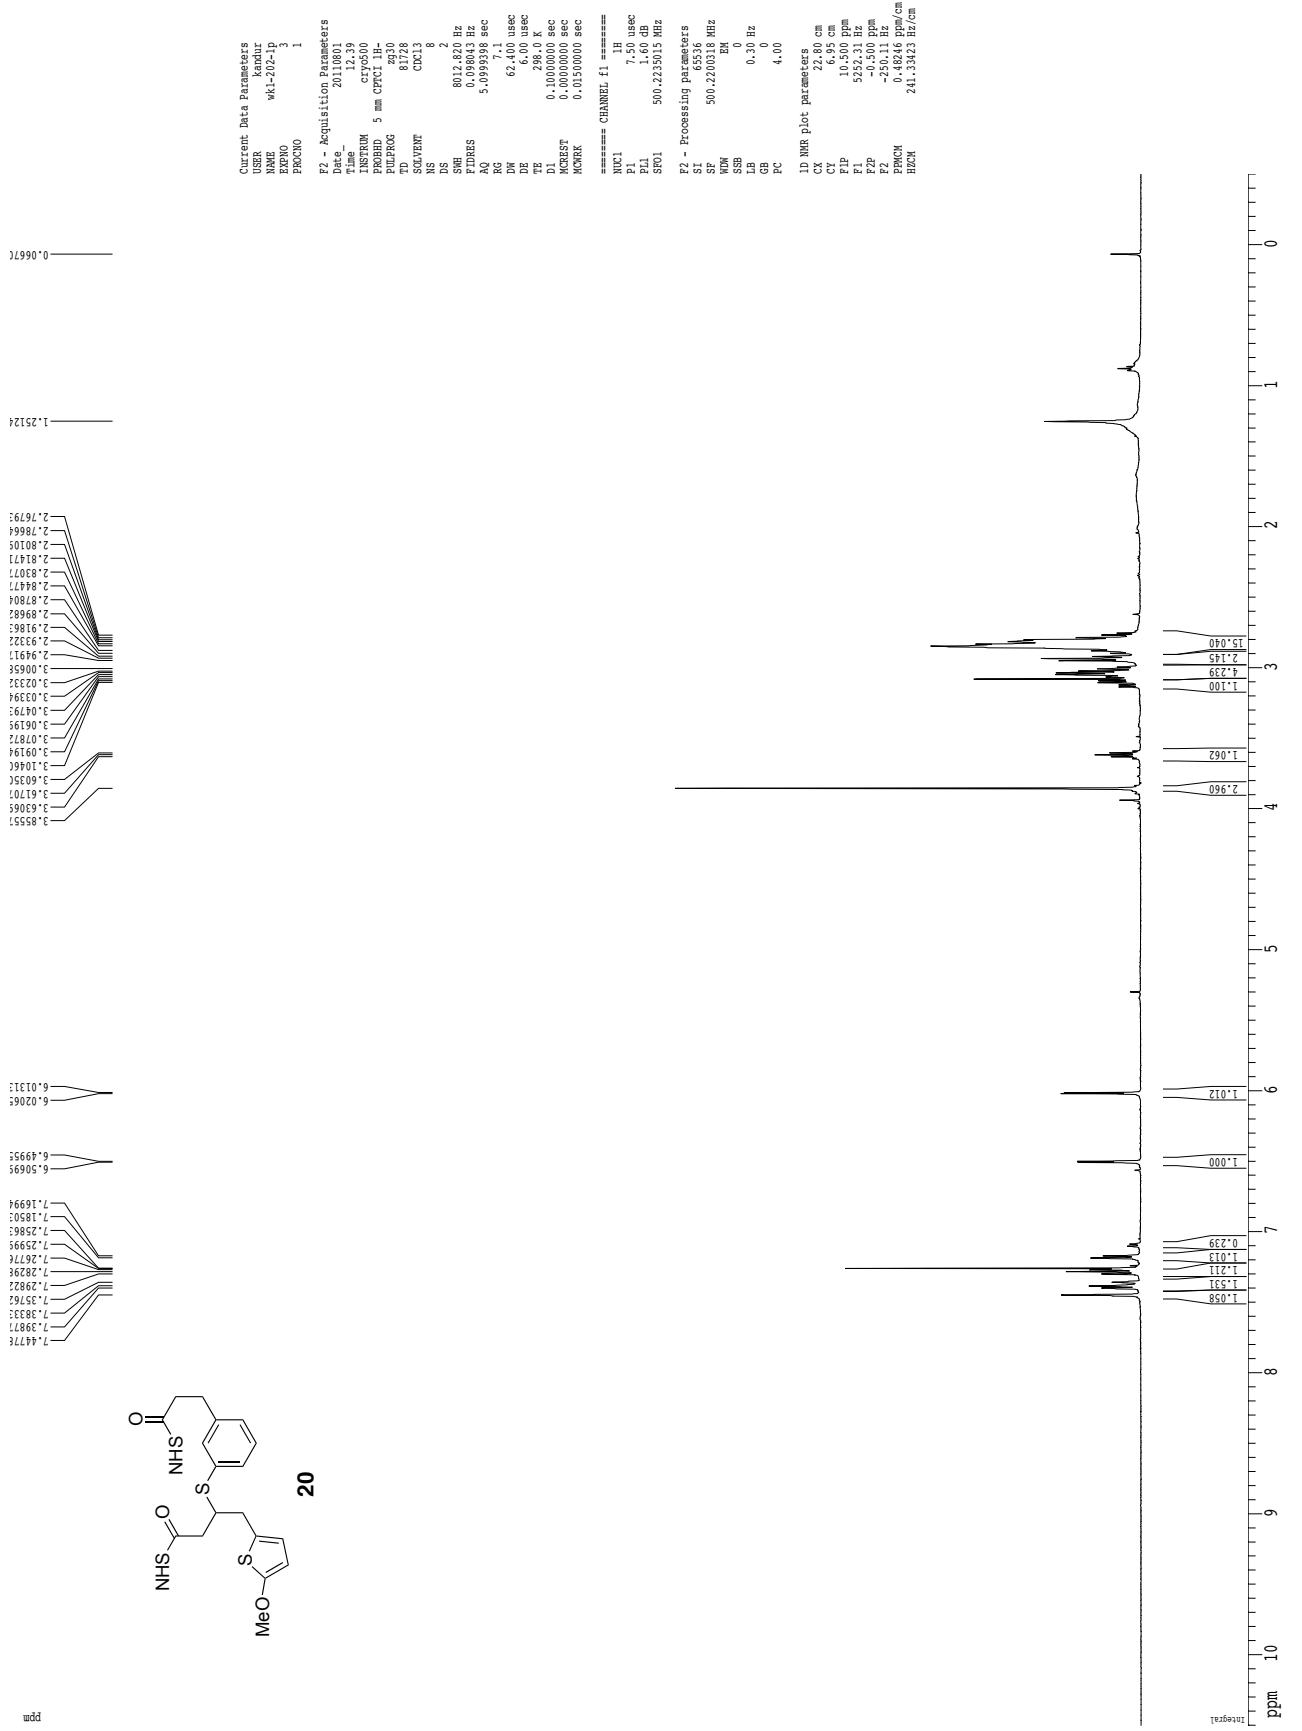

Z-restored spin-echo 13C spectrum with 1H decoupling

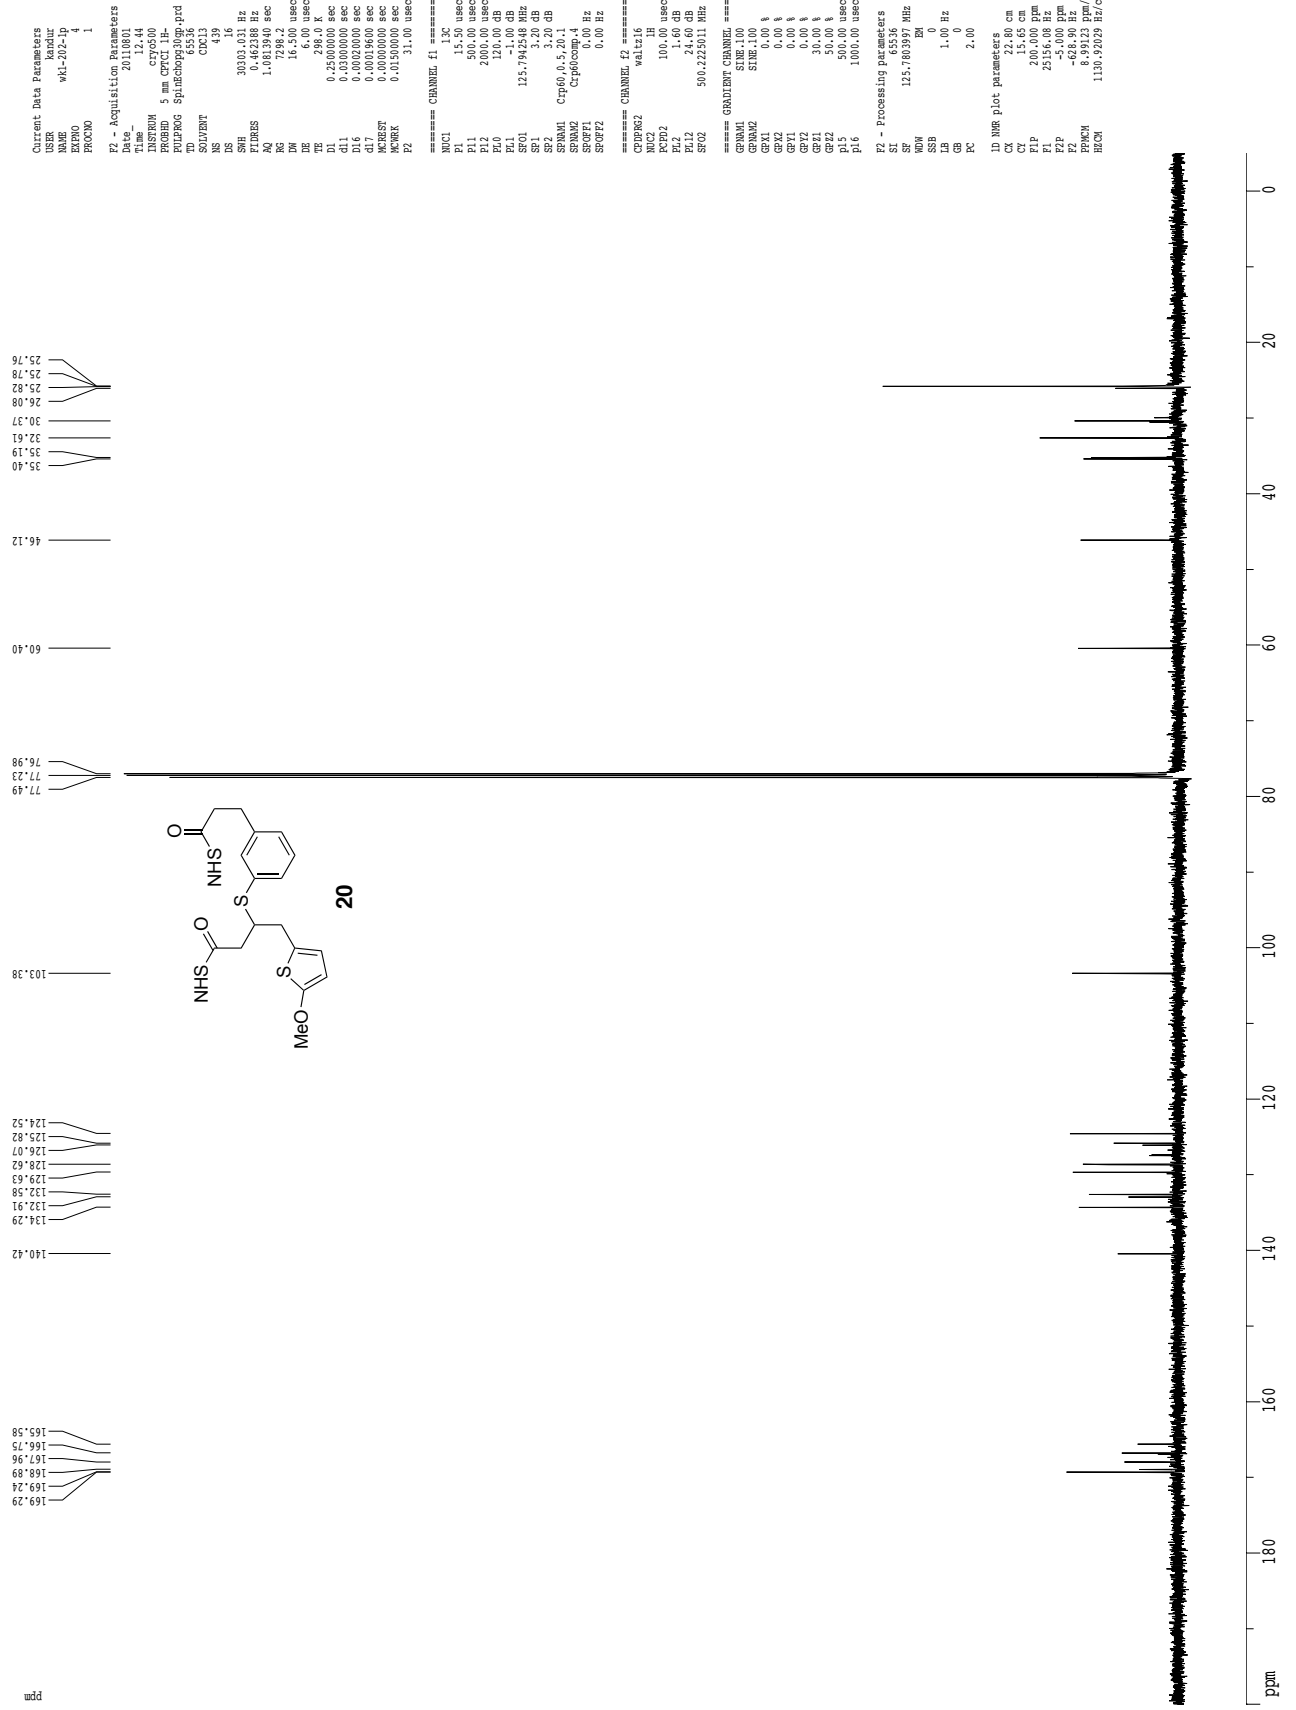

<sup>1</sup>H spectrum

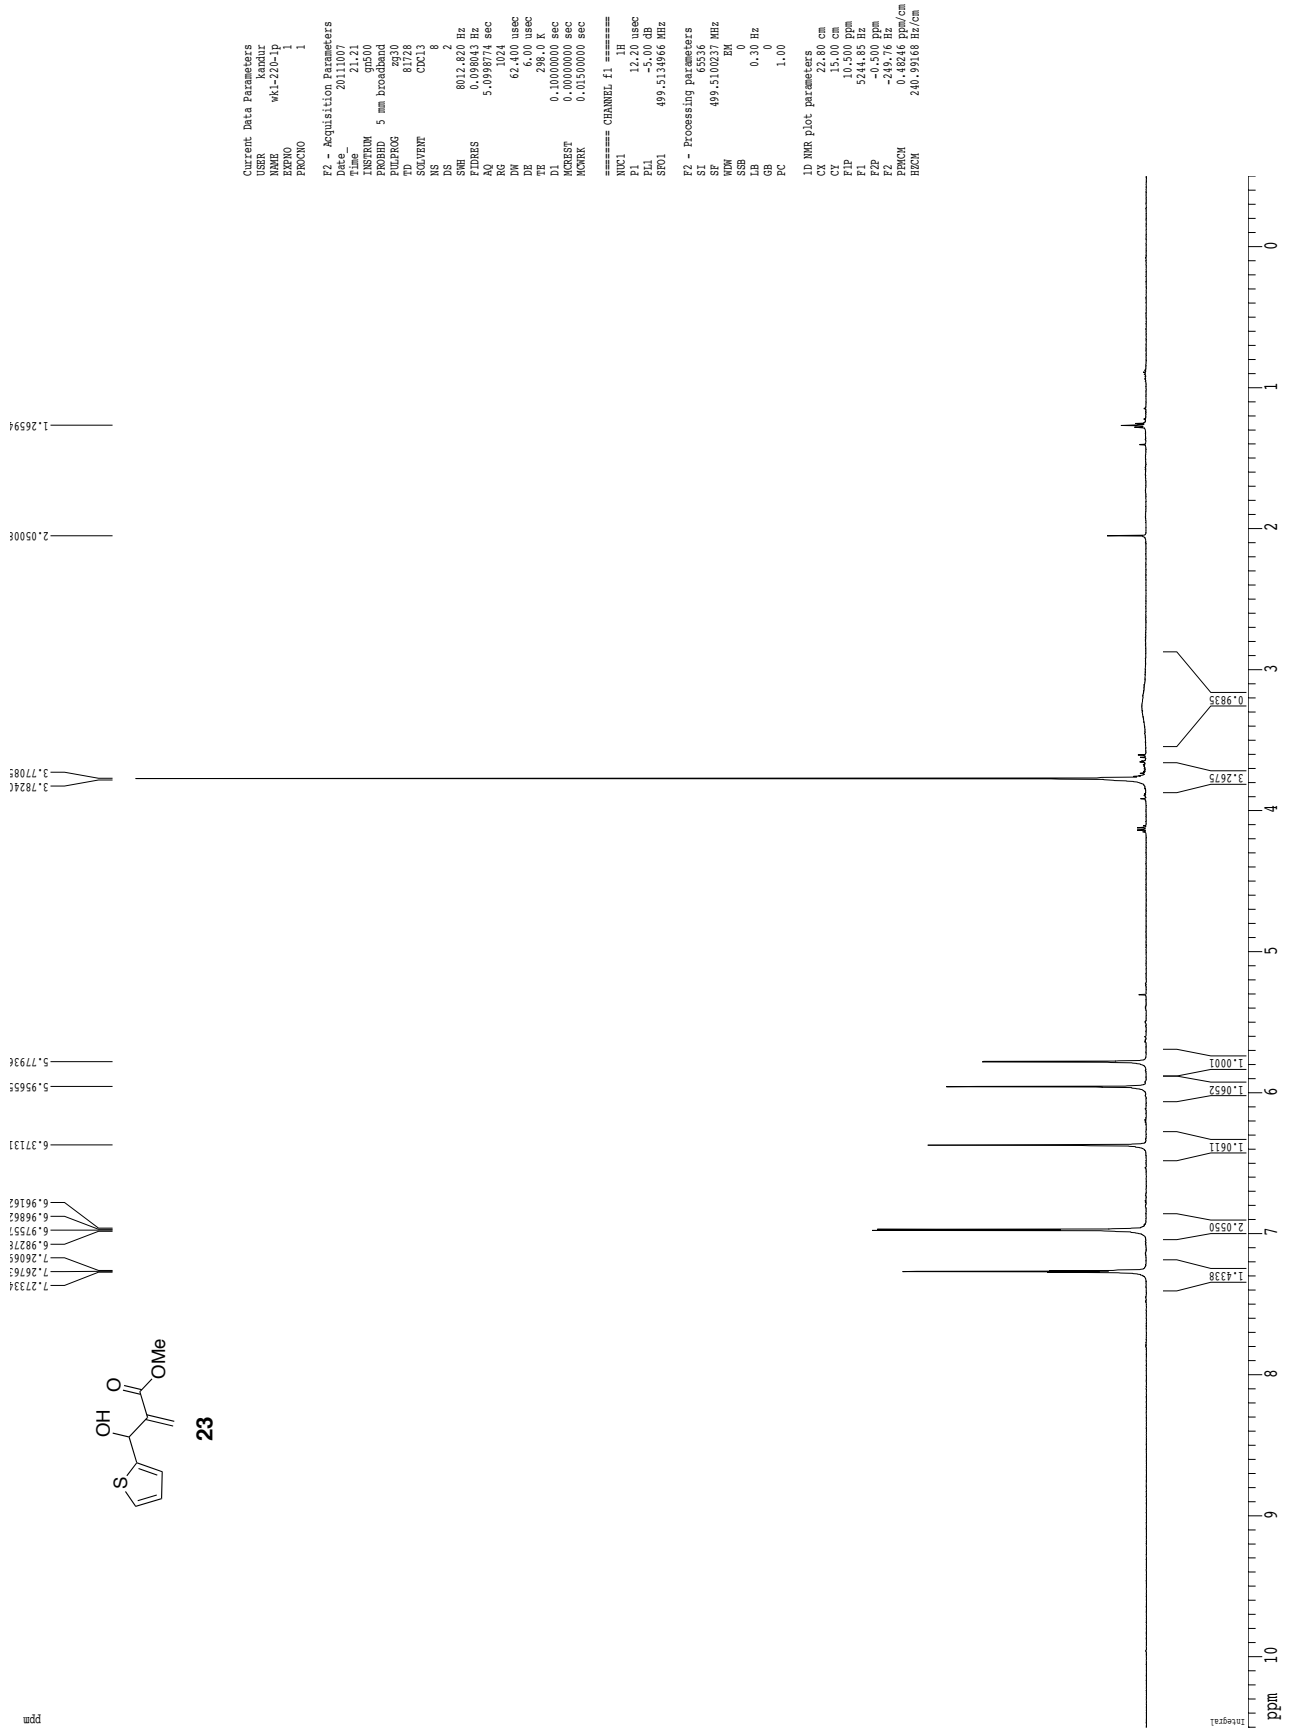

23

<sup>1</sup>H spectrum

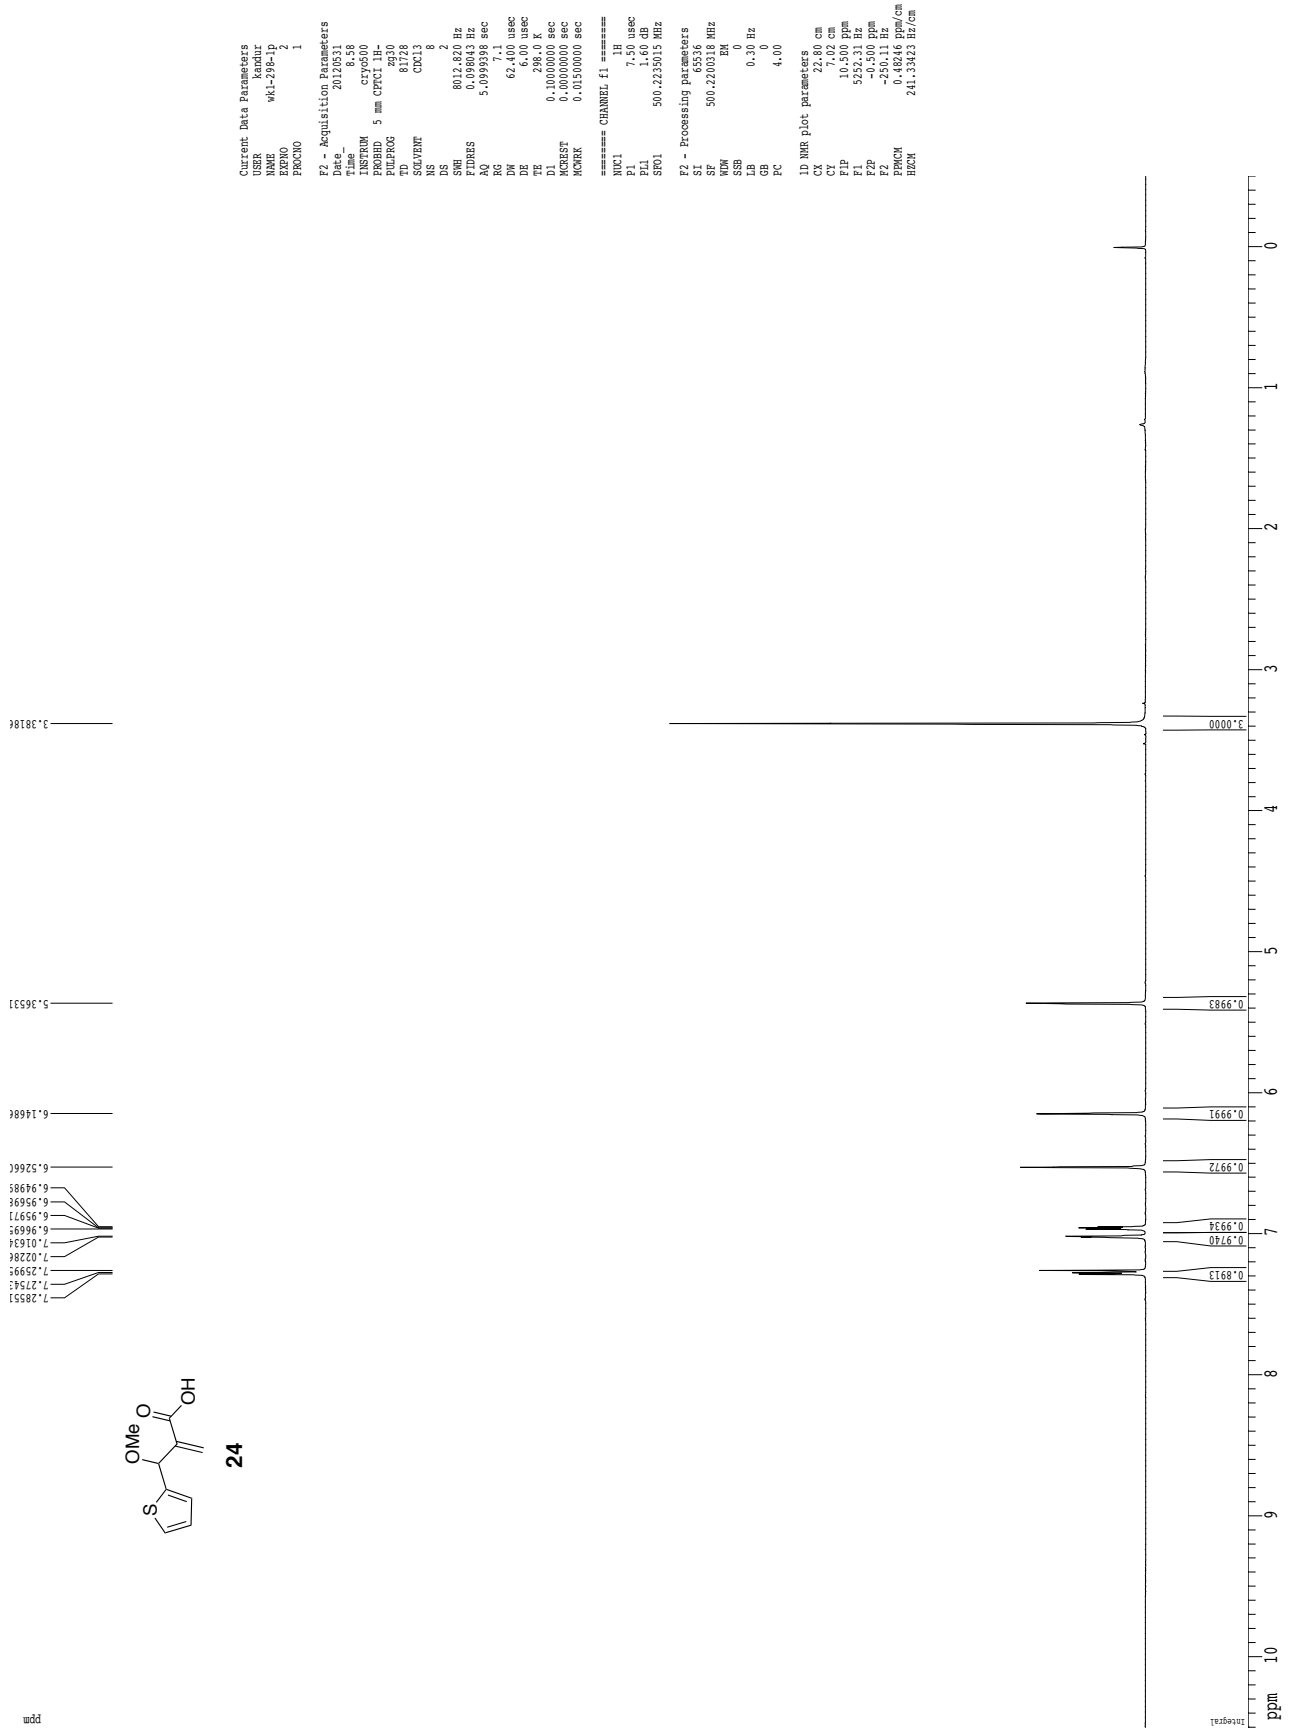

Z-restored spin-echo 13C spectrum with 1H decoupling

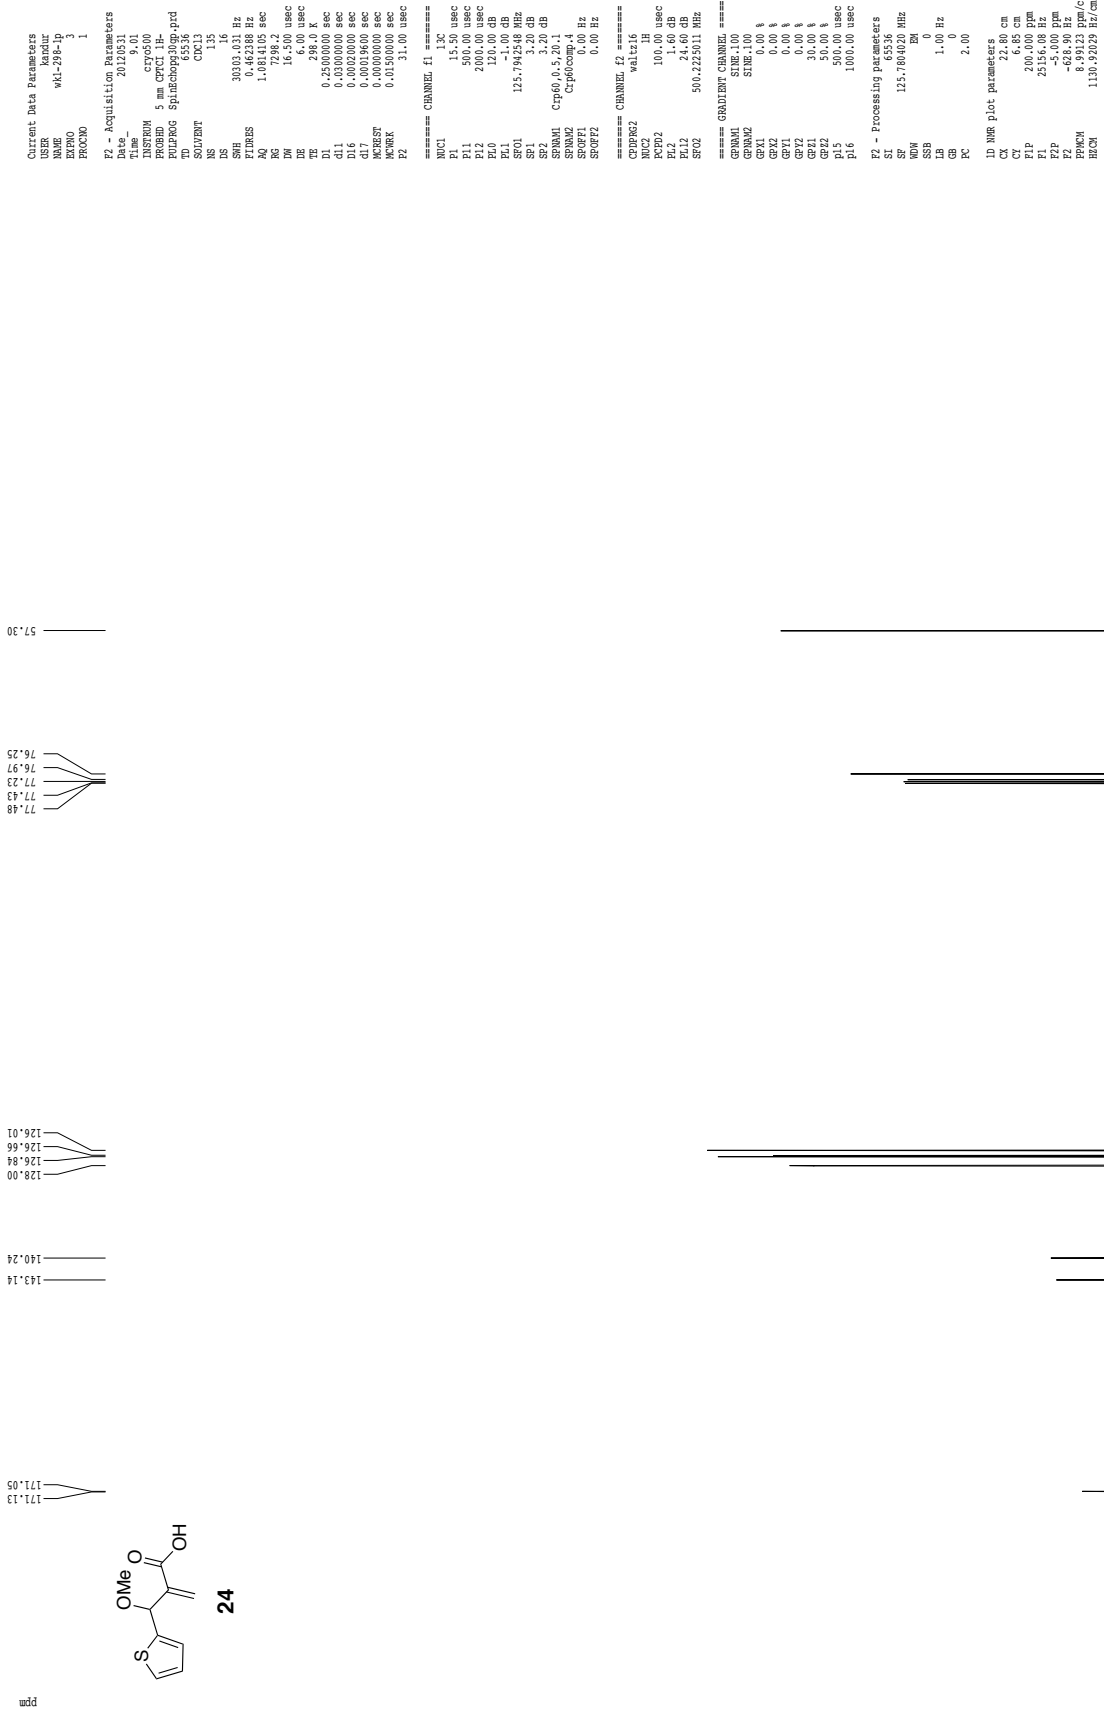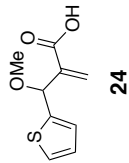

<sup>1</sup>H spectrum

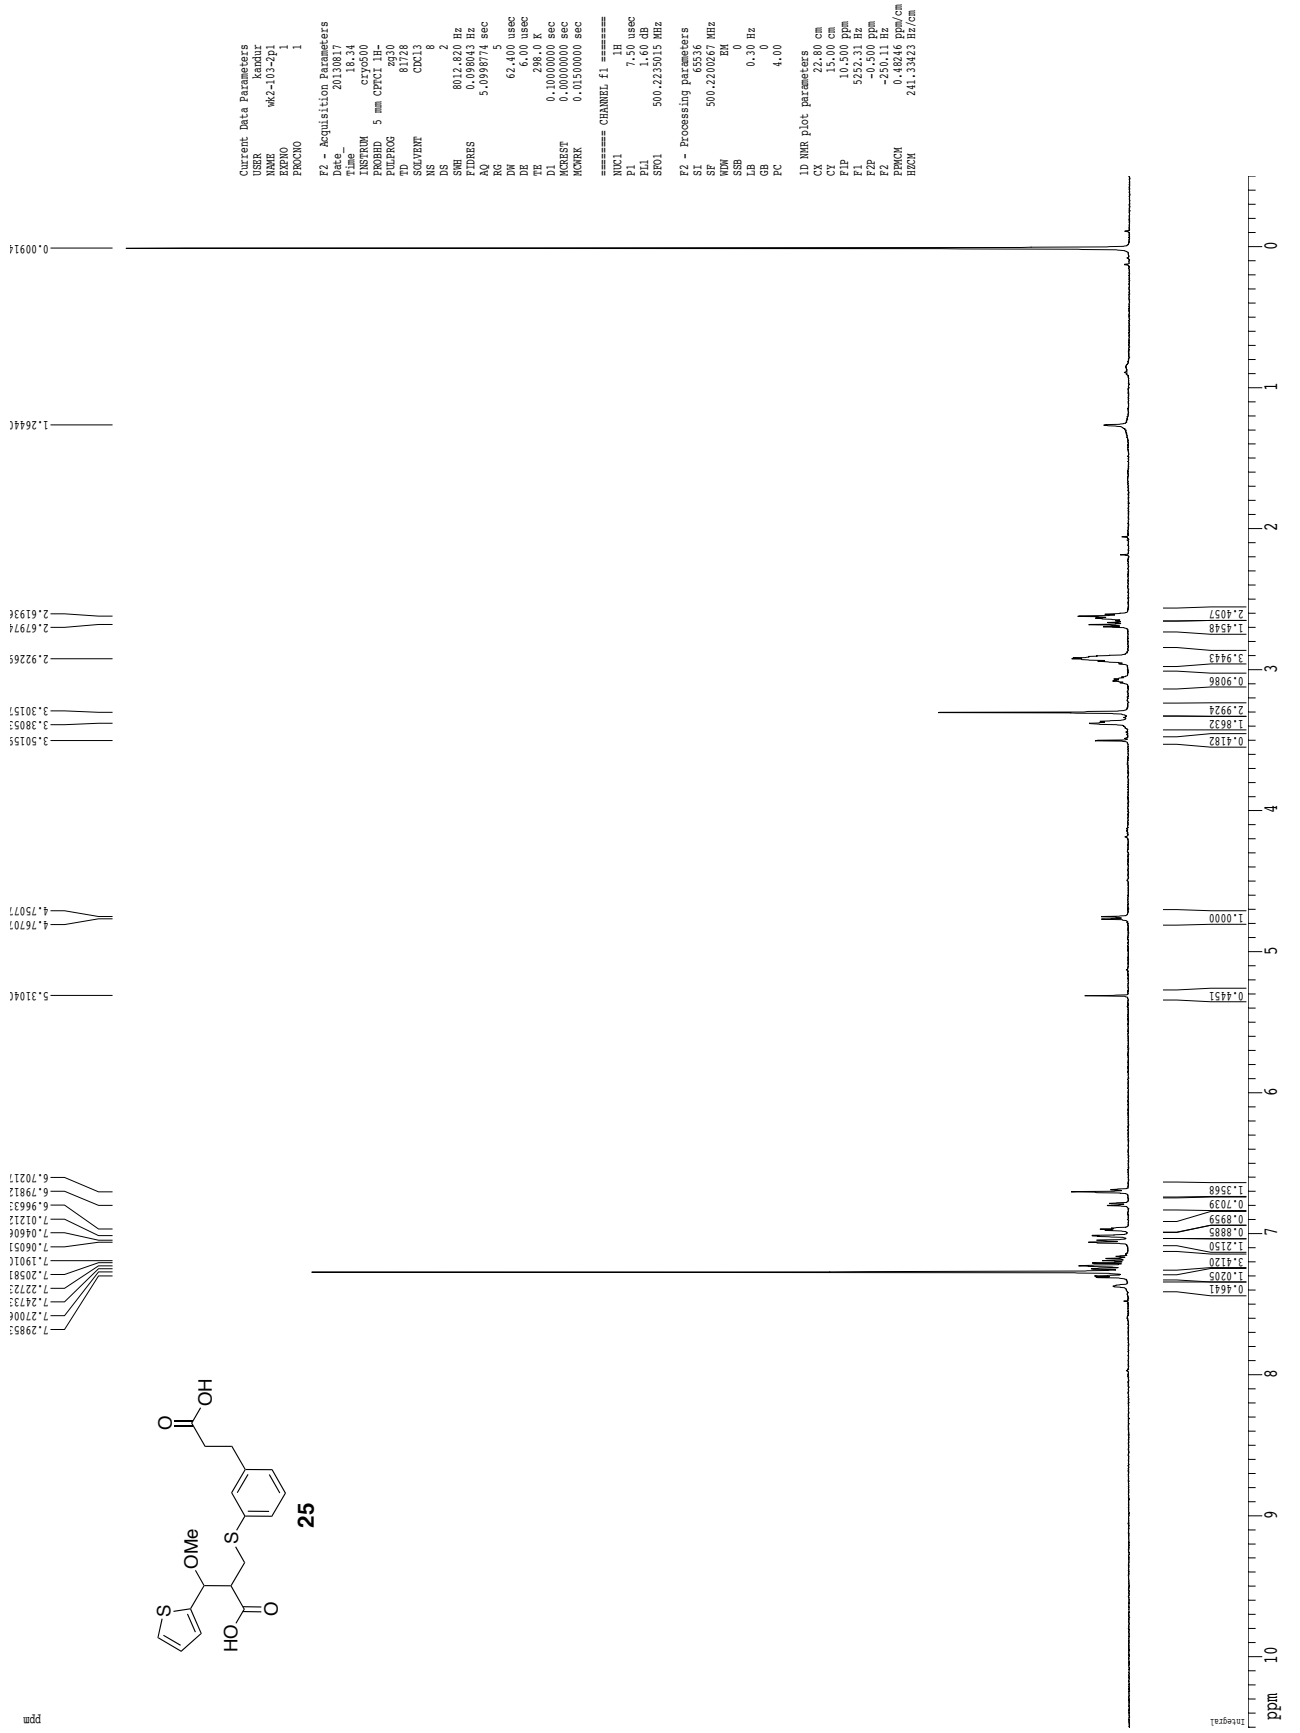

Z-restored spin-echo 13C spectrum with 1H decoupling

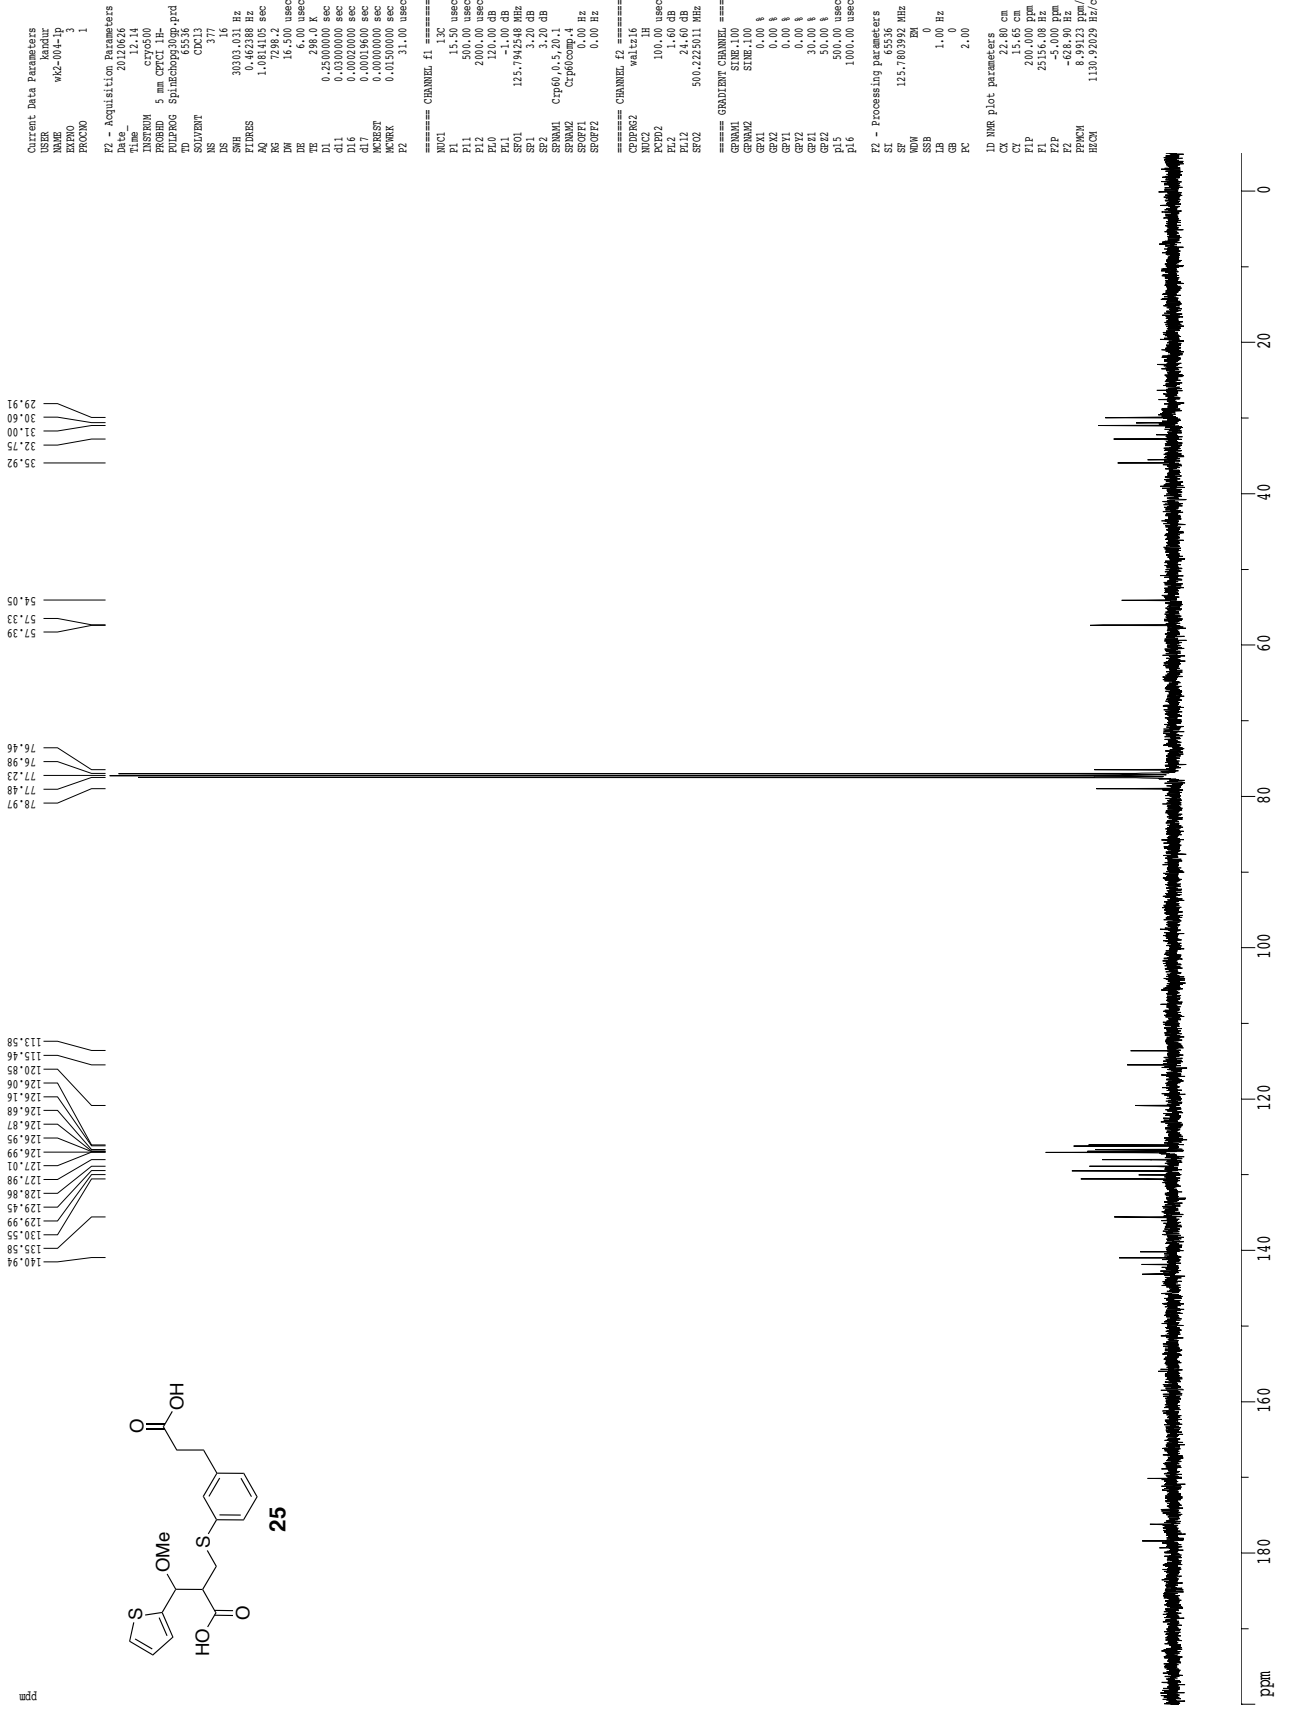

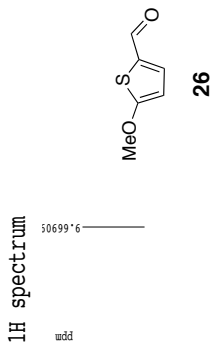

Current Data Parameters  
 USER Kandur  
 NAME wk1-25E-1c  
 PROCNO 1  
 F2 - Acquisition Parameters  
 Date\_ 20120226  
 Time 10:43  
 PROBNM 1000000000  
 PROCNO 5 nm broadband  
 PULPROG zg30  
 TD 81728  
 SOLVENT CDCl3  
 NS 8  
 DS 2  
 SWH 8012.820 Hz  
 FIDRES 0.098043 Hz  
 AQ 5.0998774 sec  
 RG 784.1  
 DM 62.400 usec  
 DE 6.00 usec  
 TE 298.2 K  
 D1 0.10000000 sec  
 MCKEY 0.00000000 sec  
 MCKEY 0.01500000 sec  
 ===== CHANNEL f1 =====  
 NUC1 1H  
 P1 12.20 usec  
 PL1 0.00 dB  
 PL2 -5.00 dB  
 SFO1 499.5134966 MHz  
 F2 - Processing parameters  
 SI 32768  
 SF 65536  
 EQ 1  
 WDW EM  
 SSB 0  
 LB 0.30 Hz  
 GB 0  
 PC 1.00  
 ID NMR plot parameters  
 CX 22.80 cm  
 CY 6.98 cm  
 F1 524.488 Hz  
 F2 524.488 Hz  
 F3 -5.000 ppm  
 F4 -245.76 Hz  
 F5 0.48246 ppm/cm  
 F6 240.95168 Hz/cm

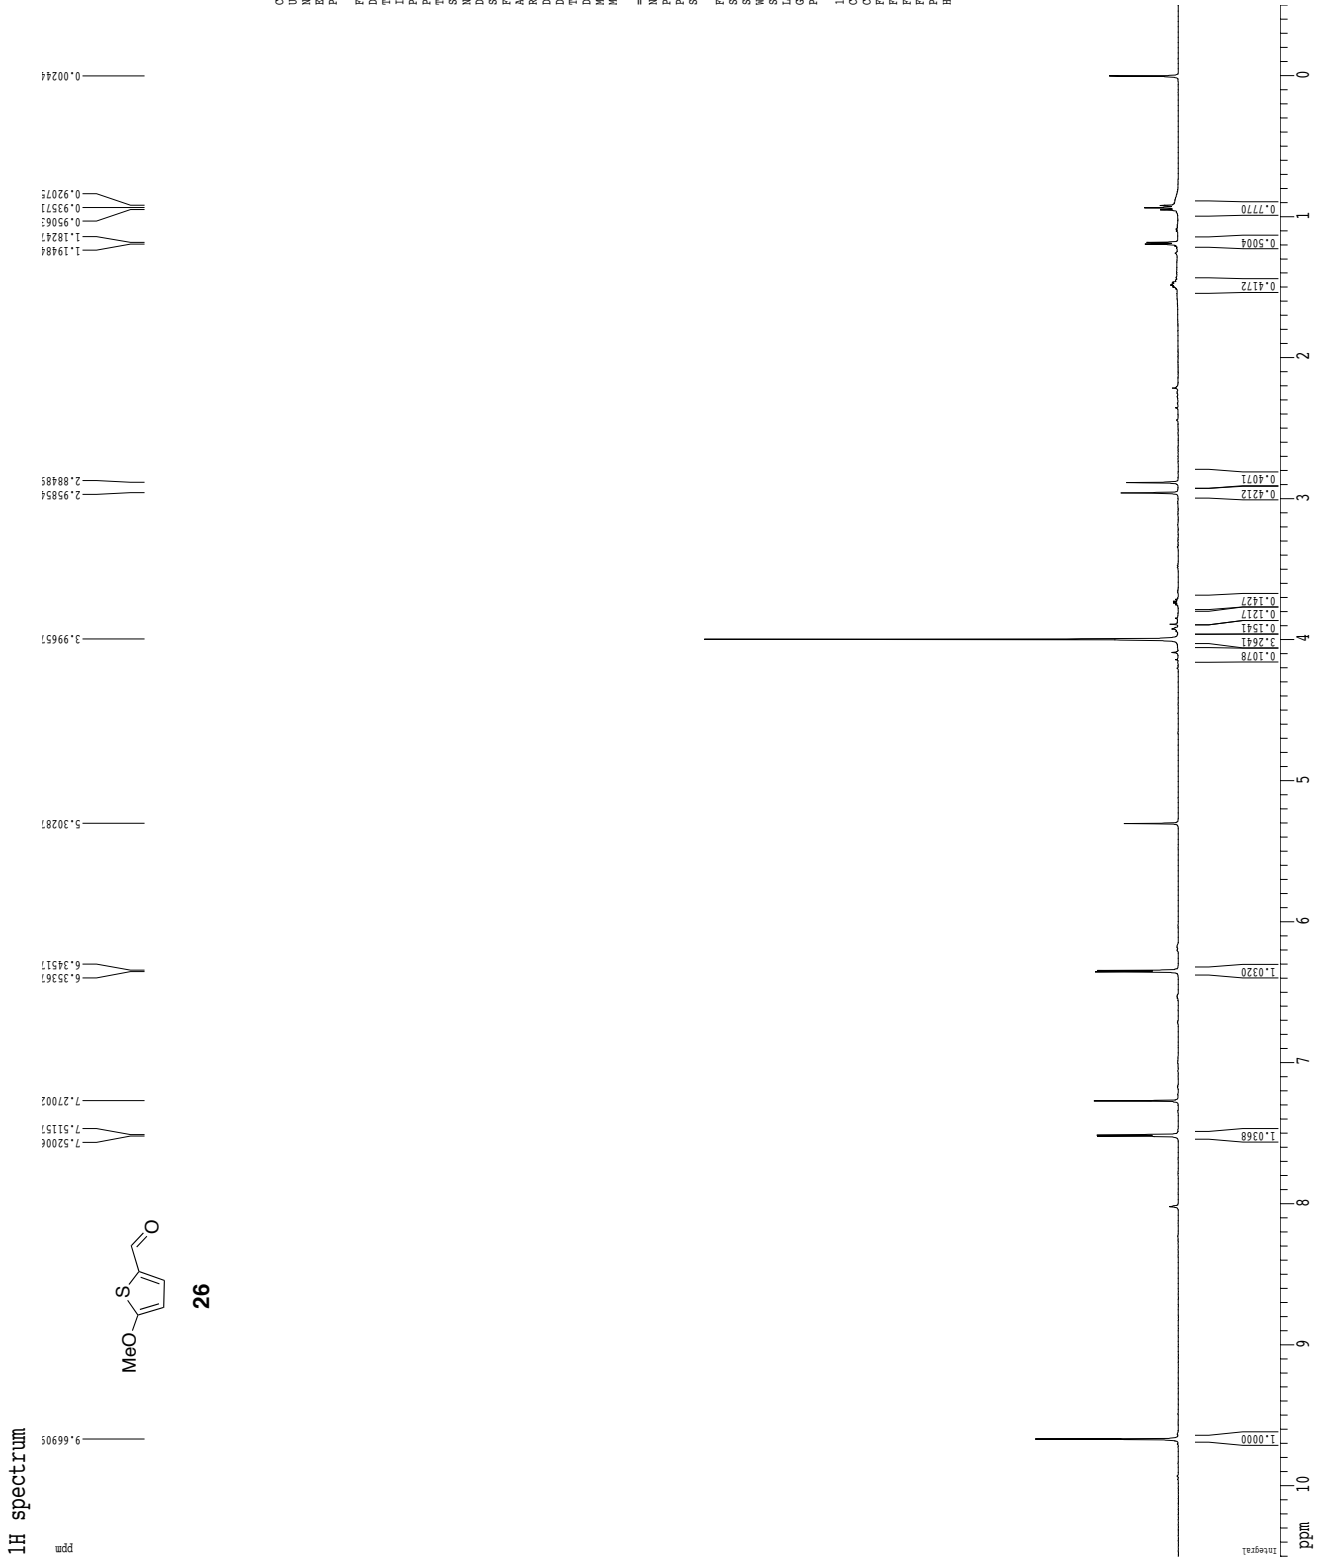



<sup>1</sup>H spectrum

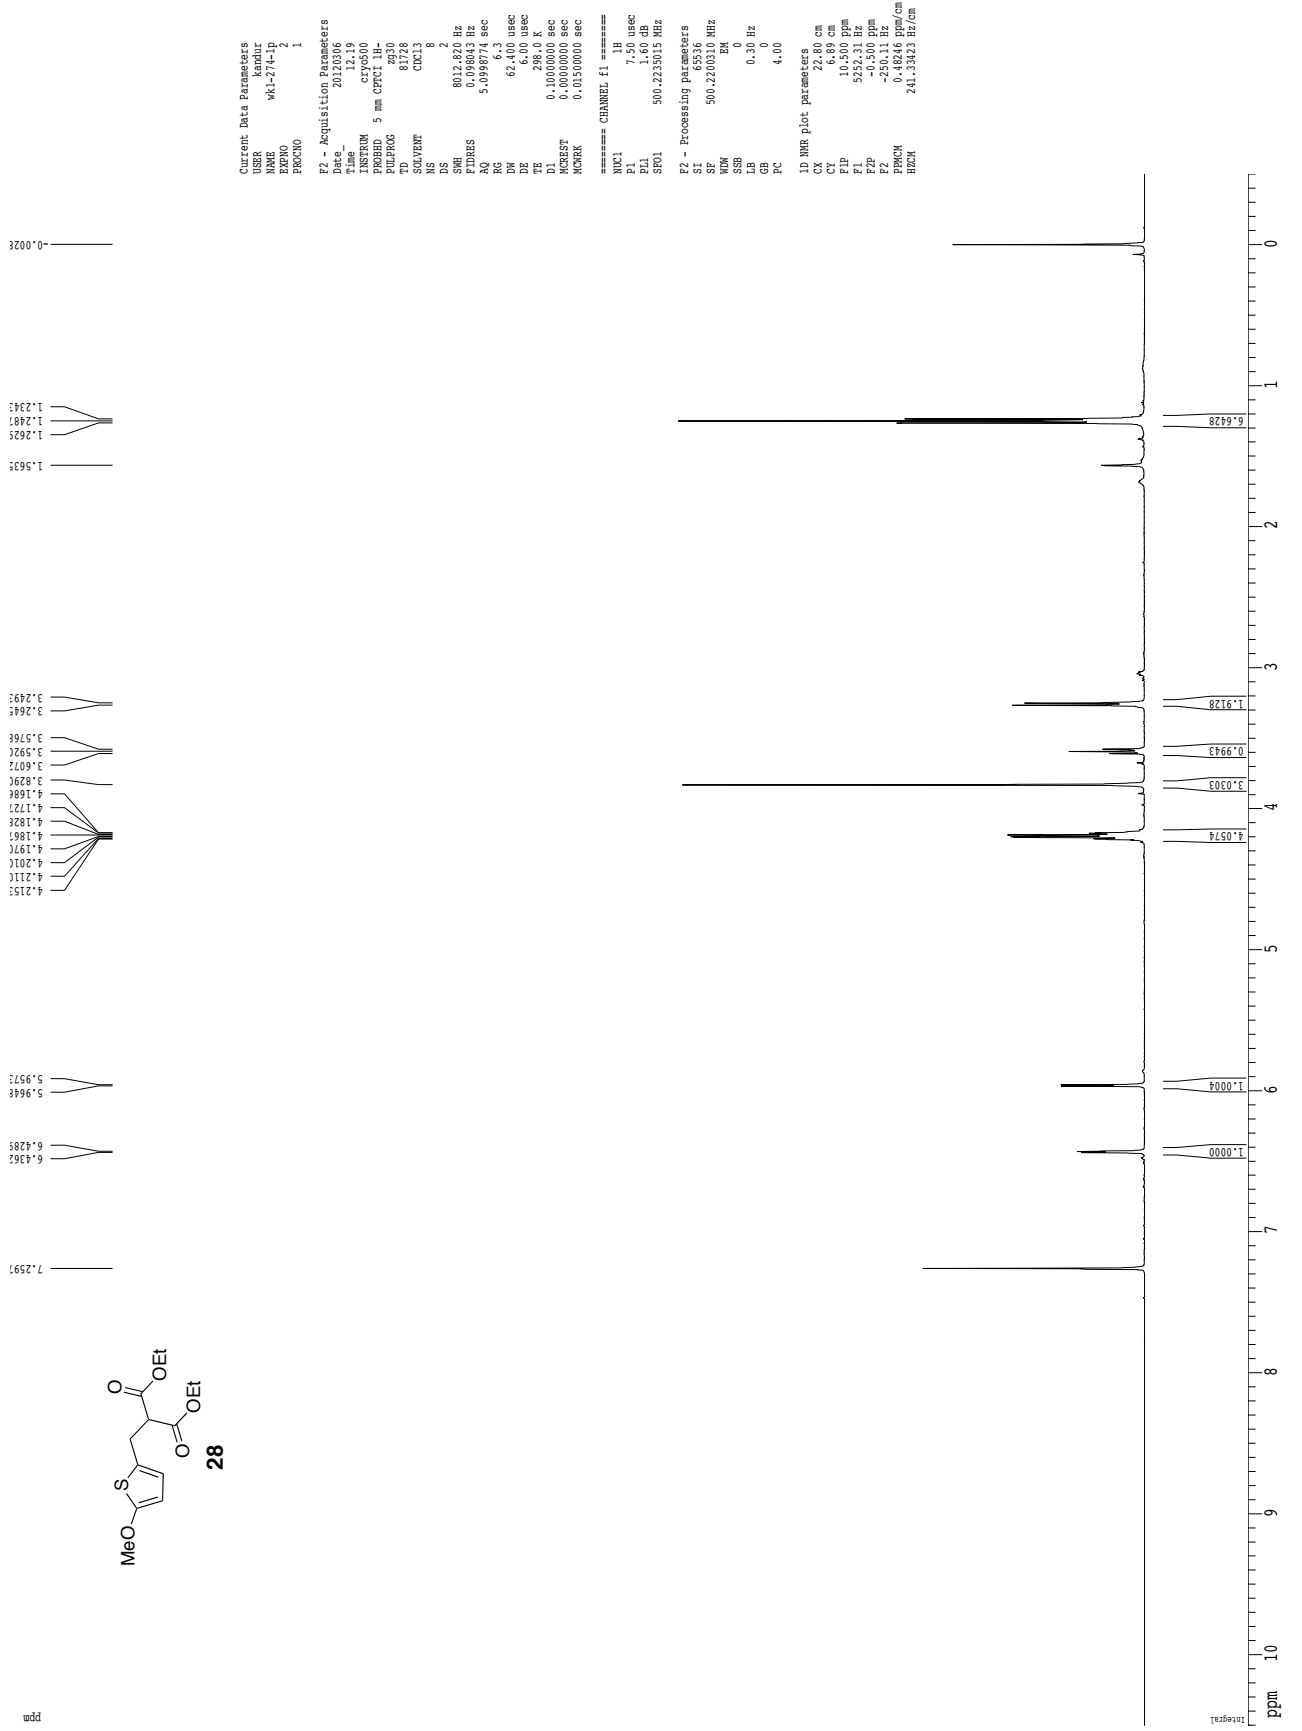

Z-restored spin-echo 13C spectrum with 1H decoupling

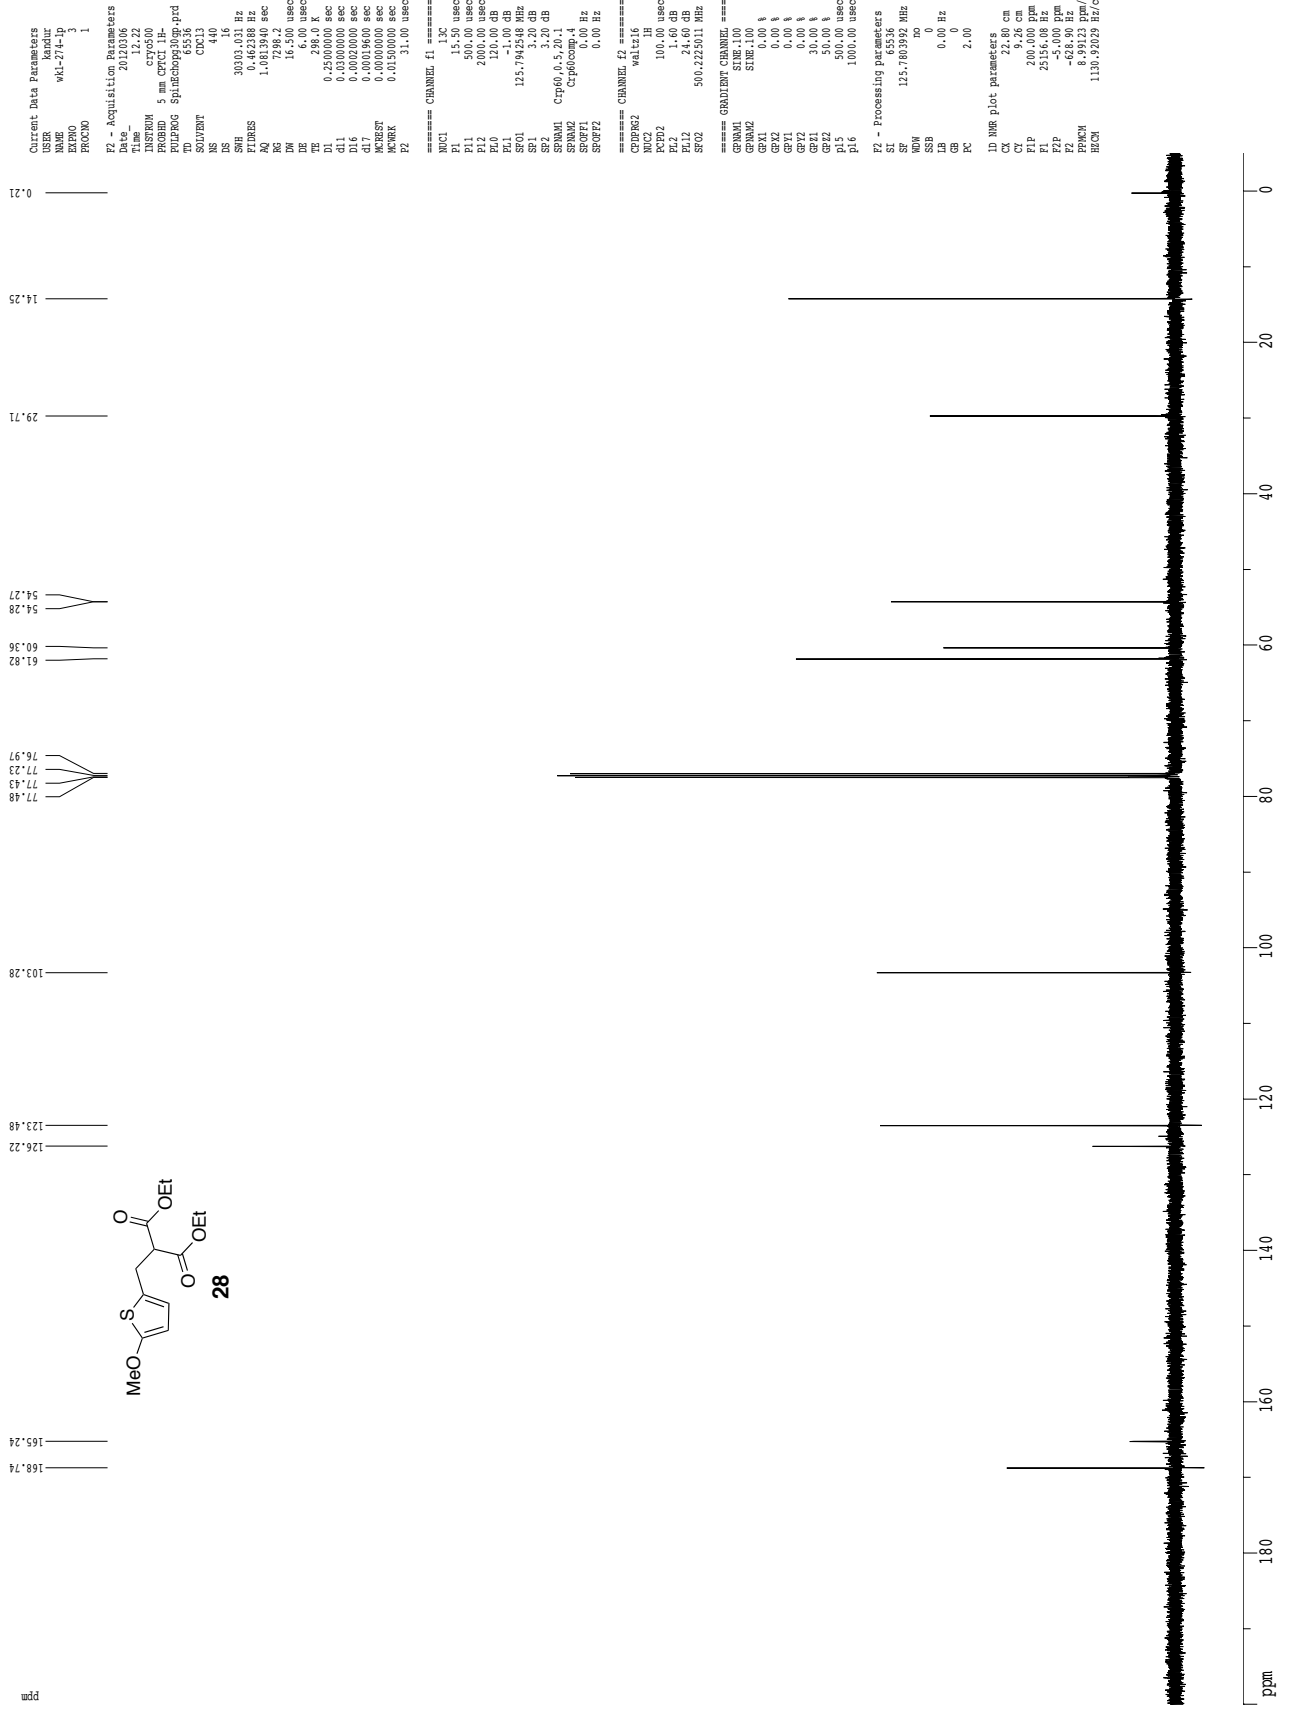

<sup>1</sup>H spectrum

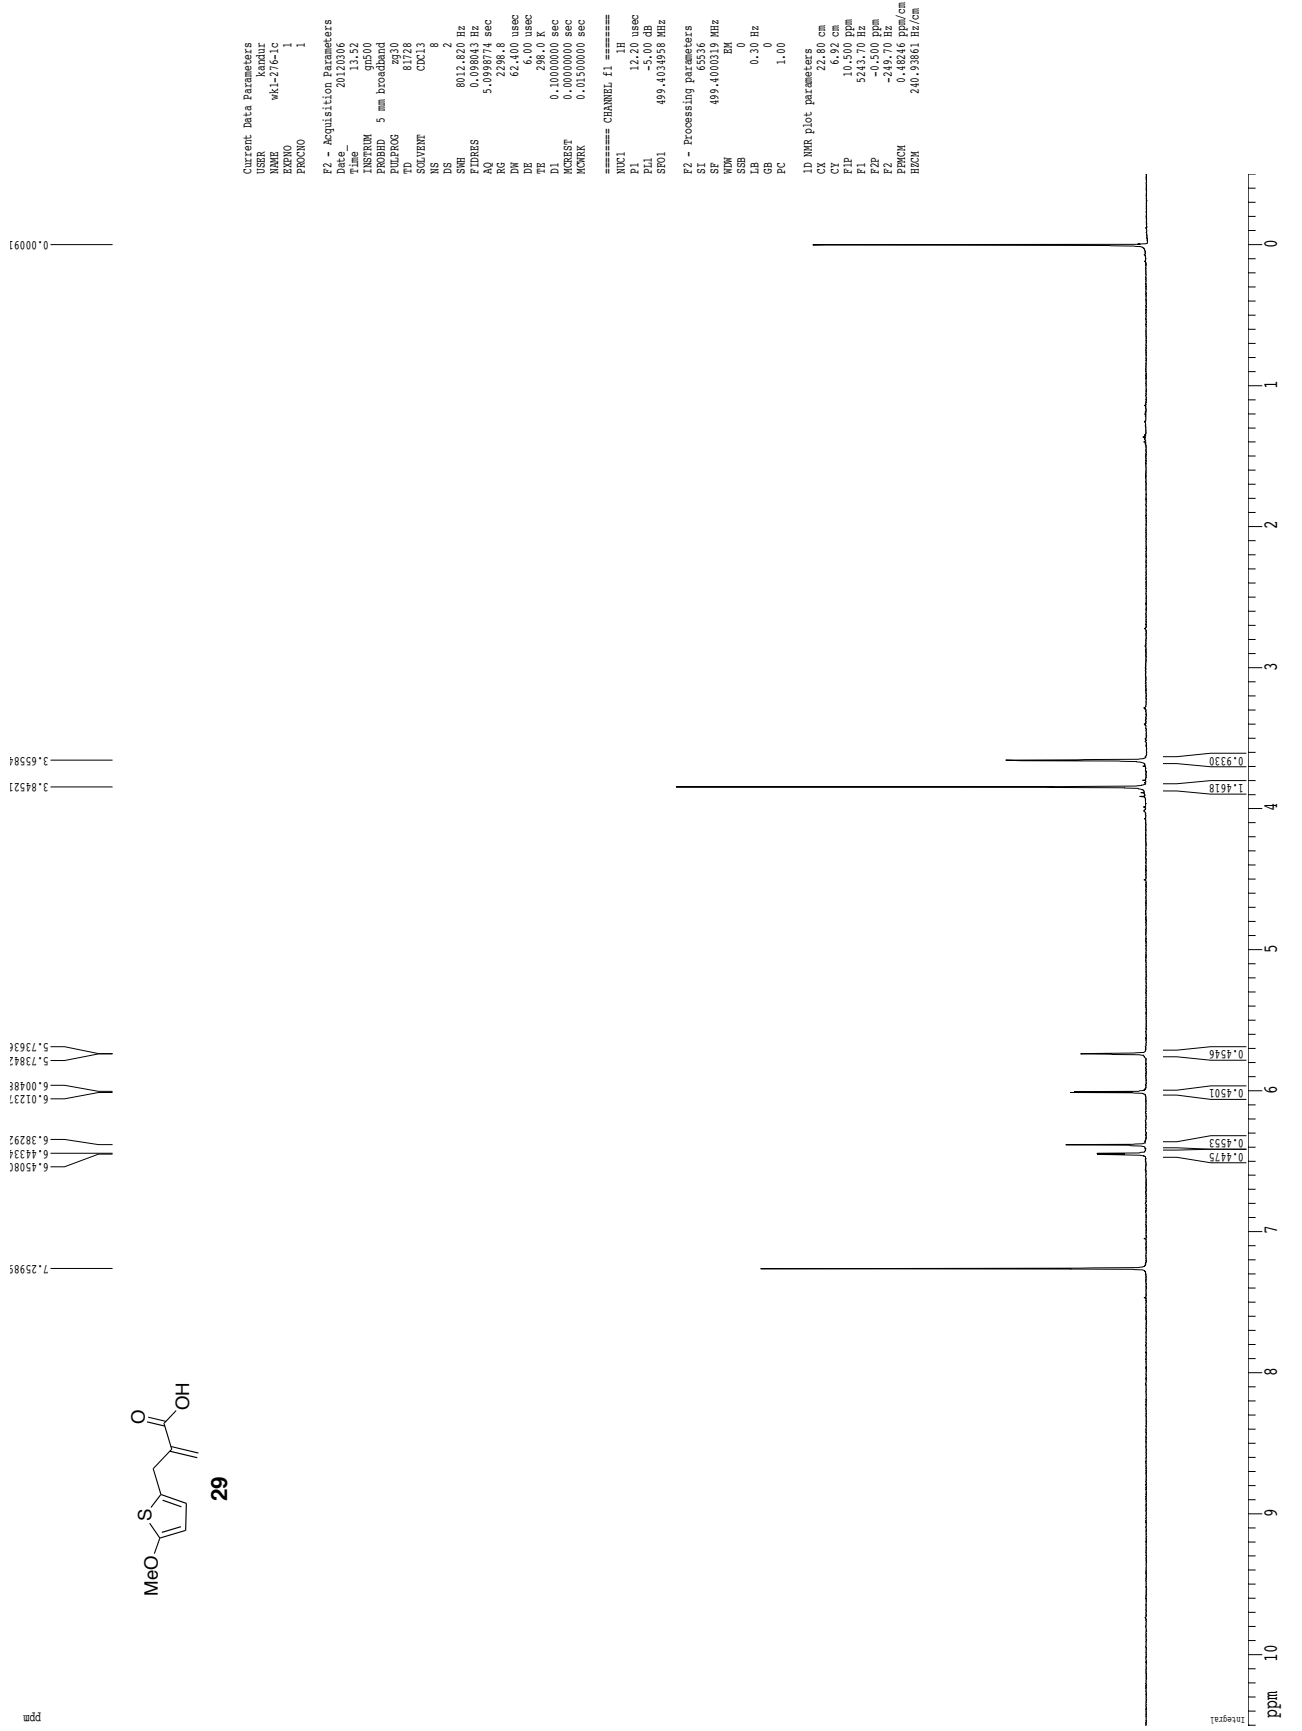

## 13C spectrum with 1H decoupling

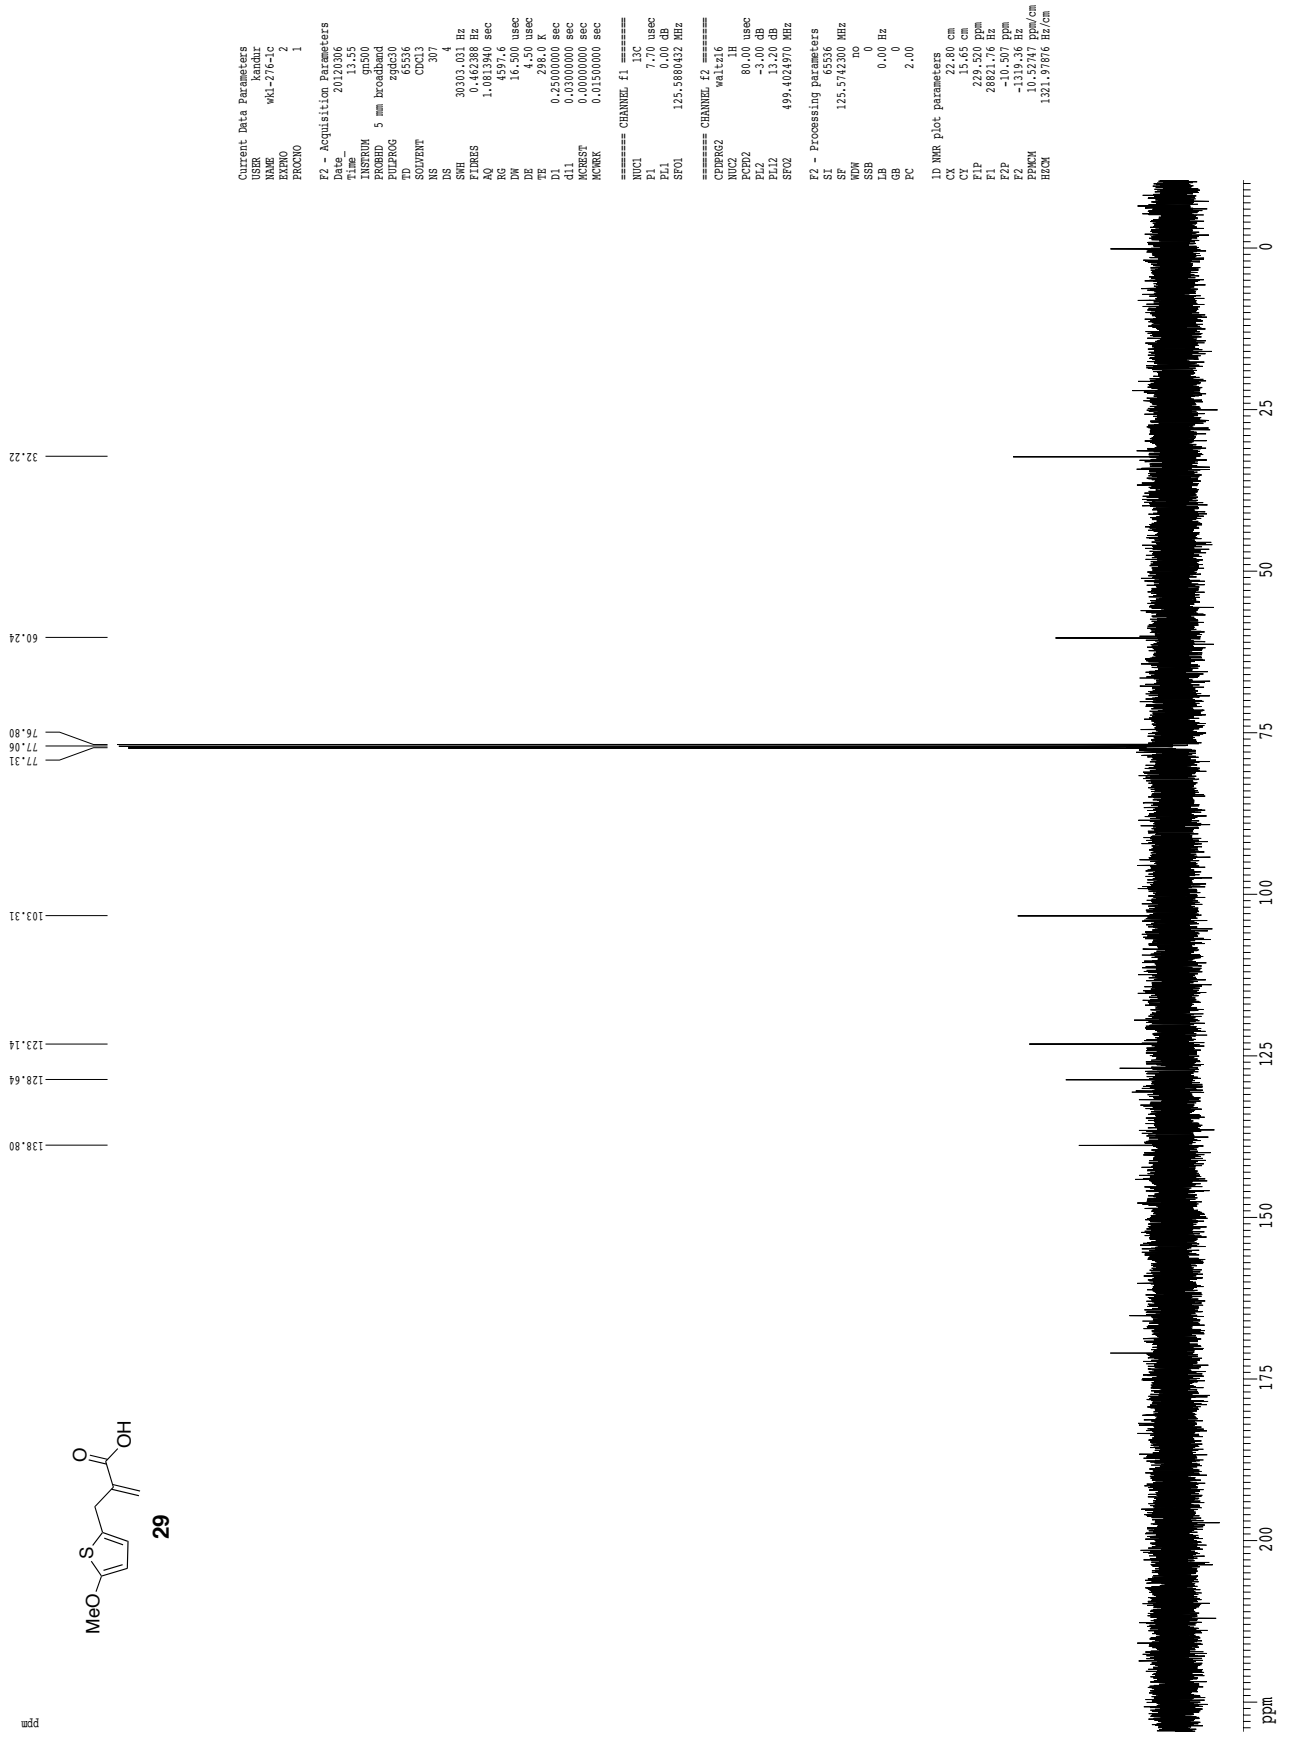





<sup>1</sup>H spectrum

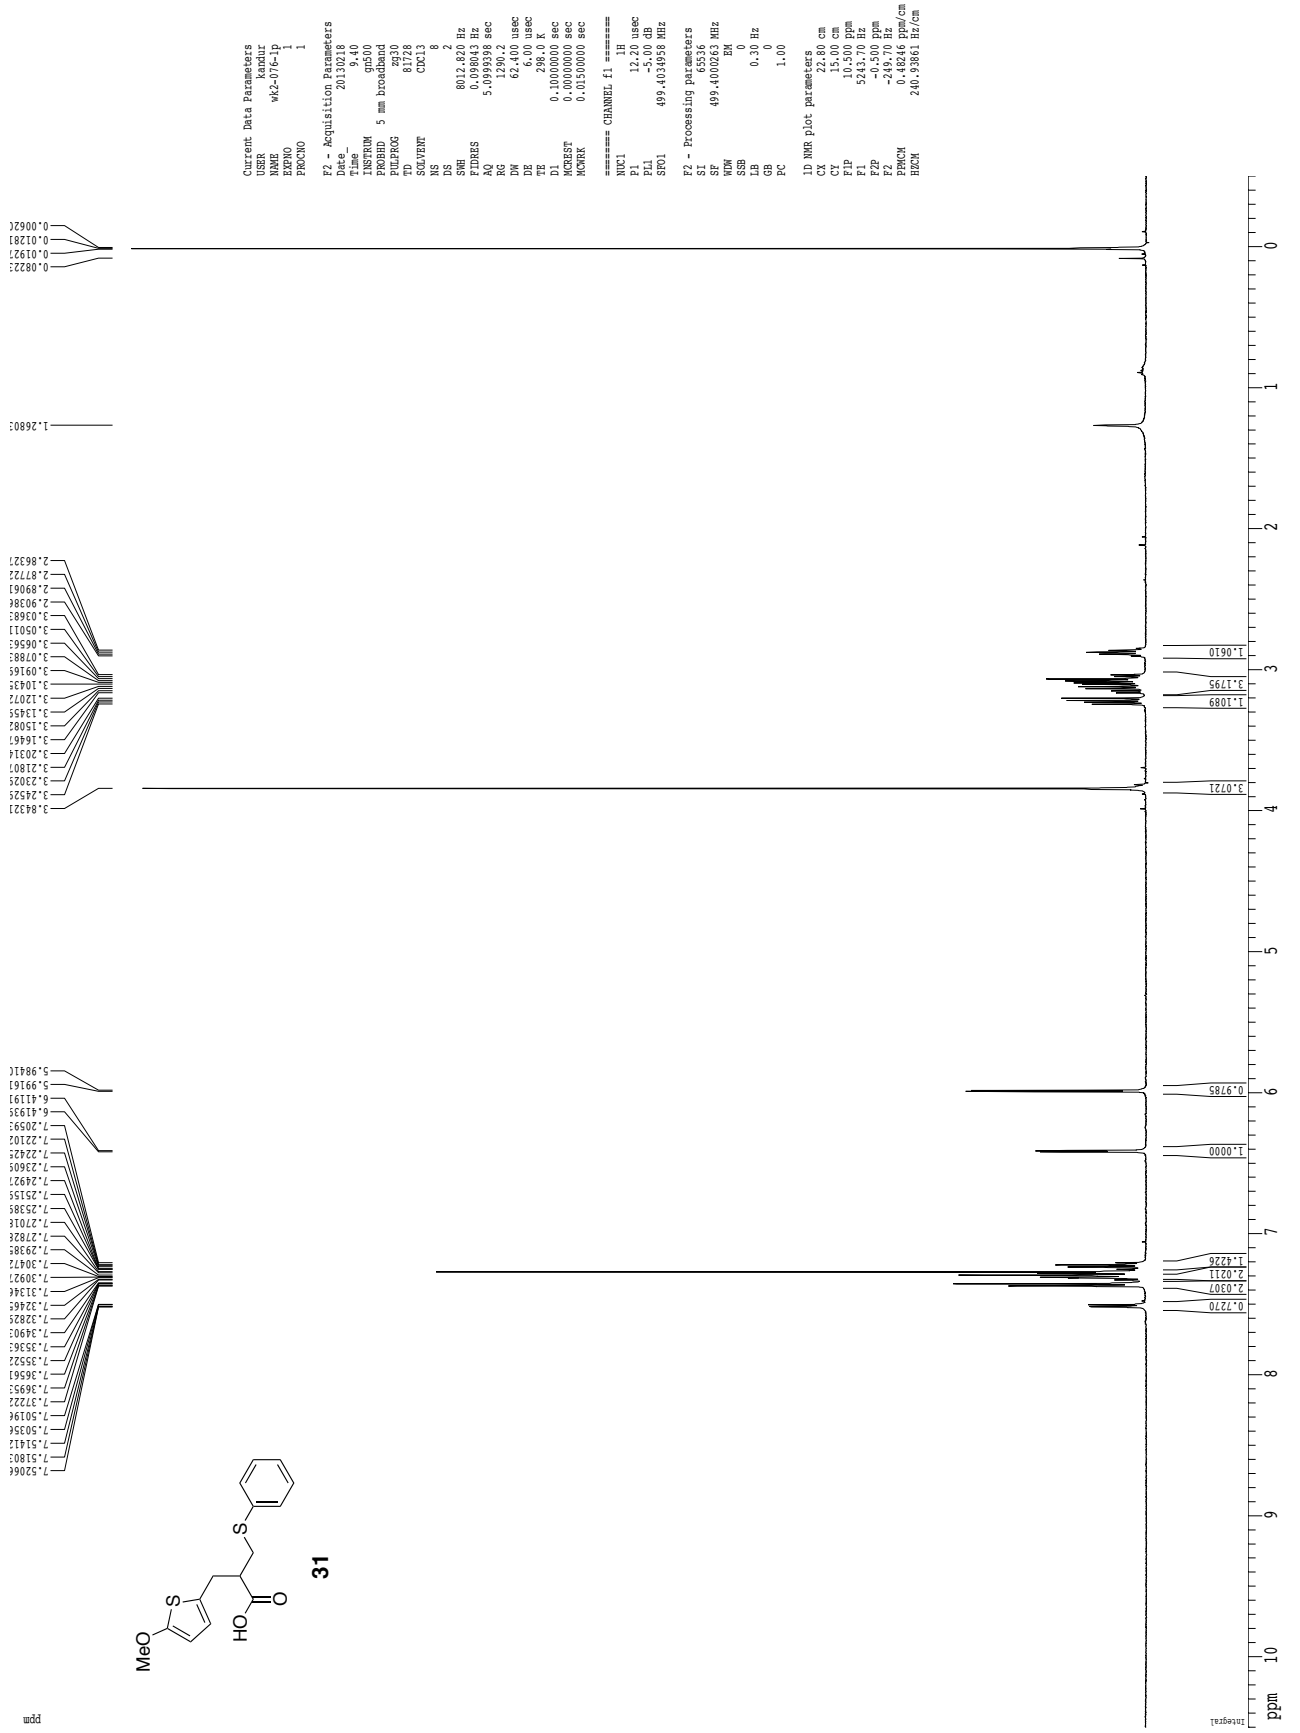

## Z-restored spin-echo 13C spectrum with 1H decoupling

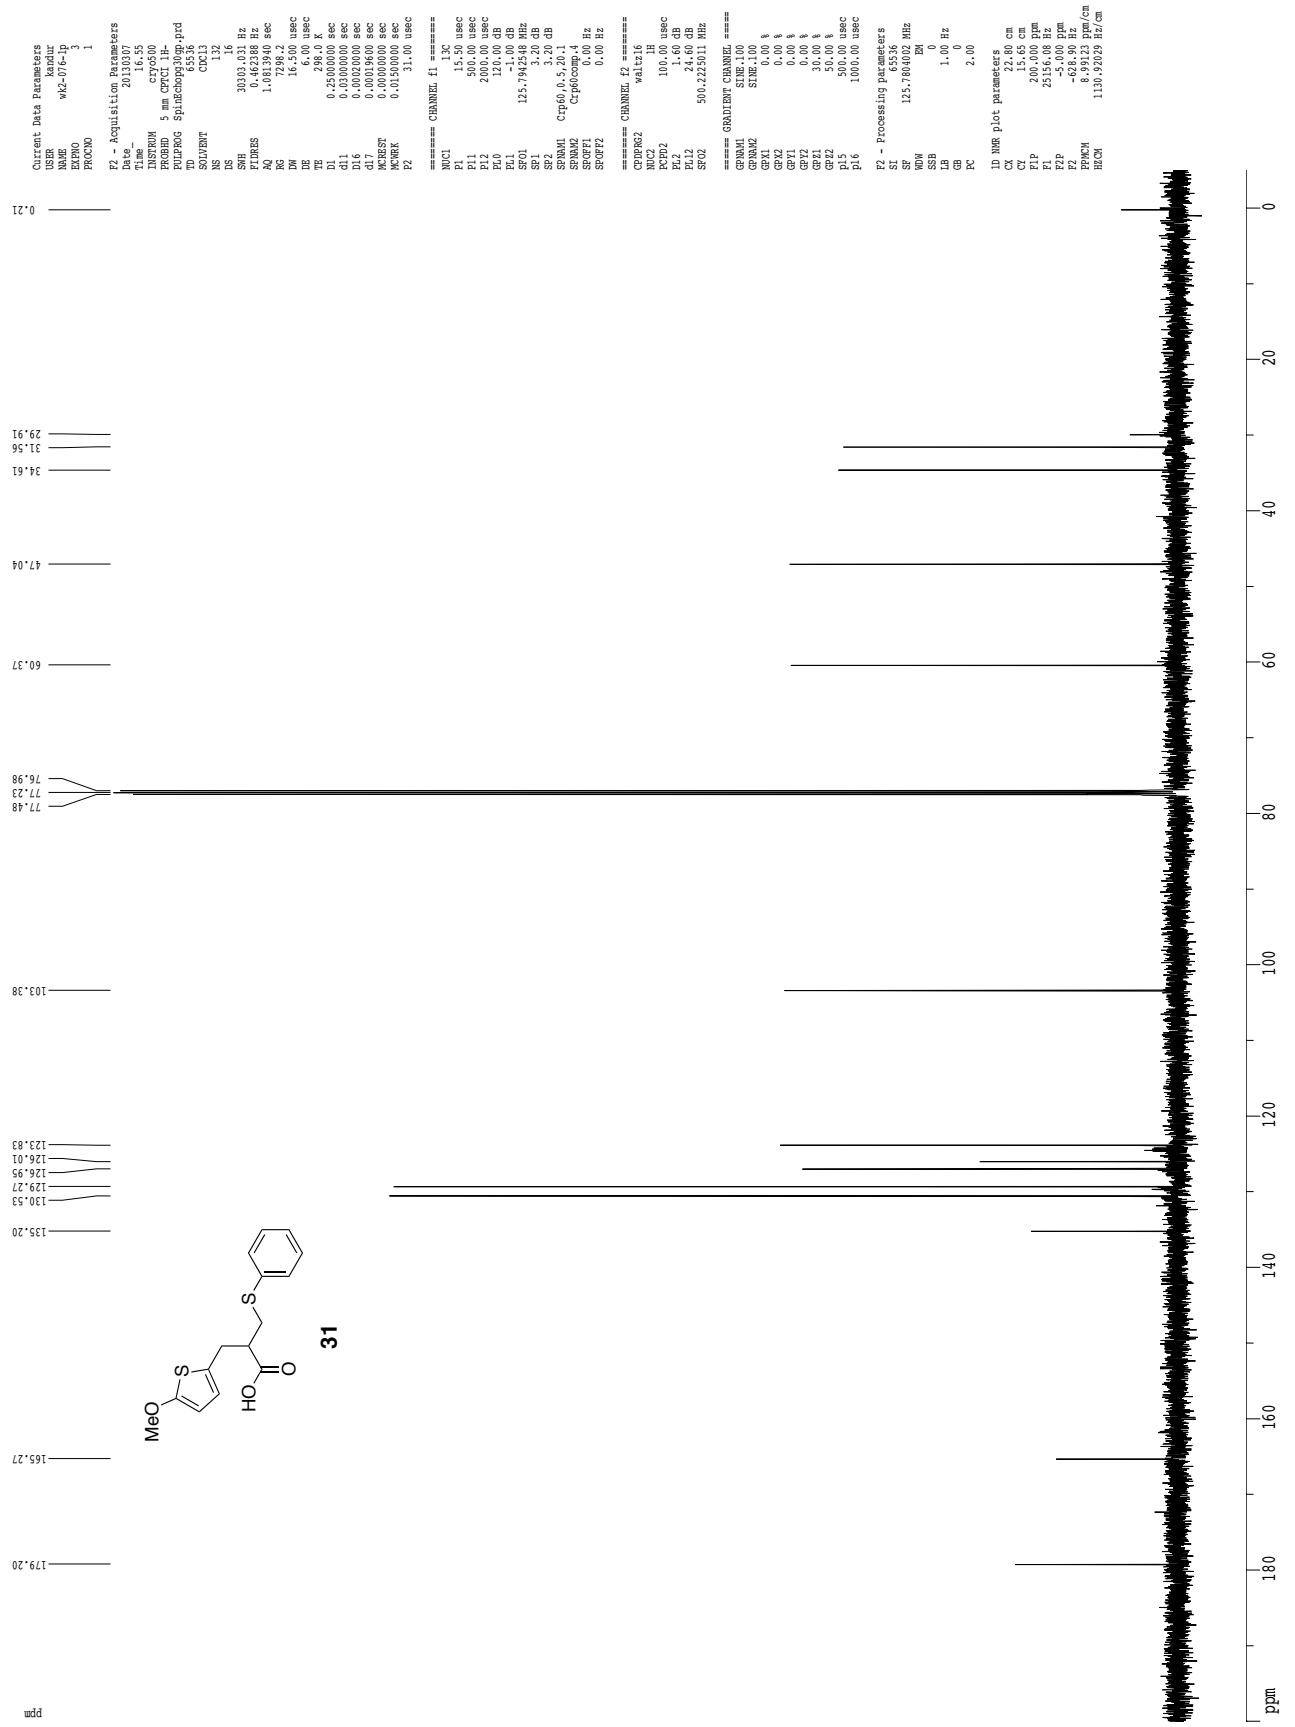



<sup>1</sup>H spectrum

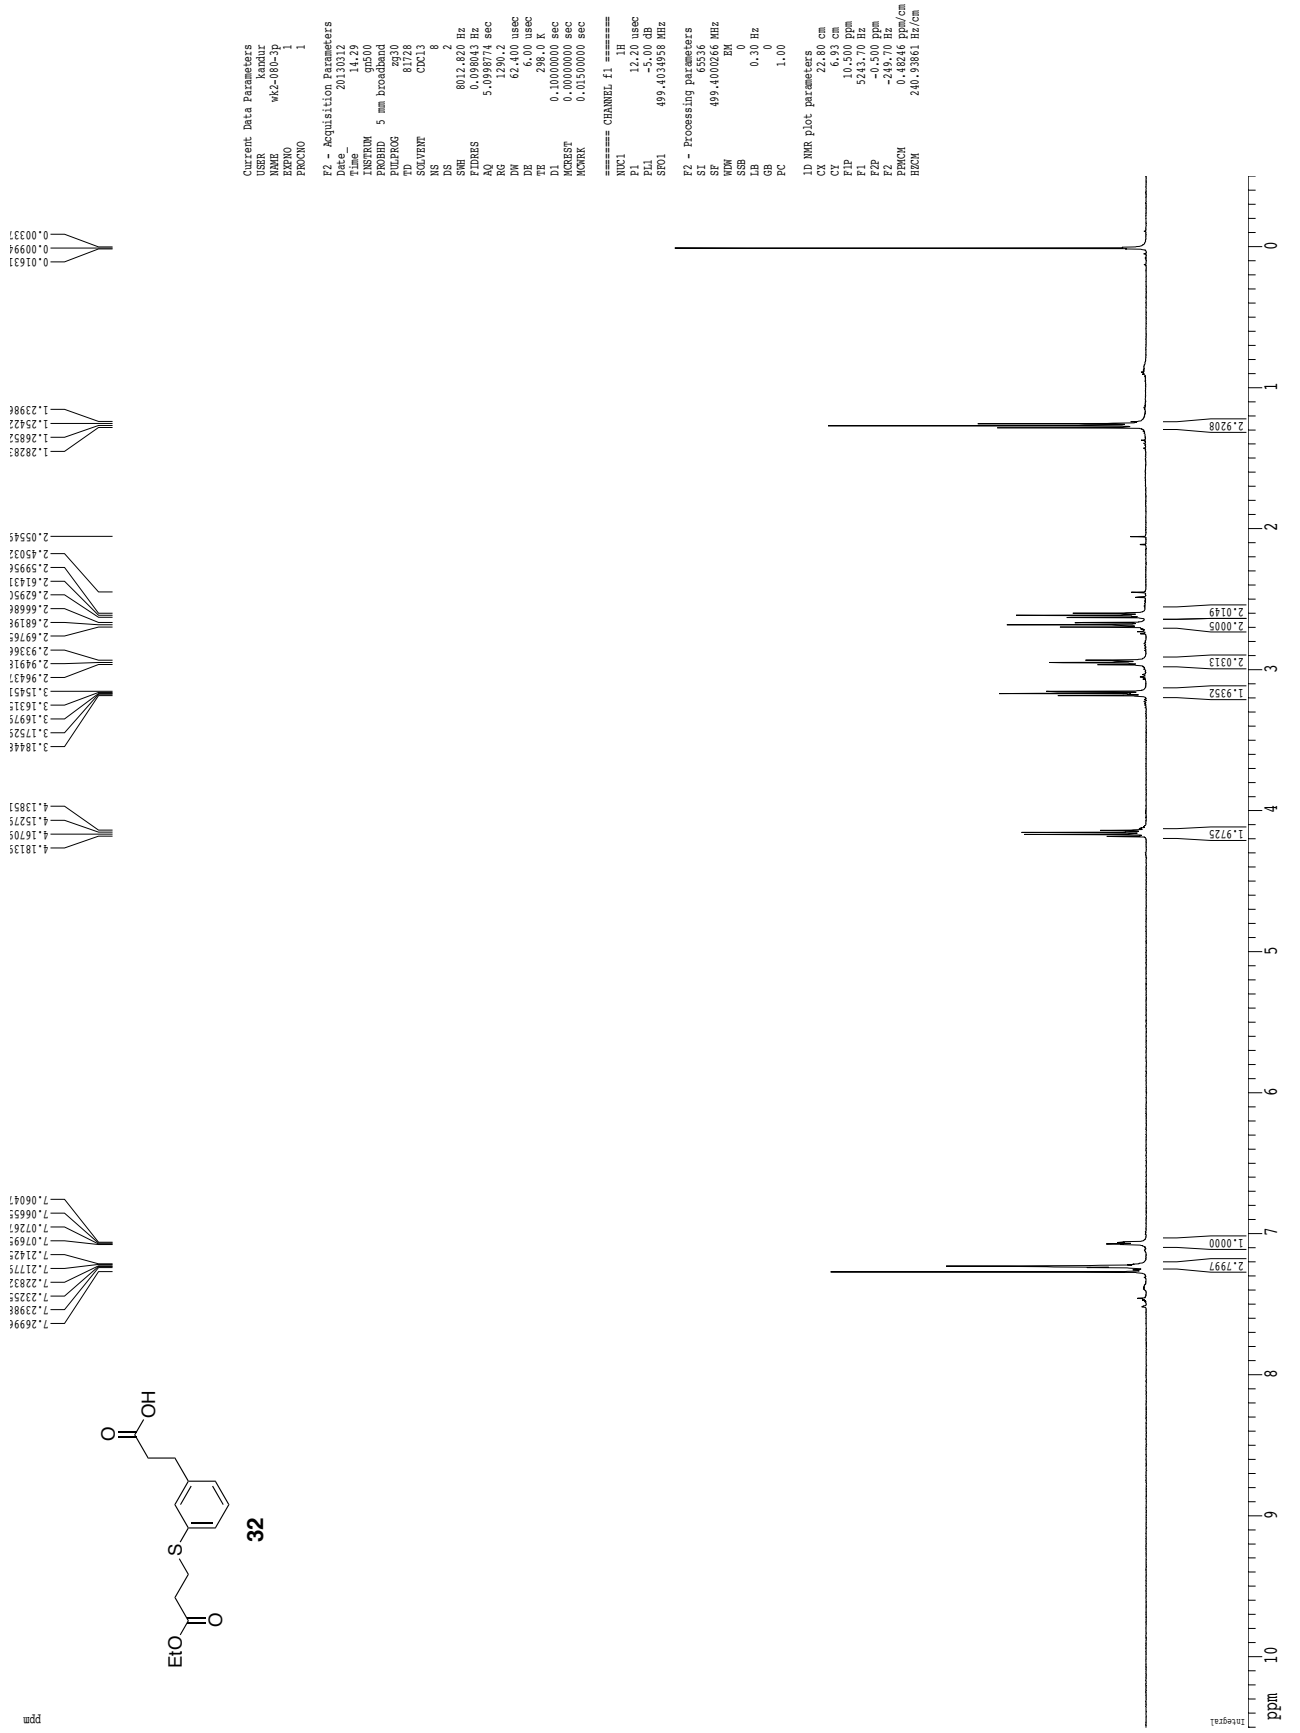

32

Z-restored spin-echo 13C spectrum with 1H decoupling

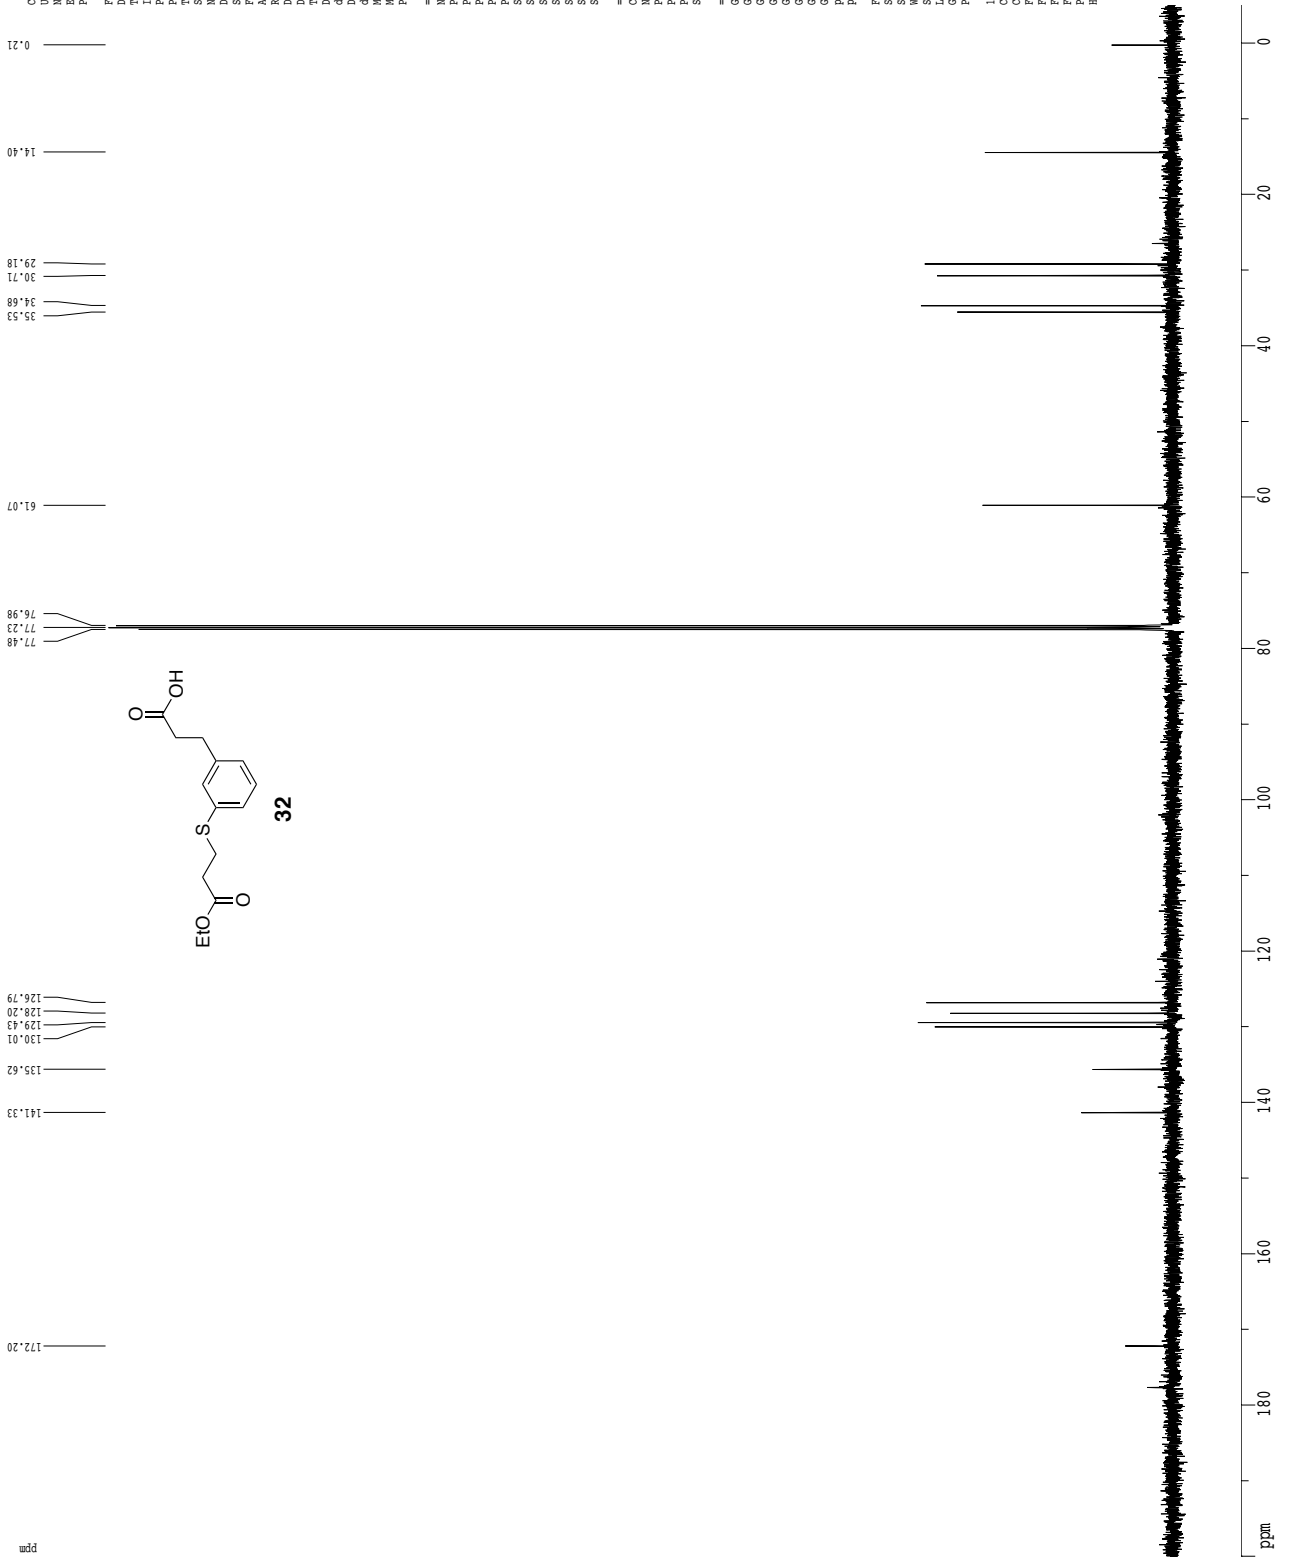

```

Current Data Parameters
=====
USER          Mandur
NAME          WZ-080-3
EXPNO         2
PROCNO       1

F2 - Acquisition Parameters
=====
Date_         20160312
Time         14.42
INSTRUM      cryso00
PROBHD       5 mm CPYCI 1H-
PULPROG      zgpg30
SOLVENT      CDCl3
NS           423
DS           16
SHE         30001.031 Bz
AQ          1.683888 sec
RG          1.0813840 sec
K3          13004
DM          16.200 usec
DE          6.00 usec
TE          300.2 K
D1          0.25000000 sec
d11         0.03000000 sec
d12         0.00020000 sec
d13         0.00039600 sec
d14         0.00039600 sec
d15         0.00039600 sec
d16         0.00039600 sec
d17         0.00039600 sec
d18         0.00039600 sec
d19         0.00039600 sec
d20         0.00039600 sec
d21         0.00039600 sec
d22         0.00039600 sec
d23         0.00039600 sec
d24         0.00039600 sec
d25         0.00039600 sec
d26         0.00039600 sec
d27         0.00039600 sec
d28         0.00039600 sec
d29         0.00039600 sec
d30         0.00039600 sec
d31         0.00039600 sec
d32         0.00039600 sec
d33         0.00039600 sec
d34         0.00039600 sec
d35         0.00039600 sec
d36         0.00039600 sec
d37         0.00039600 sec
d38         0.00039600 sec
d39         0.00039600 sec
d40         0.00039600 sec
d41         0.00039600 sec
d42         0.00039600 sec
d43         0.00039600 sec
d44         0.00039600 sec
d45         0.00039600 sec
d46         0.00039600 sec
d47         0.00039600 sec
d48         0.00039600 sec
d49         0.00039600 sec
d50         0.00039600 sec
d51         0.00039600 sec
d52         0.00039600 sec
d53         0.00039600 sec
d54         0.00039600 sec
d55         0.00039600 sec
d56         0.00039600 sec
d57         0.00039600 sec
d58         0.00039600 sec
d59         0.00039600 sec
d60         0.00039600 sec
d61         0.00039600 sec
d62         0.00039600 sec
d63         0.00039600 sec
d64         0.00039600 sec
d65         0.00039600 sec
d66         0.00039600 sec
d67         0.00039600 sec
d68         0.00039600 sec
d69         0.00039600 sec
d70         0.00039600 sec
d71         0.00039600 sec
d72         0.00039600 sec
d73         0.00039600 sec
d74         0.00039600 sec
d75         0.00039600 sec
d76         0.00039600 sec
d77         0.00039600 sec
d78         0.00039600 sec
d79         0.00039600 sec
d80         0.00039600 sec
d81         0.00039600 sec
d82         0.00039600 sec
d83         0.00039600 sec
d84         0.00039600 sec
d85         0.00039600 sec
d86         0.00039600 sec
d87         0.00039600 sec
d88         0.00039600 sec
d89         0.00039600 sec
d90         0.00039600 sec
d91         0.00039600 sec
d92         0.00039600 sec
d93         0.00039600 sec
d94         0.00039600 sec
d95         0.00039600 sec
d96         0.00039600 sec
d97         0.00039600 sec
d98         0.00039600 sec
d99         0.00039600 sec
d100        0.00039600 sec

===== CHANNEL f1 =====
NUC1          13C
P1           15.50 usec
PL1          0.00 dB
PC1          500.00 usec
P2           2000.00 usec
PL2          120.00 dB
PC2          120.00 dB
SFO1         125.762548 MHz
SF1          3.20 dB
SF2          3.20 dB
SFO2         125.762548 MHz
SF3          3.20 dB
SFO3         125.762548 MHz
SFO4         125.762548 MHz
SFO5         125.762548 MHz
SFO6         125.762548 MHz
SFO7         125.762548 MHz
SFO8         125.762548 MHz
SFO9         125.762548 MHz
SFO10        125.762548 MHz
SFO11        125.762548 MHz
SFO12        125.762548 MHz
SFO13        125.762548 MHz
SFO14        125.762548 MHz
SFO15        125.762548 MHz
SFO16        125.762548 MHz
SFO17        125.762548 MHz
SFO18        125.762548 MHz
SFO19        125.762548 MHz
SFO20        125.762548 MHz
SFO21        125.762548 MHz
SFO22        125.762548 MHz
SFO23        125.762548 MHz
SFO24        125.762548 MHz
SFO25        125.762548 MHz
SFO26        125.762548 MHz
SFO27        125.762548 MHz
SFO28        125.762548 MHz
SFO29        125.762548 MHz
SFO30        125.762548 MHz
SFO31        125.762548 MHz
SFO32        125.762548 MHz
SFO33        125.762548 MHz
SFO34        125.762548 MHz
SFO35        125.762548 MHz
SFO36        125.762548 MHz
SFO37        125.762548 MHz
SFO38        125.762548 MHz
SFO39        125.762548 MHz
SFO40        125.762548 MHz
SFO41        125.762548 MHz
SFO42        125.762548 MHz
SFO43        125.762548 MHz
SFO44        125.762548 MHz
SFO45        125.762548 MHz
SFO46        125.762548 MHz
SFO47        125.762548 MHz
SFO48        125.762548 MHz
SFO49        125.762548 MHz
SFO50        125.762548 MHz
SFO51        125.762548 MHz
SFO52        125.762548 MHz
SFO53        125.762548 MHz
SFO54        125.762548 MHz
SFO55        125.762548 MHz
SFO56        125.762548 MHz
SFO57        125.762548 MHz
SFO58        125.762548 MHz
SFO59        125.762548 MHz
SFO60        125.762548 MHz
SFO61        125.762548 MHz
SFO62        125.762548 MHz
SFO63        125.762548 MHz
SFO64        125.762548 MHz
SFO65        125.762548 MHz
SFO66        125.762548 MHz
SFO67        125.762548 MHz
SFO68        125.762548 MHz
SFO69        125.762548 MHz
SFO70        125.762548 MHz
SFO71        125.762548 MHz
SFO72        125.762548 MHz
SFO73        125.762548 MHz
SFO74        125.762548 MHz
SFO75        125.762548 MHz
SFO76        125.762548 MHz
SFO77        125.762548 MHz
SFO78        125.762548 MHz
SFO79        125.762548 MHz
SFO80        125.762548 MHz
SFO81        125.762548 MHz
SFO82        125.762548 MHz
SFO83        125.762548 MHz
SFO84        125.762548 MHz
SFO85        125.762548 MHz
SFO86        125.762548 MHz
SFO87        125.762548 MHz
SFO88        125.762548 MHz
SFO89        125.762548 MHz
SFO90        125.762548 MHz
SFO91        125.762548 MHz
SFO92        125.762548 MHz
SFO93        125.762548 MHz
SFO94        125.762548 MHz
SFO95        125.762548 MHz
SFO96        125.762548 MHz
SFO97        125.762548 MHz
SFO98        125.762548 MHz
SFO99        125.762548 MHz
SFO100       125.762548 MHz

===== CHANNEL f2 =====
NAME         waltz16
NUC2          13C
P2           15.50 usec
PL2          0.00 dB
PC2          500.00 usec
P3           2000.00 usec
PL3          120.00 dB
PC3          120.00 dB
SFO1         125.762548 MHz
SF1          3.20 dB
SF2          3.20 dB
SFO2         125.762548 MHz
SF3          3.20 dB
SFO3         125.762548 MHz
SF4          3.20 dB
SFO4         125.762548 MHz
SF5          3.20 dB
SFO5         125.762548 MHz
SF6          3.20 dB
SFO6         125.762548 MHz
SF7          3.20 dB
SFO7         125.762548 MHz
SF8          3.20 dB
SFO8         125.762548 MHz
SF9          3.20 dB
SFO9         125.762548 MHz
SF10         3.20 dB
SFO10        125.762548 MHz
SF11         3.20 dB
SFO11        125.762548 MHz
SF12         3.20 dB
SFO12        125.762548 MHz
SF13         3.20 dB
SFO13        125.762548 MHz
SF14         3.20 dB
SFO14        125.762548 MHz
SF15         3.20 dB
SFO15        125.762548 MHz
SF16         3.20 dB
SFO16        125.762548 MHz
SF17         3.20 dB
SFO17        125.762548 MHz
SF18         3.20 dB
SFO18        125.762548 MHz
SF19         3.20 dB
SFO19        125.762548 MHz
SF20         3.20 dB
SFO20        125.762548 MHz
SF21         3.20 dB
SFO21        125.762548 MHz
SF22         3.20 dB
SFO22        125.762548 MHz
SF23         3.20 dB
SFO23        125.762548 MHz
SF24         3.20 dB
SFO24        125.762548 MHz
SF25         3.20 dB
SFO25        125.762548 MHz
SF26         3.20 dB
SFO26        125.762548 MHz
SF27         3.20 dB
SFO27        125.762548 MHz
SF28         3.20 dB
SFO28        125.762548 MHz
SF29         3.20 dB
SFO29        125.762548 MHz
SF30         3.20 dB
SFO30        125.762548 MHz
SF31         3.20 dB
SFO31        125.762548 MHz
SF32         3.20 dB
SFO32        125.762548 MHz
SF33         3.20 dB
SFO33        125.762548 MHz
SF34         3.20 dB
SFO34        125.762548 MHz
SF35         3.20 dB
SFO35        125.762548 MHz
SF36         3.20 dB
SFO36        125.762548 MHz
SF37         3.20 dB
SFO37        125.762548 MHz
SF38         3.20 dB
SFO38        125.762548 MHz
SF39         3.20 dB
SFO39        125.762548 MHz
SF40         3.20 dB
SFO40        125.762548 MHz
SF41         3.20 dB
SFO41        125.762548 MHz
SF42         3.20 dB
SFO42        125.762548 MHz
SF43         3.20 dB
SFO43        125.762548 MHz
SF44         3.20 dB
SFO44        125.762548 MHz
SF45         3.20 dB
SFO45        125.762548 MHz
SF46         3.20 dB
SFO46        125.762548 MHz
SF47         3.20 dB
SFO47        125.762548 MHz
SF48         3.20 dB
SFO48        125.762548 MHz
SF49         3.20 dB
SFO49        125.762548 MHz
SF50         3.20 dB
SFO50        125.762548 MHz
SF51         3.20 dB
SFO51        125.762548 MHz
SF52         3.20 dB
SFO52        125.762548 MHz
SF53         3.20 dB
SFO53        125.762548 MHz
SF54         3.20 dB
SFO54        125.762548 MHz
SF55         3.20 dB
SFO55        125.762548 MHz
SF56         3.20 dB
SFO56        125.762548 MHz
SF57         3.20 dB
SFO57        125.762548 MHz
SF58         3.20 dB
SFO58        125.762548 MHz
SF59         3.20 dB
SFO59        125.762548 MHz
SF60         3.20 dB
SFO60        125.762548 MHz
SF61         3.20 dB
SFO61        125.762548 MHz
SF62         3.20 dB
SFO62        125.762548 MHz
SF63         3.20 dB
SFO63        125.762548 MHz
SF64         3.20 dB
SFO64        125.762548 MHz
SF65         3.20 dB
SFO65        125.762548 MHz
SF66         3.20 dB
SFO66        125.762548 MHz
SF67         3.20 dB
SFO67        125.762548 MHz
SF68         3.20 dB
SFO68        125.762548 MHz
SF69         3.20 dB
SFO69        125.762548 MHz
SF70         3.20 dB
SFO70        125.762548 MHz
SF71         3.20 dB
SFO71        125.762548 MHz
SF72         3.20 dB
SFO72        125.762548 MHz
SF73         3.20 dB
SFO73        125.762548 MHz
SF74         3.20 dB
SFO74        125.762548 MHz
SF75         3.20 dB
SFO75        125.762548 MHz
SF76         3.20 dB
SFO76        125.762548 MHz
SF77         3.20 dB
SFO77        125.762548 MHz
SF78         3.20 dB
SFO78        125.762548 MHz
SF79         3.20 dB
SFO79        125.762548 MHz
SF80         3.20 dB
SFO80        125.762548 MHz
SF81         3.20 dB
SFO81        125.762548 MHz
SF82         3.20 dB
SFO82        125.762548 MHz
SF83         3.20 dB
SFO83        125.762548 MHz
SF84         3.20 dB
SFO84        125.762548 MHz
SF85         3.20 dB
SFO85        125.762548 MHz
SF86         3.20 dB
SFO86        125.762548 MHz
SF87         3.20 dB
SFO87        125.762548 MHz
SF88         3.20 dB
SFO88        125.762548 MHz
SF89         3.20 dB
SFO89        125.762548 MHz
SF90         3.20 dB
SFO90        125.762548 MHz
SF91         3.20 dB
SFO91        125.762548 MHz
SF92         3.20 dB
SFO92        125.762548 MHz
SF93         3.20 dB
SFO93        125.762548 MHz
SF94         3.20 dB
SFO94        125.762548 MHz
SF95         3.20 dB
SFO95        125.762548 MHz
SF96         3.20 dB
SFO96        125.762548 MHz
SF97         3.20 dB
SFO97        125.762548 MHz
SF98         3.20 dB
SFO98        125.762548 MHz
SF99         3.20 dB
SFO99        125.762548 MHz
SF100        3.20 dB
SFO100       125.762548 MHz

===== GRADIENT CHANNEL =====
GPMAX1       1.00
GPMAX2       1.00
GPMAX3       1.00
GPMAX4       1.00
GPMAX5       1.00
GPMAX6       1.00
GPMAX7       1.00
GPMAX8       1.00
GPMAX9       1.00
GPMAX10      1.00
GPMAX11      1.00
GPMAX12      1.00
GPMAX13      1.00
GPMAX14      1.00
GPMAX15      1.00
GPMAX16      1.00
GPMAX17      1.00
GPMAX18      1.00
GPMAX19      1.00
GPMAX20      1.00
GPMAX21      1.00
GPMAX22      1.00
GPMAX23      1.00
GPMAX24      1.00
GPMAX25      1.00
GPMAX26      1.00
GPMAX27      1.00
GPMAX28      1.00
GPMAX29      1.00
GPMAX30      1.00
GPMAX31      1.00
GPMAX32      1.00
GPMAX33      1.00
GPMAX34      1.00
GPMAX35      1.00
GPMAX36      1.00
GPMAX37      1.00
GPMAX38      1.00
GPMAX39      1.00
GPMAX40      1.00
GPMAX41      1.00
GPMAX42      1.00
GPMAX43      1.00
GPMAX44      1.00
GPMAX45      1.00
GPMAX46      1.00
GPMAX47      1.00
GPMAX48      1.00
GPMAX49      1.00
GPMAX50      1.00
GPMAX51      1.00
GPMAX52      1.00
GPMAX53      1.00
GPMAX54      1.00
GPMAX55      1.00
GPMAX56      1.00
GPMAX57      1.00
GPMAX58      1.00
GPMAX59      1.00
GPMAX60      1.00
GPMAX61      1.00
GPMAX62      1.00
GPMAX63      1.00
GPMAX64      1.00
GPMAX65      1.00
GPMAX66      1.00
GPMAX67      1.00
GPMAX68      1.00
GPMAX69      1.00
GPMAX70      1.00
GPMAX71      1.00
GPMAX72      1.00
GPMAX73      1.00
GPMAX74      1.00
GPMAX75      1.00
GPMAX76      1.00
GPMAX77      1.00
GPMAX78      1.00
GPMAX79      1.00
GPMAX80      1.00
GPMAX81      1.00
GPMAX82      1.00
GPMAX83      1.00
GPMAX84      1.00
GPMAX85      1.00
GPMAX86      1.00
GPMAX87      1.00
GPMAX88      1.00
GPMAX89      1.00
GPMAX90      1.00
GPMAX91      1.00
GPMAX92      1.00
GPMAX93      1.00
GPMAX94      1.00
GPMAX95      1.00
GPMAX96      1.00
GPMAX97      1.00
GPMAX98      1.00
GPMAX99      1.00
GPMAX100     1.00

===== Processing parameters =====
SI           32768
SF           125.762548 MHz
WDW          EM
SSB          0
GB           0
PC           2.00
SC           0

ID NMR plot parameters
=====
CT          22.80 cm
PI          200.000000 pnm
F1          25156.08 Bz
F2          -5.000000 pnm
F3          -628.91 Bz
F4          -628.91 Bz/cm
F5          1130.82029 Bz/cm
  
```

<sup>1</sup>H spectrum

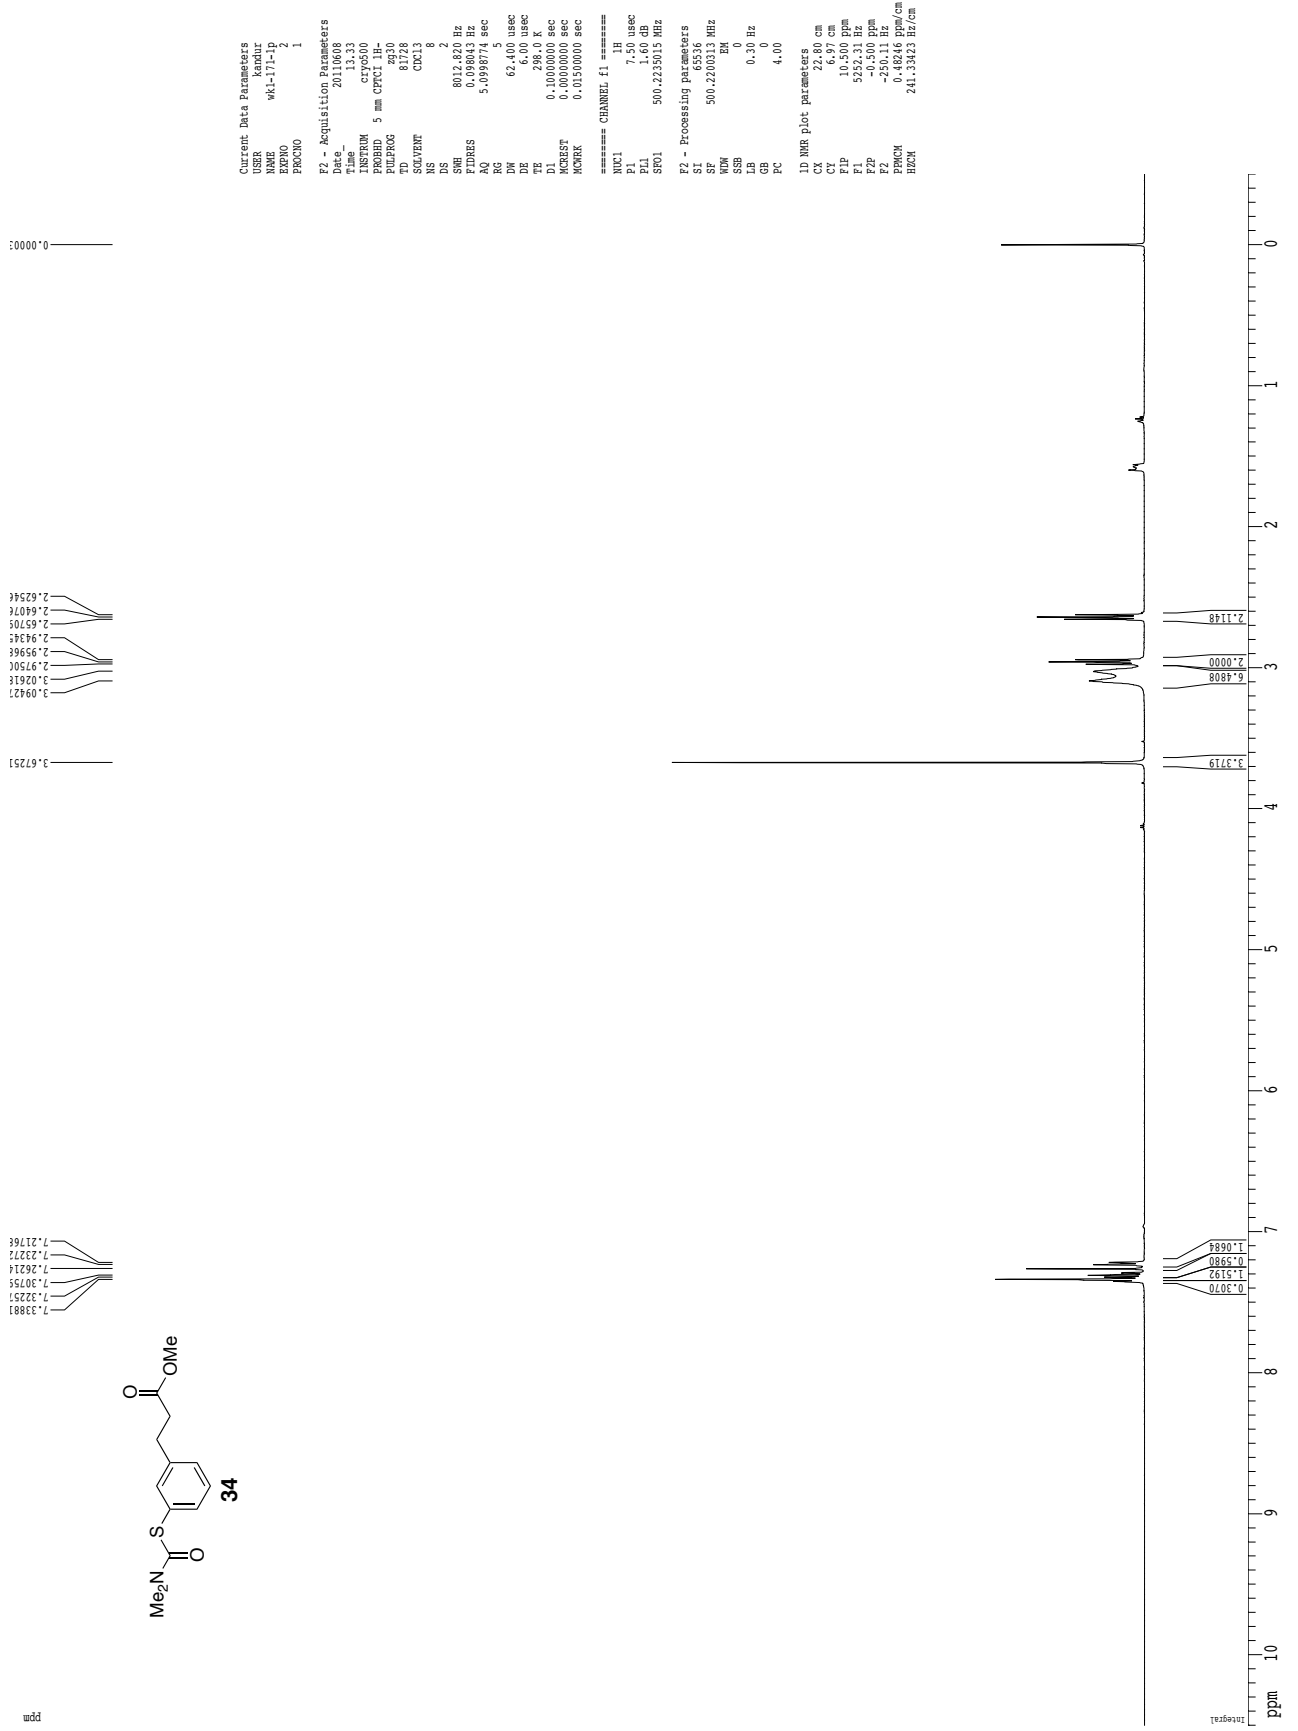

Z-restored spin-echo 13C spectrum with 1H decoupling

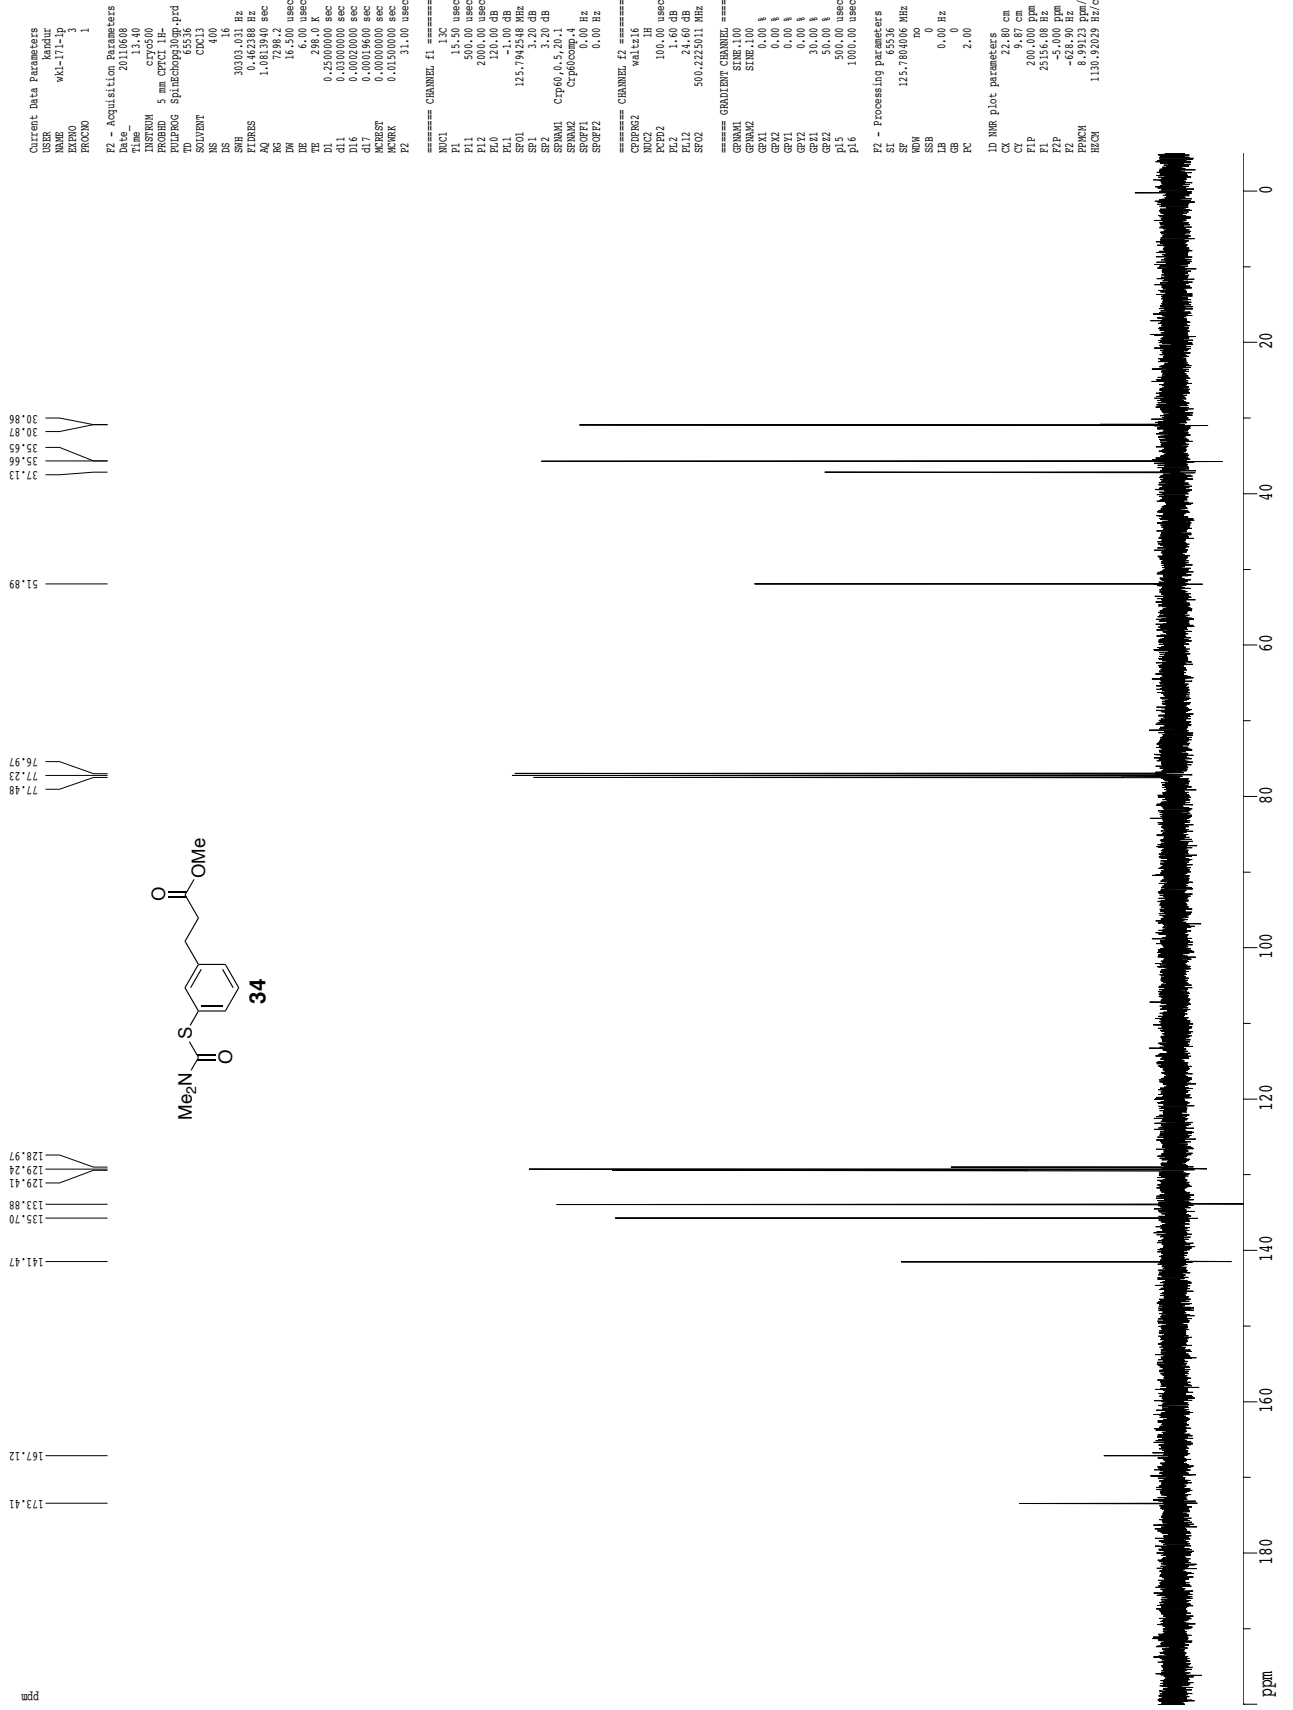

<sup>1</sup>H spectrum

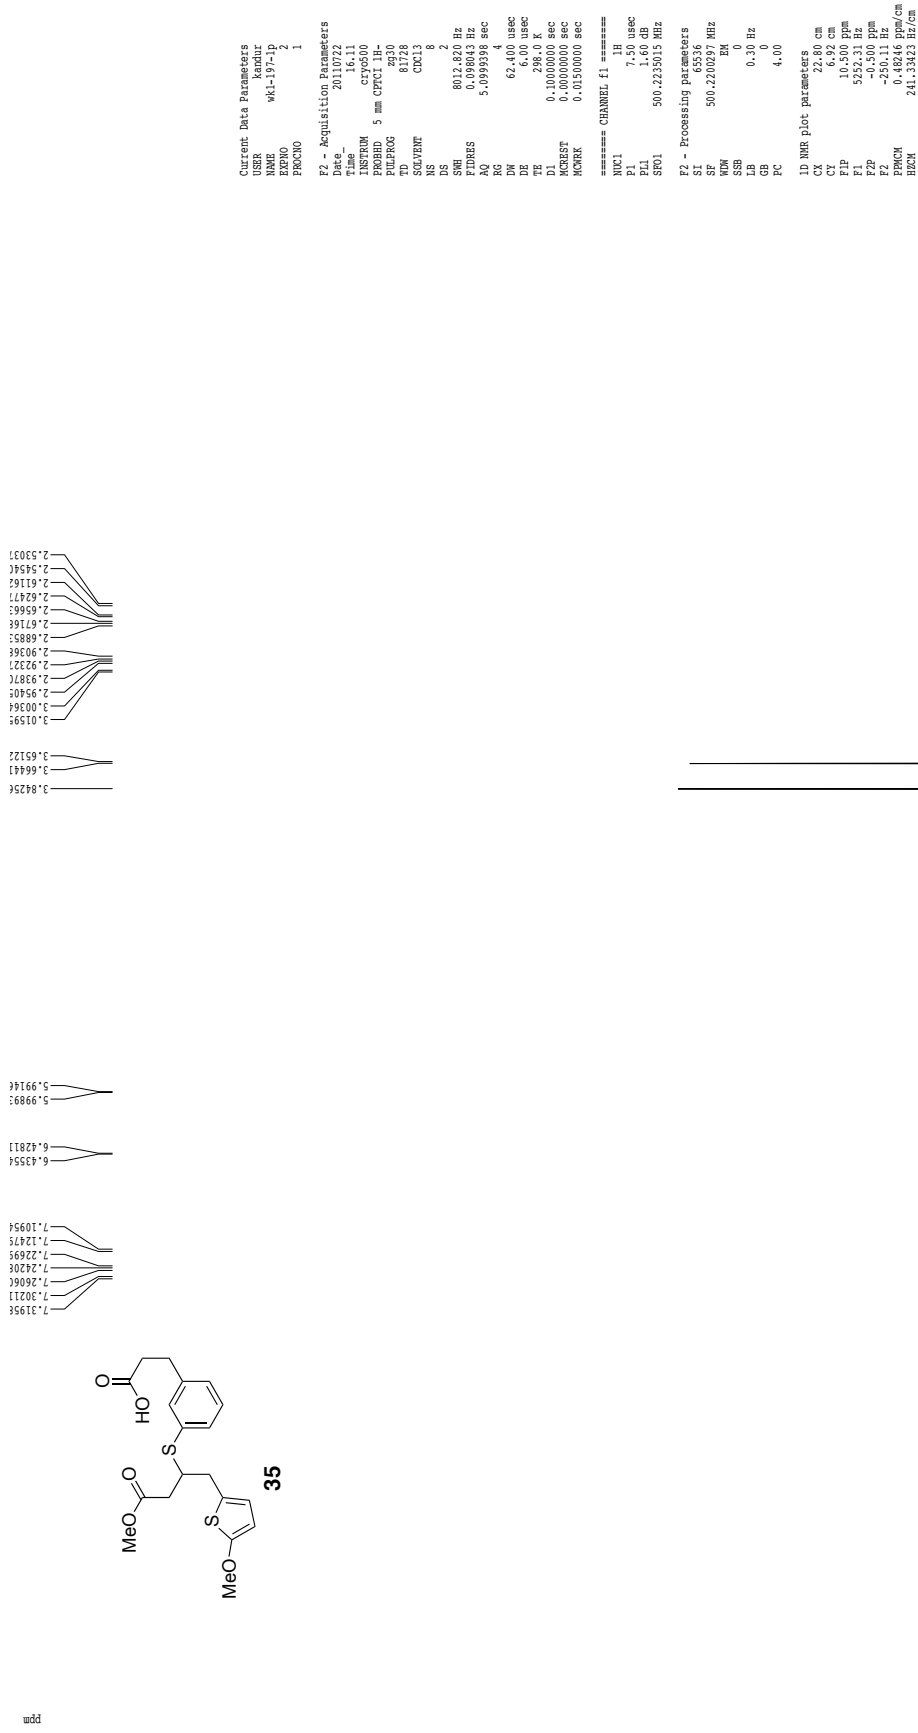

Z-restored spin-echo 13C spectrum with 1H decoupling

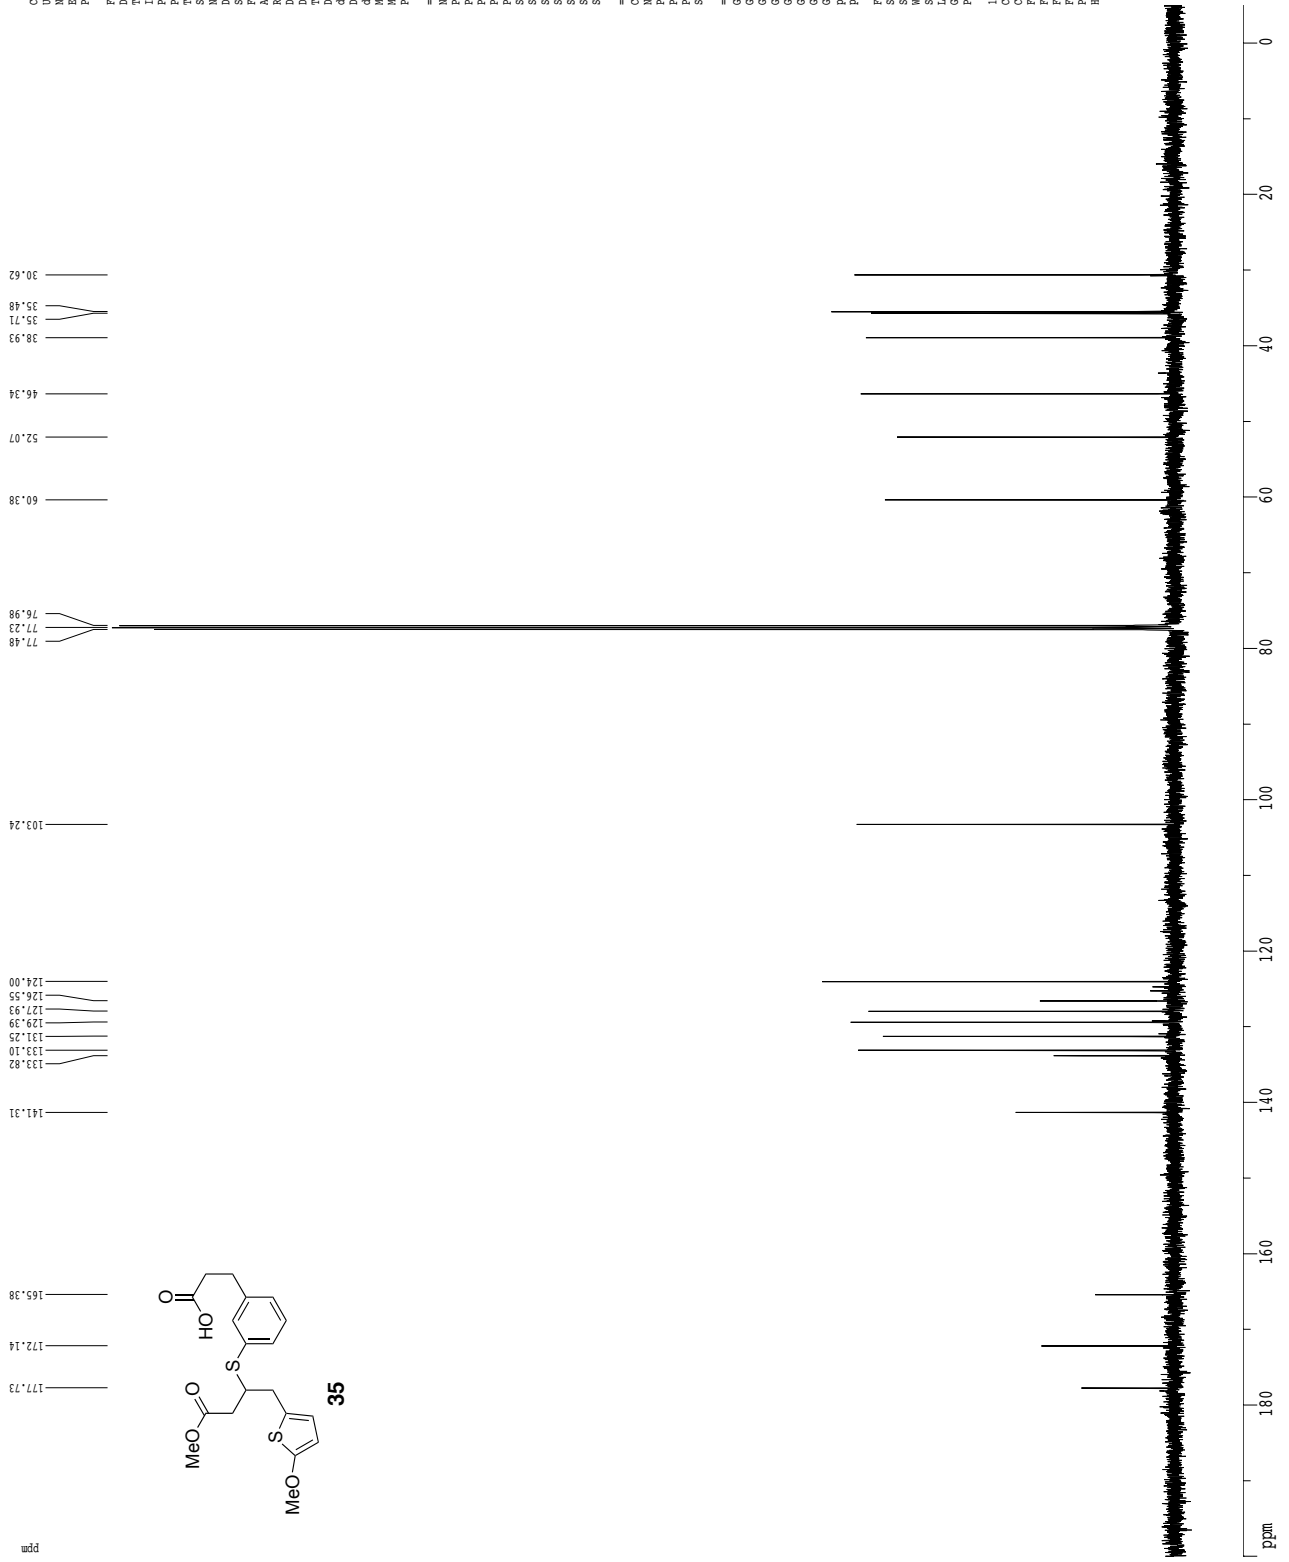

```

Current Data Parameters
=====
USER          Kandur
PROBHD        WAI-37-13
PROCNO        1
F2 - Acquisition Parameters
=====
Date_         2016.07.22
Time          16.16
INSTRUM      cryso00
PROBHD       5 mm CPYCI 1H-
PULPROG      SpunEchoJgprsd
SOLVENT      CDCl3
NS           464
DS           4
SHE          3003.031 Bz
FIDRES       1.643105 Hz
AQ           1.0414105 sec
RG           7298.2
DM           16.200 usec
DE           6.00 usec
TE           300.2 K
D1           0.2500000 sec
d11          0.0300000 sec
d16          0.0002000 sec
d17          0.0003900 sec
DELTA        7.0000000 sec
MORPH        0.0300000 sec
PC           31.00 usec
F2 - Processing parameters
=====
SI           125.760392 MHz
SF           125.760392 MHz
WDW          EM
SSB          0
GB           0
PC           2.00
ID NMR plot parameters
=====
CT           22.80 cm
CT2          22.80 cm
PI1         200.00000000
PI2         25356.08 Bz
F1          -5.00000000
F2          -6283.91 Bz
NUC1         13
NUC2         13
HSCN        1130.82029 Hz/cm
    
```

<sup>1</sup>H spectrum

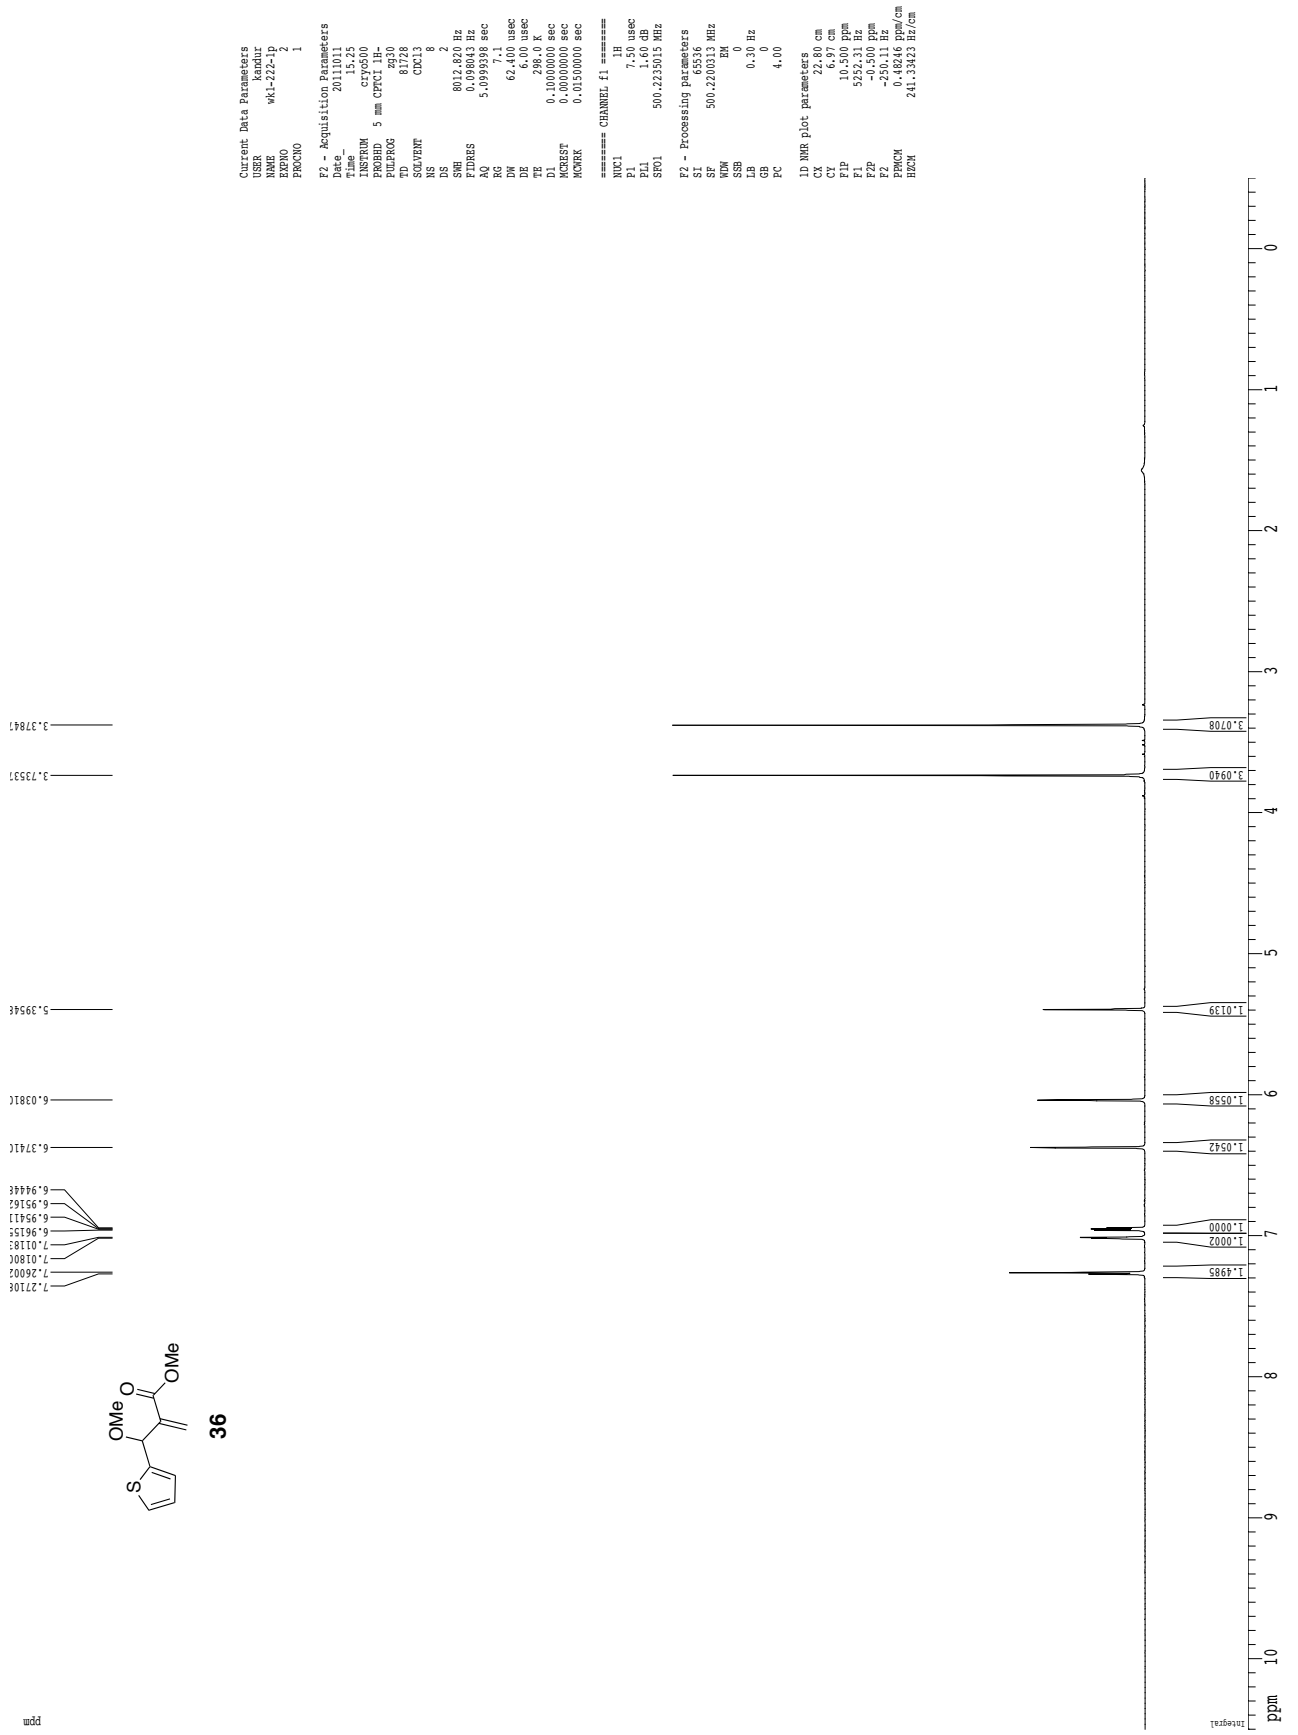

Z-restored spin-echo 13C spectrum with 1H decoupling

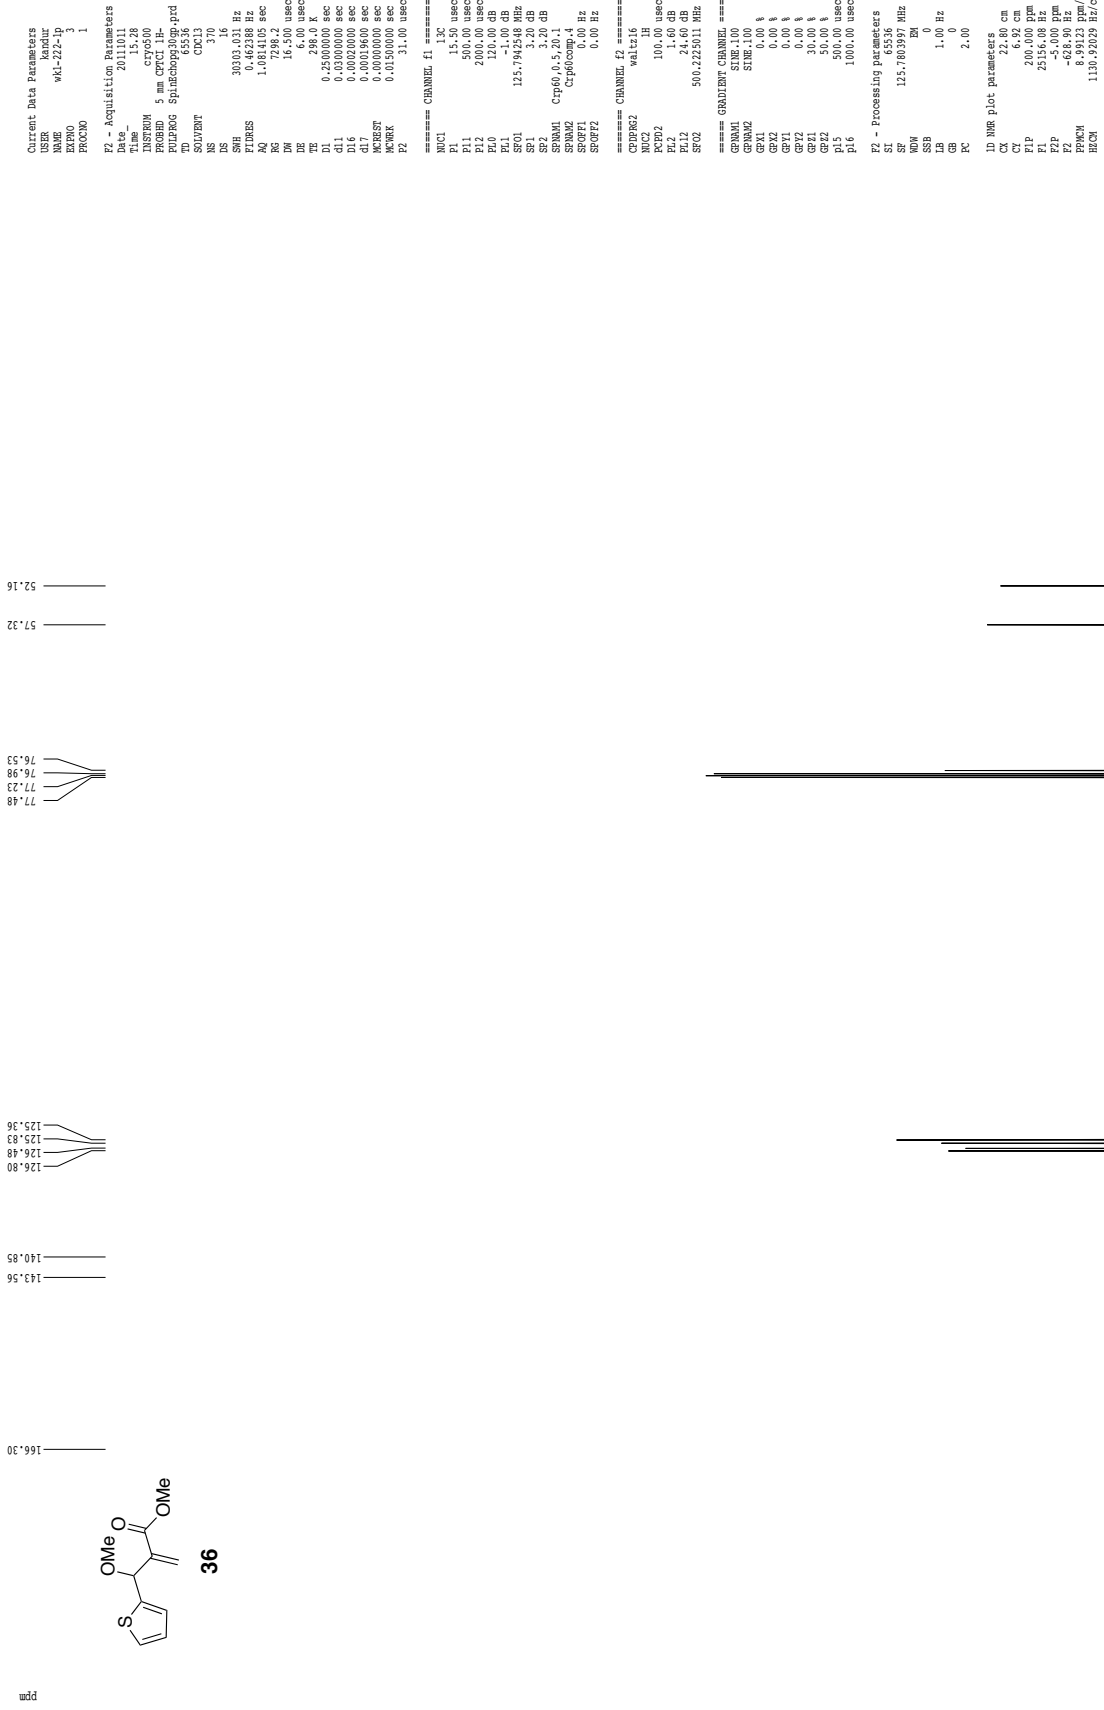



<sup>1</sup>H spectrum

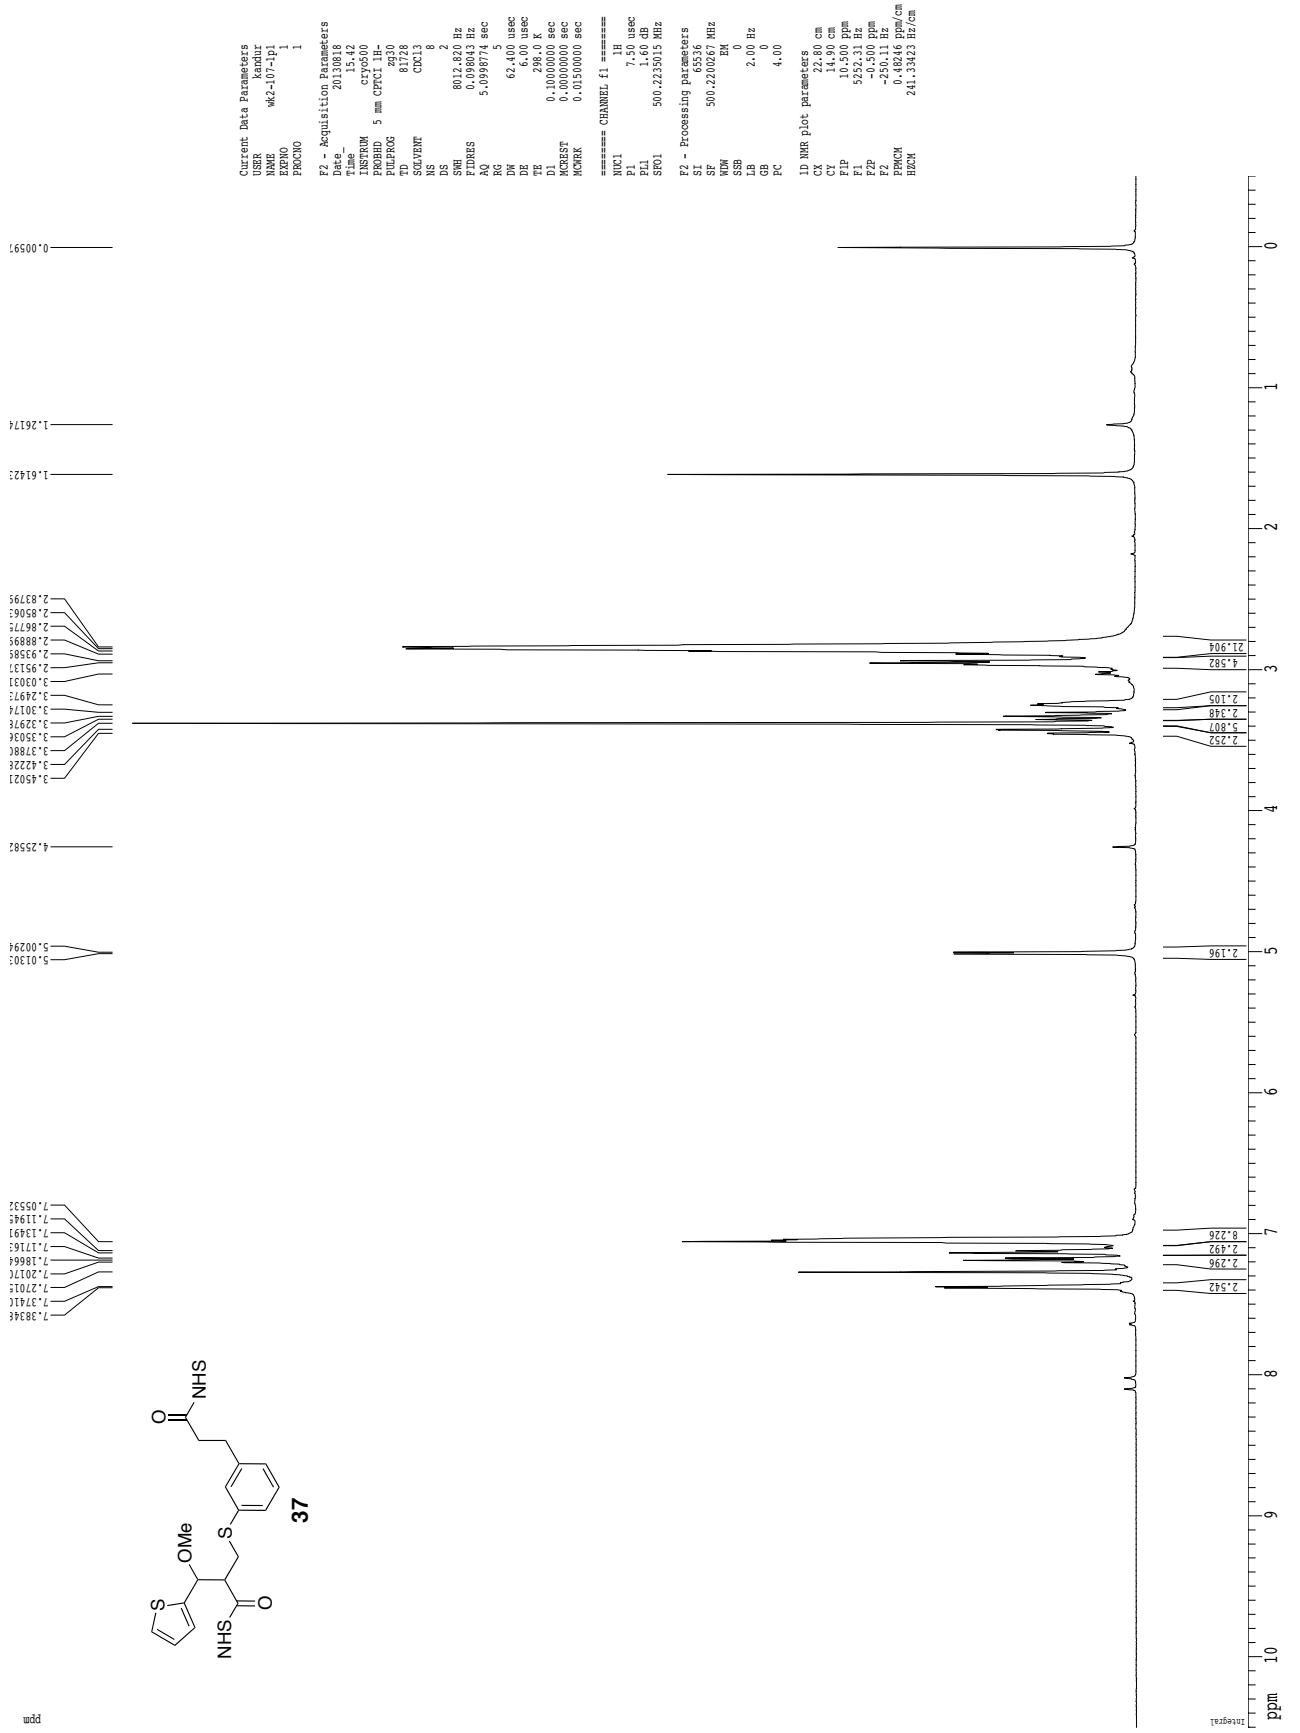

Z-restored spin-echo 13C spectrum with 1H decoupling

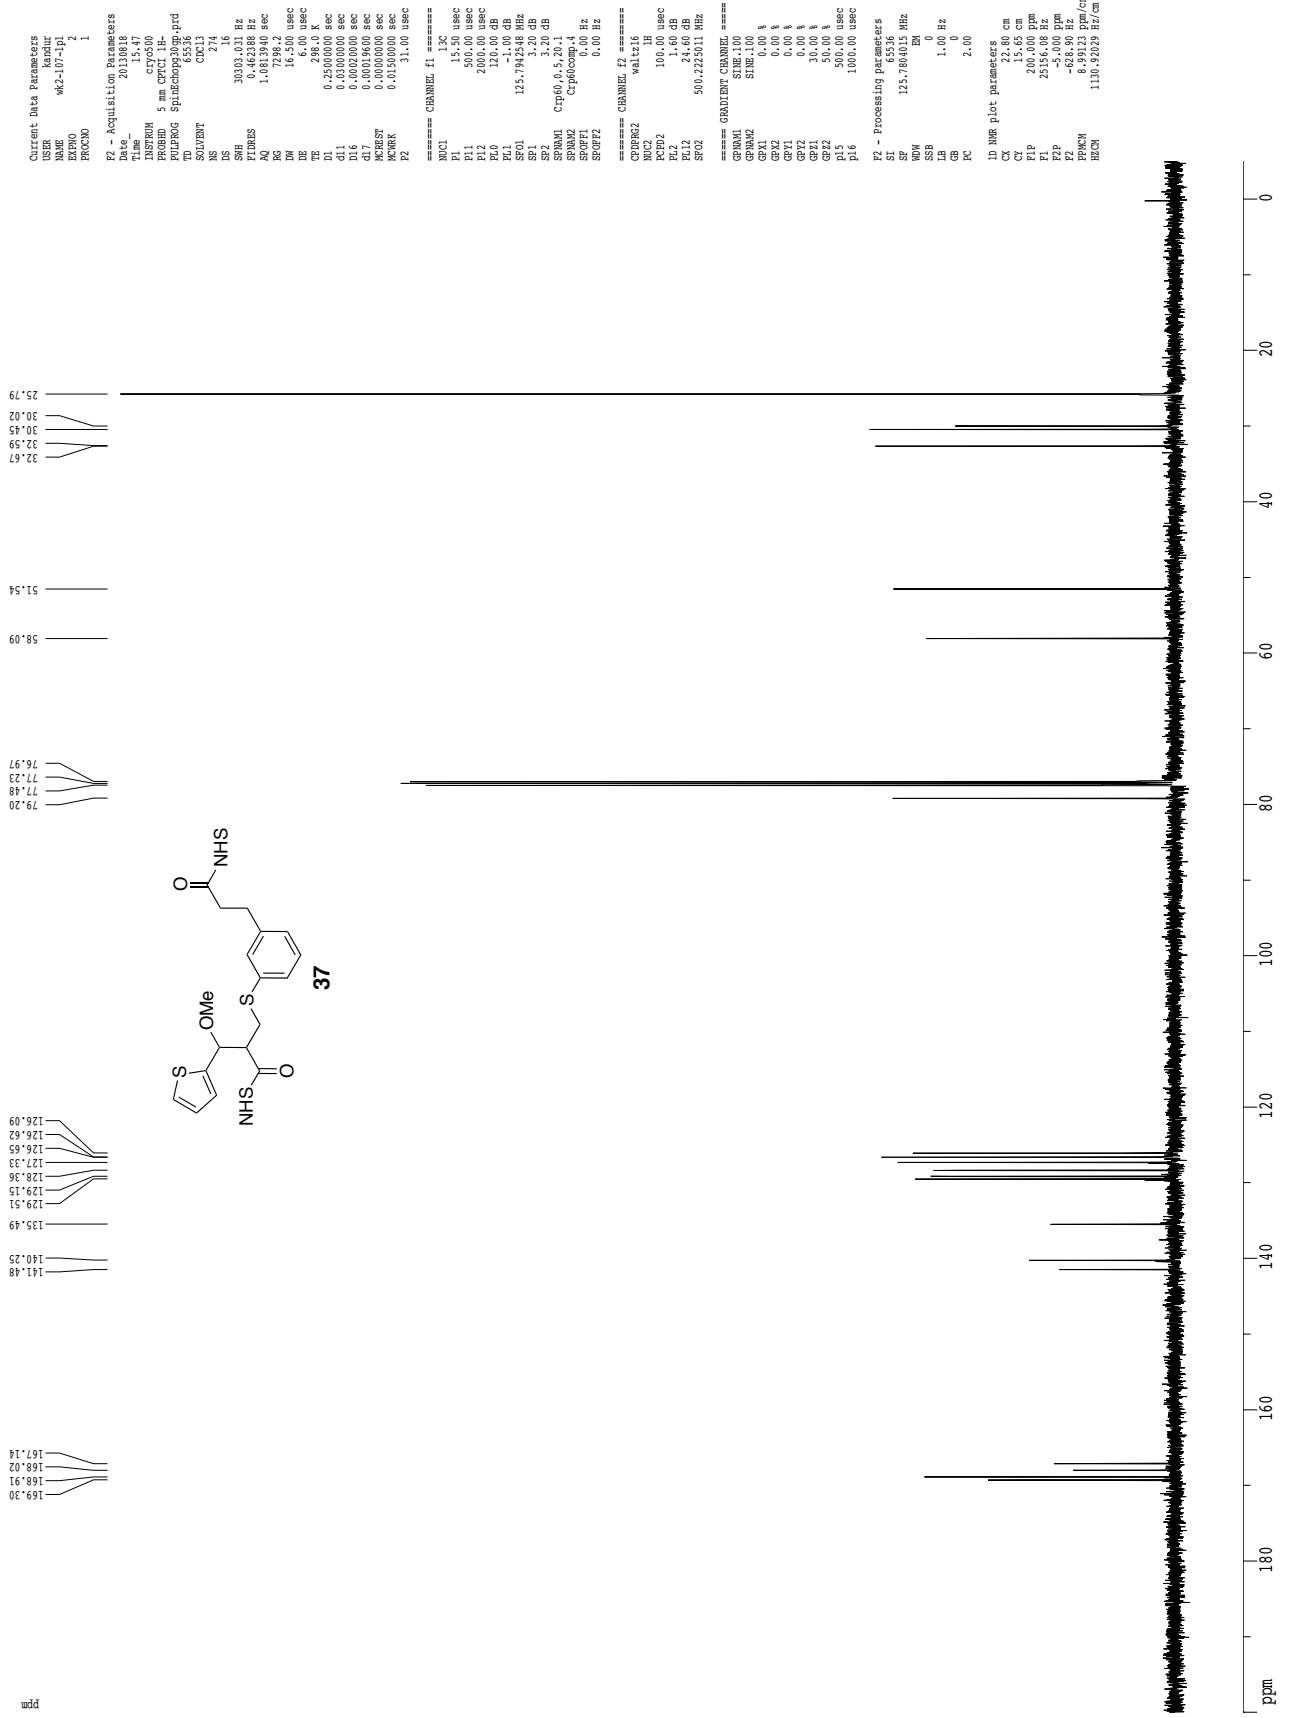



Z-restored spin-echo <sup>13</sup>C spectrum with <sup>1</sup>H decoupling

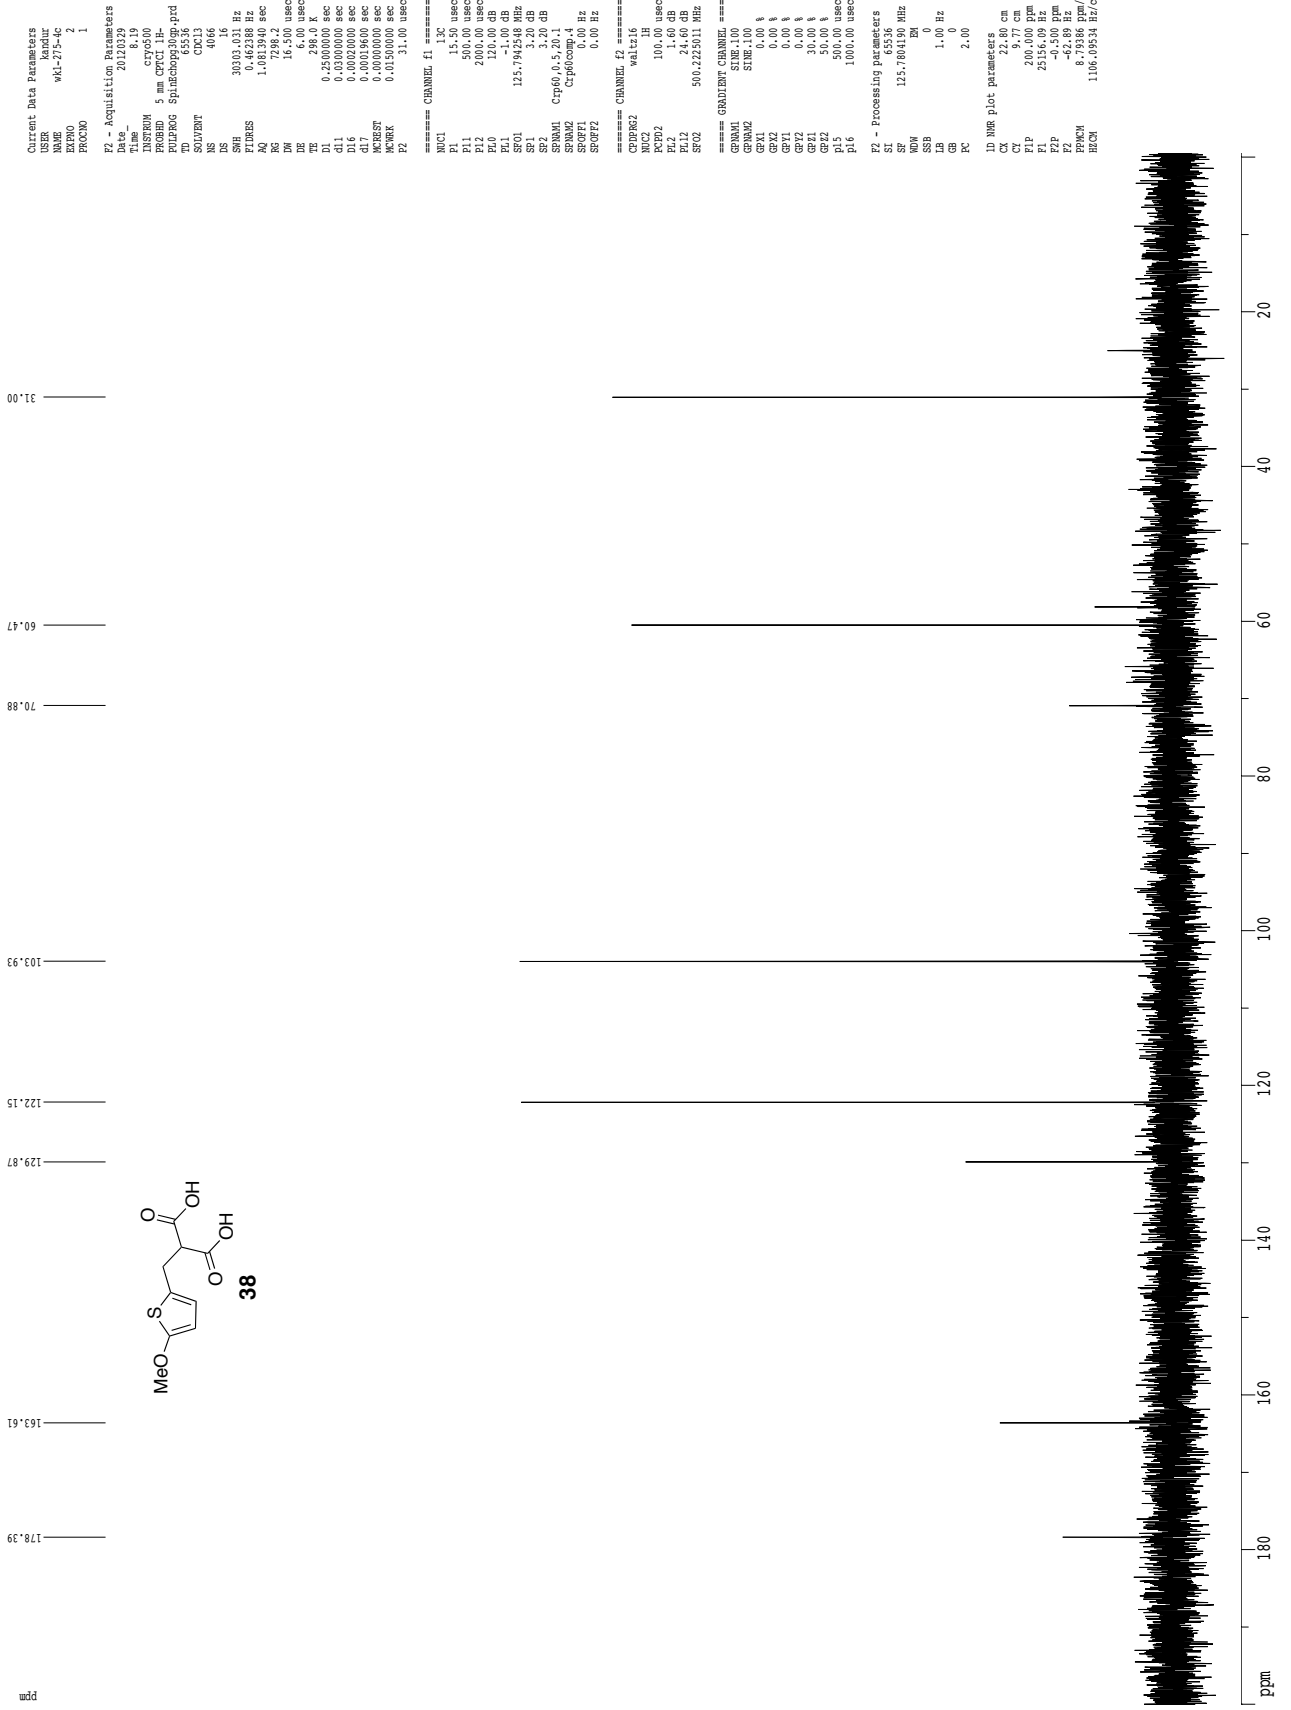



Z-restored spin-echo 13C spectrum with 1H decoupling

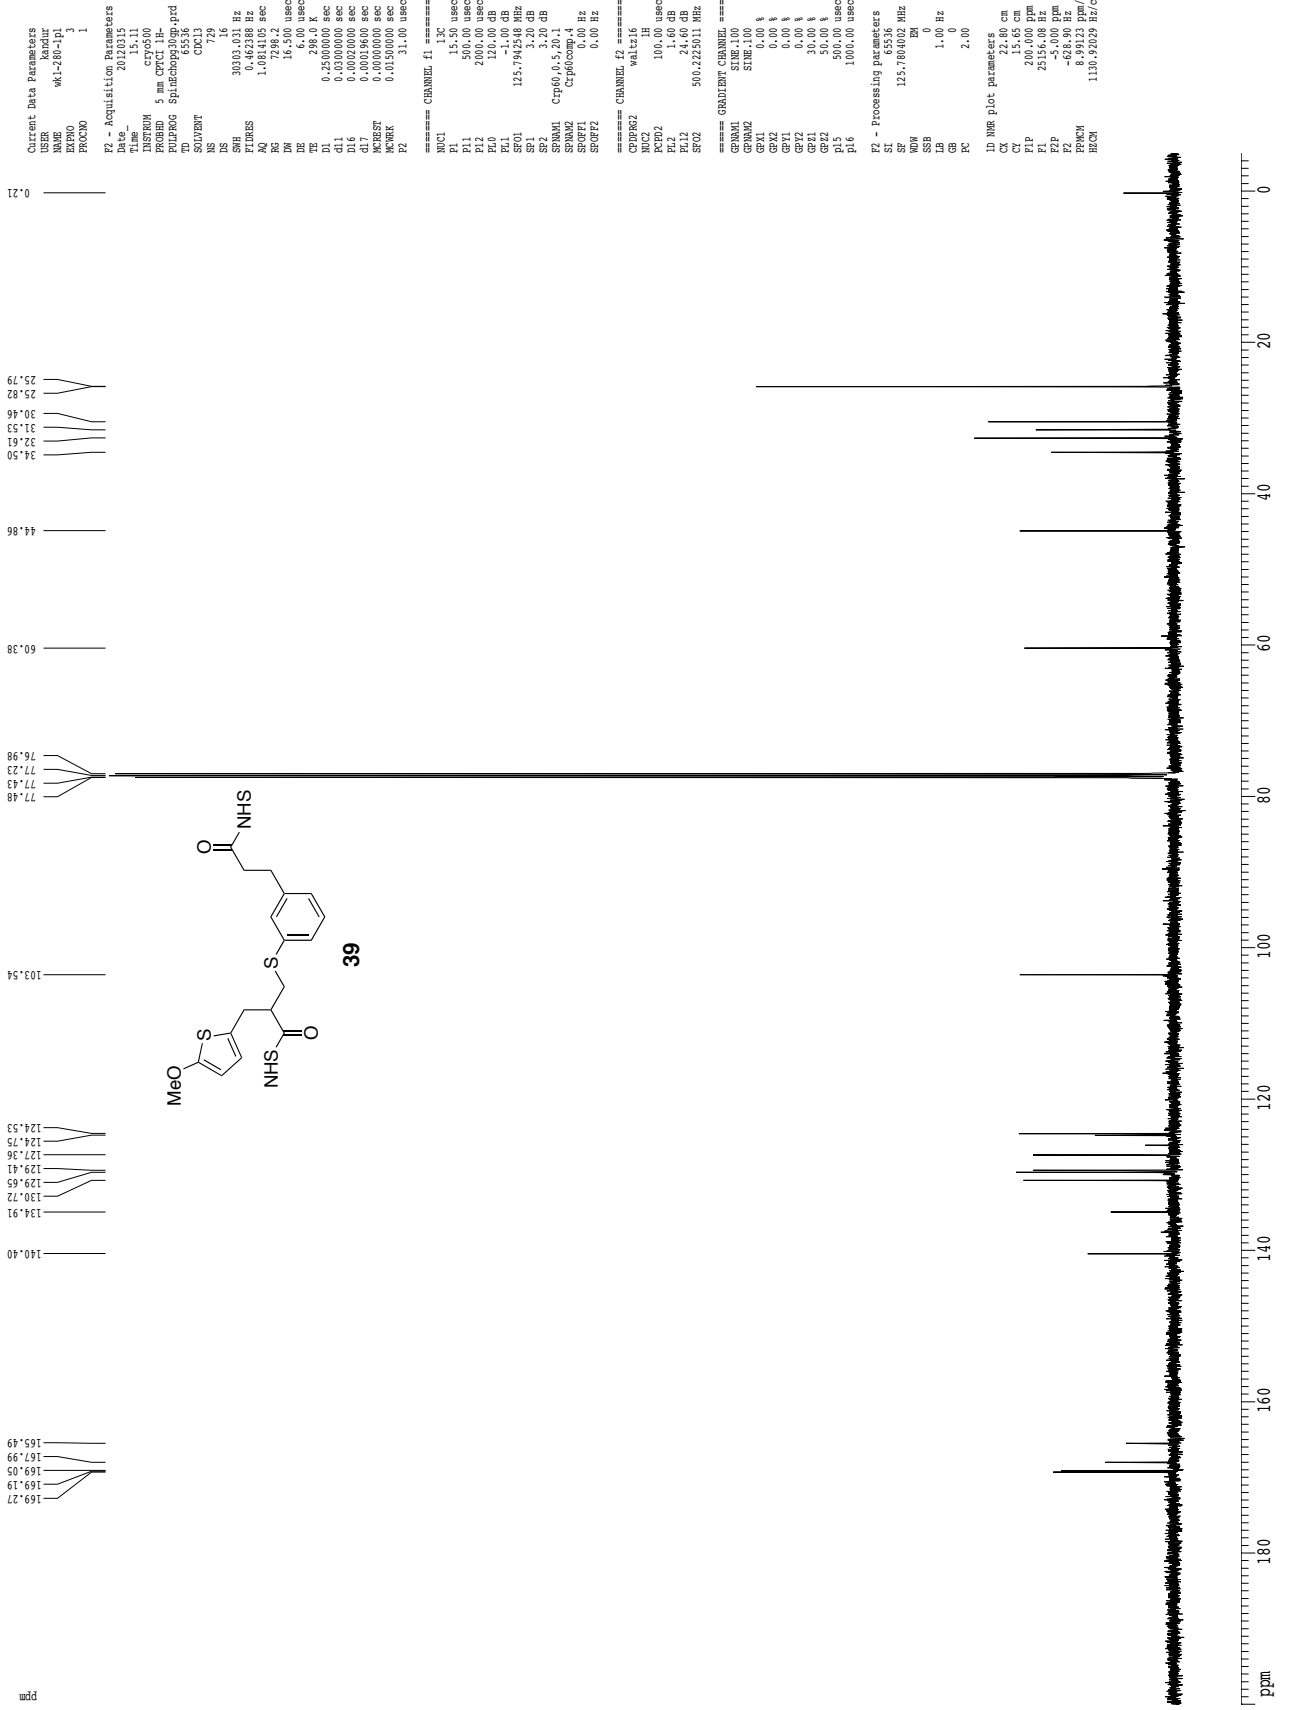

<sup>1</sup>H spectrum

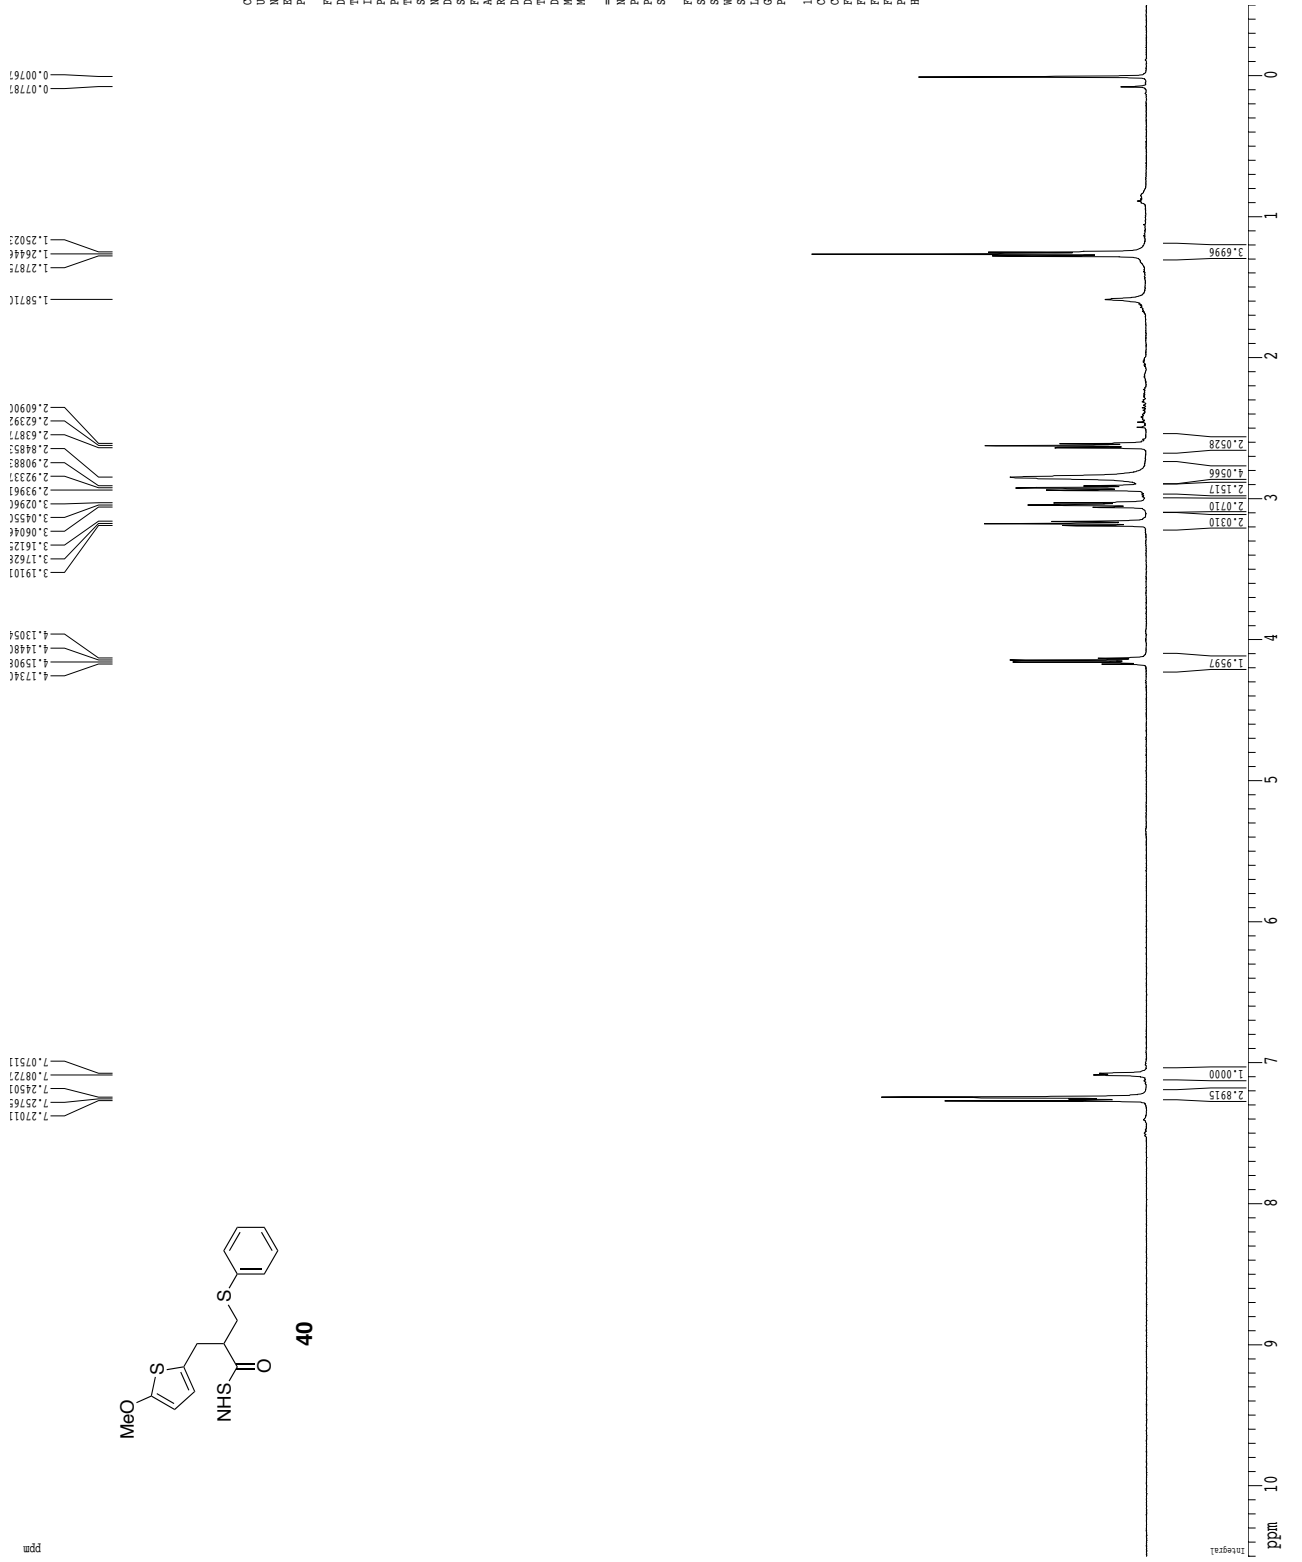

Current Data Parameters  
 USER Kandur  
 NAME wk2-082-1p  
 PROCNO 1  
 F2 - Acquisition Parameters  
 Date\_ 20130315  
 Time 9:18  
 INSTRUM spect  
 PULPROG zg30  
 TD 81728  
 SOLVENT CDCl3  
 NS 8  
 DS 2  
 SWH 8012.820 Hz  
 FIDRES 0.098043 Hz  
 AQ 5.0993398 sec  
 RG 912.3  
 DM 62.400 usec  
 DE 698.0 usec  
 TE 298.2 K  
 D1 0.10000000 sec  
 MCKEY 0.00000000 sec  
 MCKEY 0.01500000 sec  
 ===== CHANNEL f1 =====  
 NUC1 1H  
 P1 12.20 usec  
 PL1 -5.00 dB  
 SFO1 499.4034958 MHz  
 F2 - Processing parameters  
 SI 65536  
 SF 499.4000064 MHz  
 MDW EM  
 SSB 0  
 LB 0.30 Hz  
 GB 0  
 PC 1.00  
 ID NMR plot parameters  
 CX 22.80 cm  
 CY 4.90 cm  
 F1 10.80 cm  
 F2 5245.70 Hz  
 F3 -500.000 Hz  
 F4 -245.70 Hz  
 FREQ 0.48246 ppm/cm  
 HZCM 240.93861 Hz/cm





<sup>1</sup>H spectrum

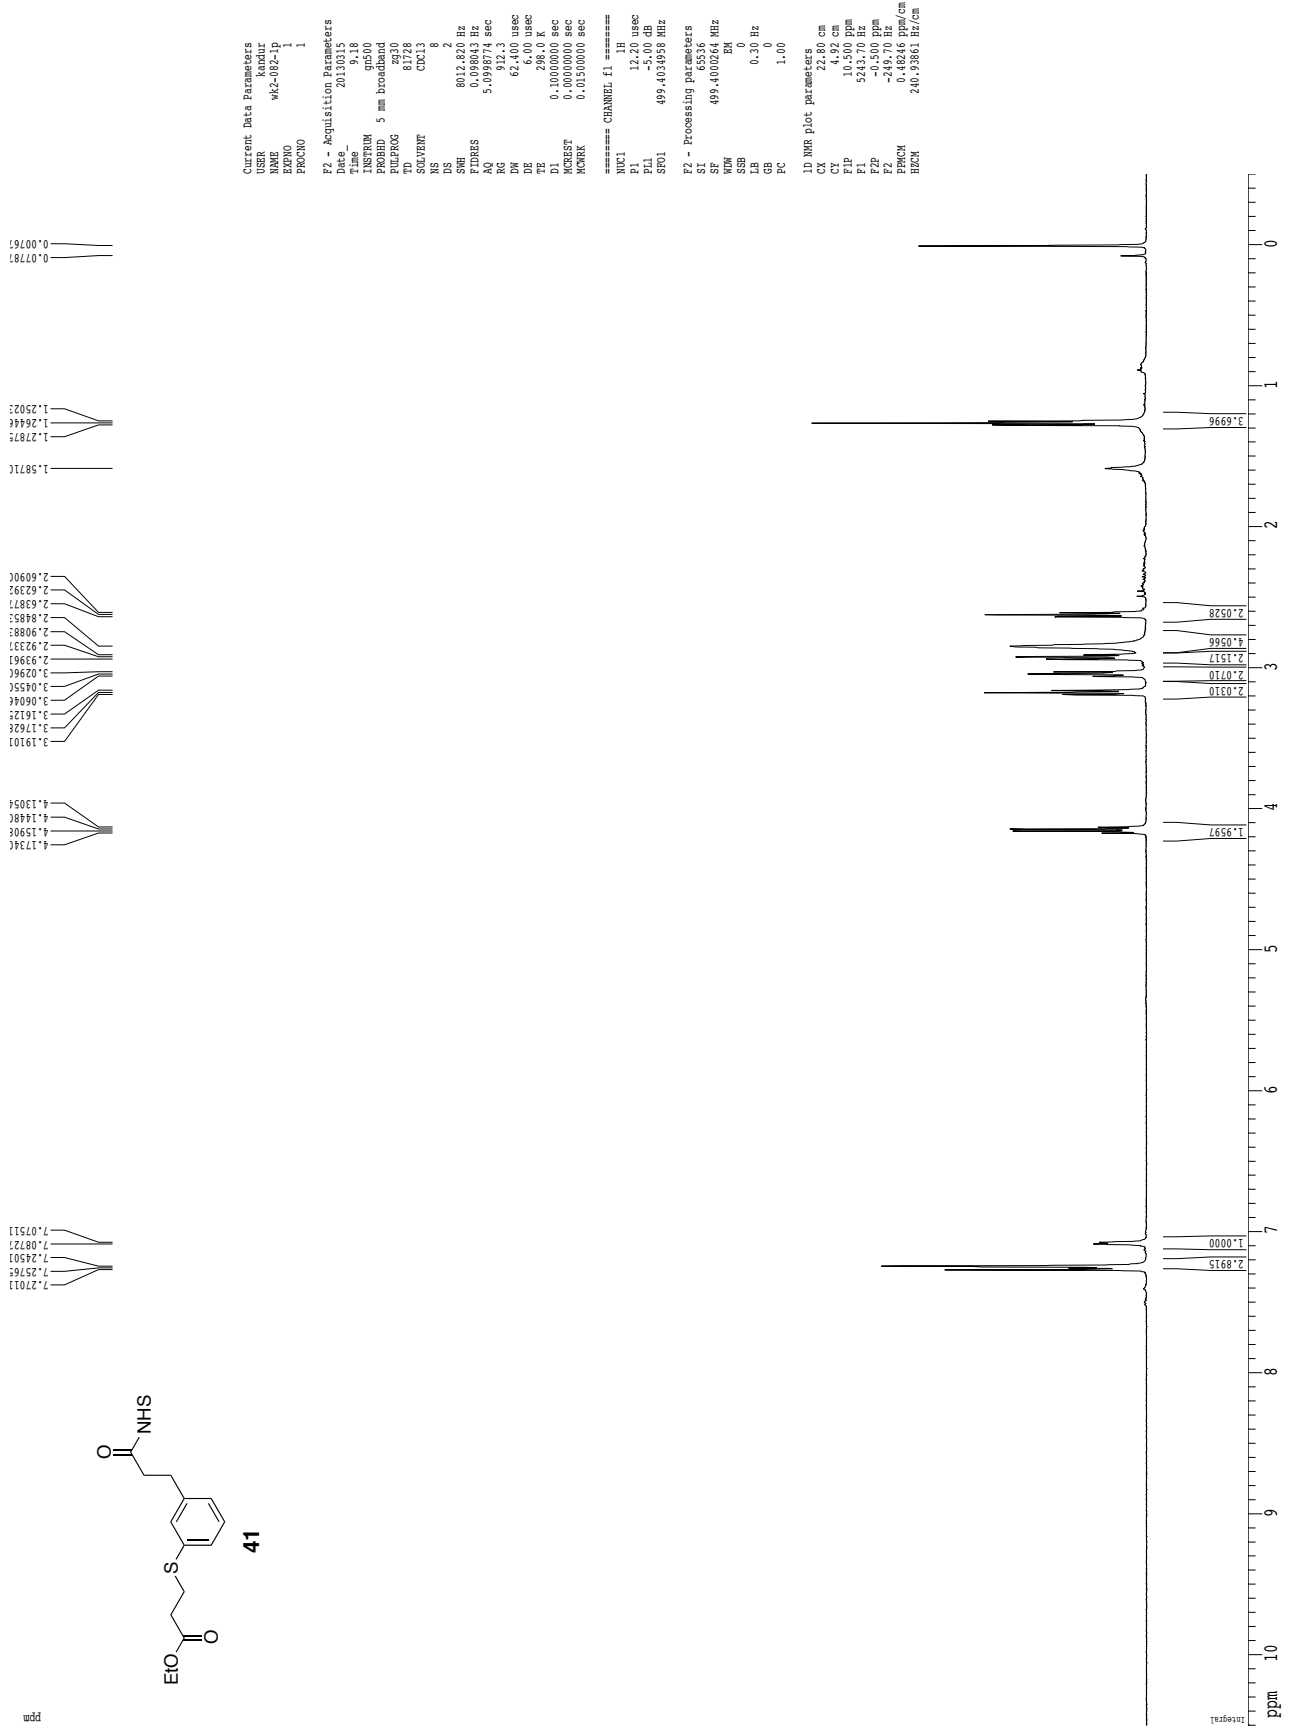

Z-restored spin-echo 13C spectrum with 1H decoupling

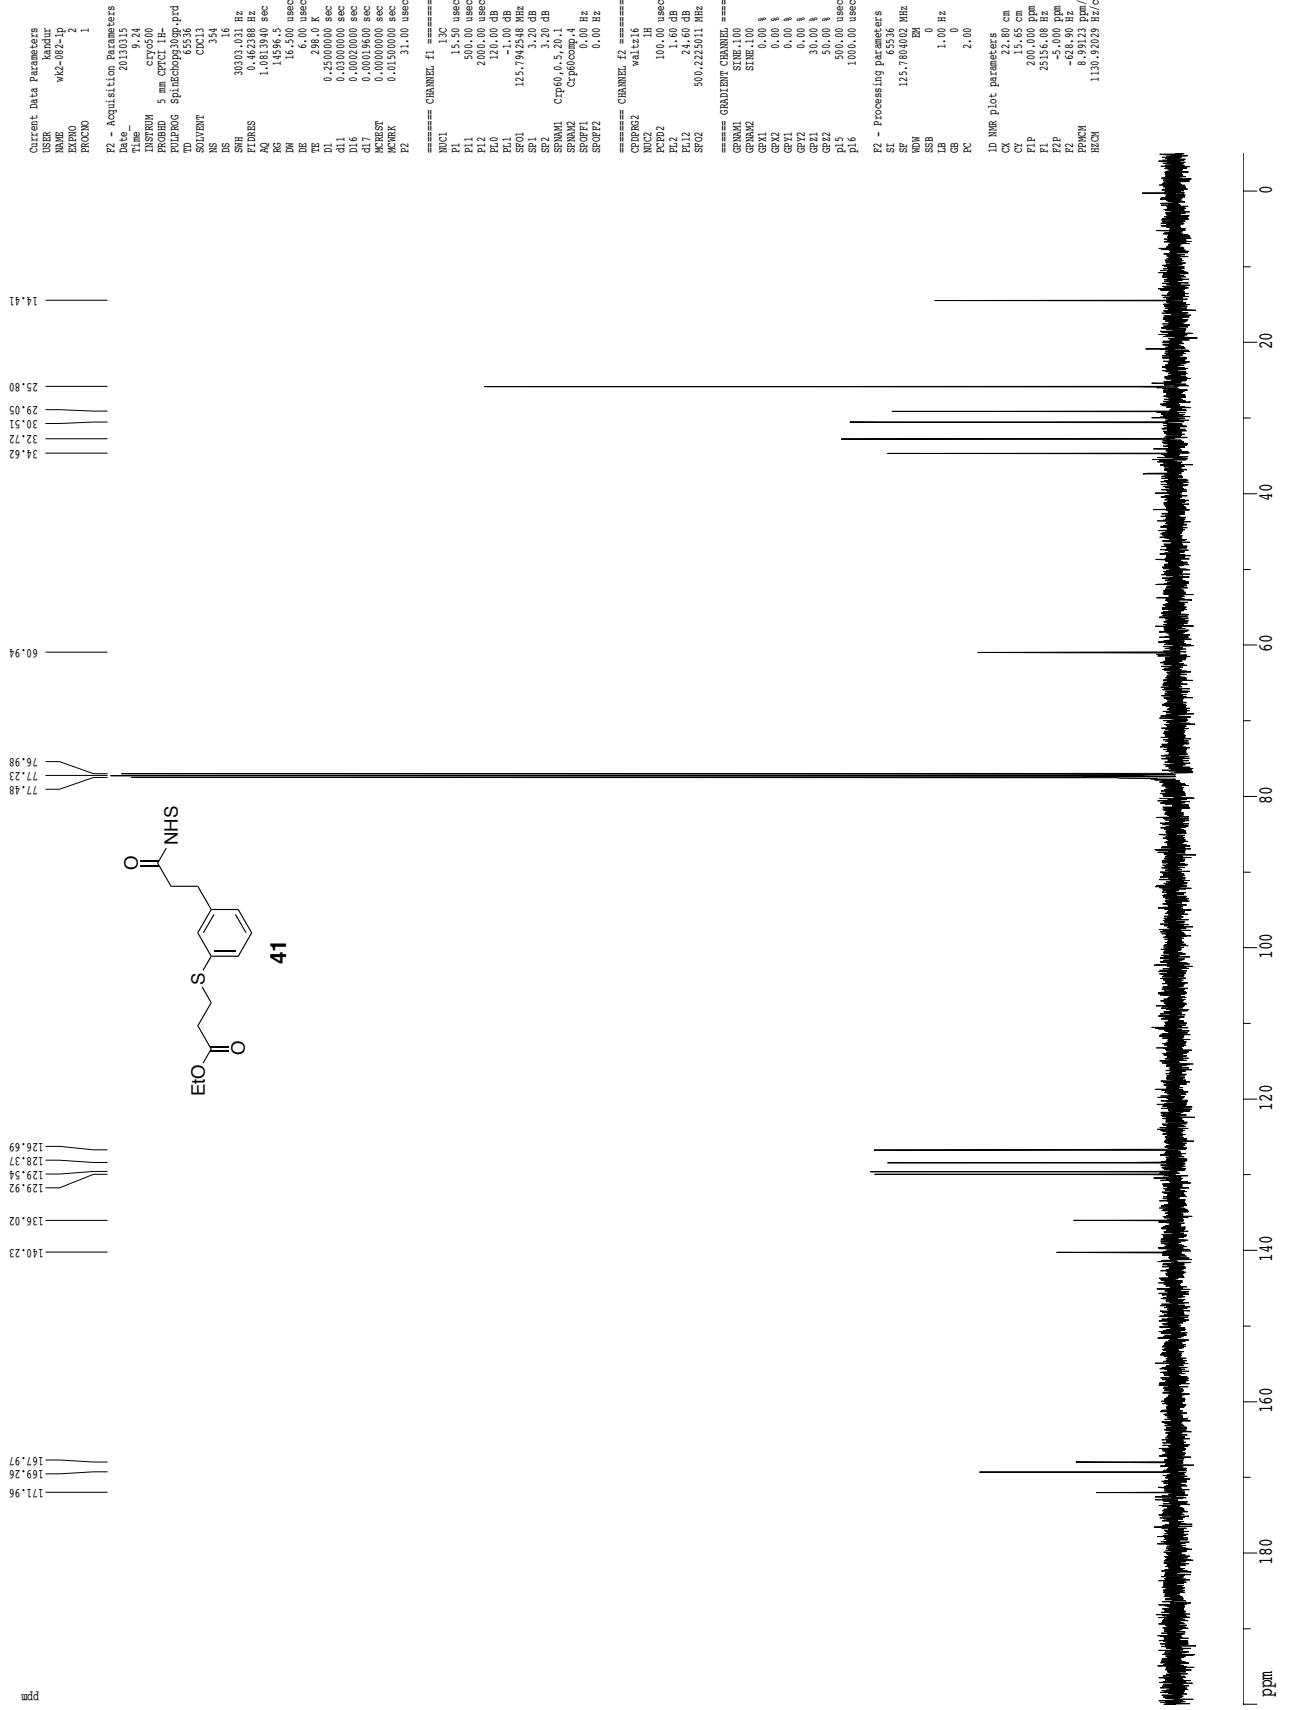

Supplement: NIHMS715579-supplement-Supplementary_Information.pdf [file NIHMS715579-supplement-Supplementary_Information.pdf]
